# Supplementary material
Source: publisher figshare collection journal article supplement (https://acs.figshare.com/ndownloader/files/10782245)

## **Supplementary Information**

### **A Flexible and Divergent Strategy to Flavonoids with a Chiral A-Ring Featuring Intramolecular Michael Addition: Stereoselective Synthesis of (+)-Cryptocaryone, (+)-Cryptogione F, and (+)-Cryptocaryanones A and B, as Well as (+)-Cryptochinones A and C**

Xiaojing Liu, Junhao Jia, Yuanliang Jia, He Gu, Jingwen Luo and Xiaochuan Chen

Key Laboratory of Green Chemistry & Technology, Ministry of Education, College of Chemistry,  
Sichuan University, Chengdu 610064, PR China  
E-mail: chenxc@scu.edu.cn

#### **Table of contents:**

|                                                                                                      |              |
|------------------------------------------------------------------------------------------------------|--------------|
| <b>1) Experimental procedures and spectroscopic data for compounds</b>                               | <b>2-15</b>  |
| <b>2) Copies of <math>^1\text{H}</math> and <math>^{13}\text{C}</math> NMR spectra for compounds</b> | <b>16-40</b> |

## Experimental procedures and spectroscopic data

**General Information:** Flash chromatography was performed using silica gel (200-300 mesh). Reactions were monitored by thin layer chromatography (TLC). Visualization was achieved under a UV lamp (254 nm), IR spectra were recorded on a commercial spectrophotometer. Optical rotations were reported as follows:  $[\alpha]_D^{25}$  ( $c$ : g/100 mL, in solvent).  $^1\text{H}$  NMR spectra were recorded on commercial instruments (400 MHz) with TMS as the internal standard. Data are reported as follows: chemical shift, multiplicity (s = singlet, d = doublet, t = triplet, m = multiplet, br = broad), coupling constants (Hz), integration.  $^{13}\text{C}$  NMR data were collected on commercial instruments (100 MHz) with complete proton decoupling. Chemical shifts are reported in ppm from the tetramethylsilane with the solvent resonance as the internal standard, and were calibrated using residual undeuterated solvent as an internal reference ( $\text{CDCl}_3$ :  $^1\text{H}$  NMR = 7.26,  $^{13}\text{C}$  NMR = 77.05). HRMS spectra were recorded by using a commercial apparatus and methanol or Dichloromethane was used to dissolve the sample. All air sensitive manipulations were carried out under a dry argon. Solvents for reaction were distilled prior to use: dichloromethane and  $\text{PhCH}_3$  from  $\text{CaH}_2$ , tetrahydrofuran (THF) from Na and acetone from Potassium carbonate, other reagents were obtained from commercial suppliers unless otherwise stated. Drying of organic extracts during the work-up of reactions was performed over anhydrous  $\text{Na}_2\text{SO}_4$ .

## Experimental procedures

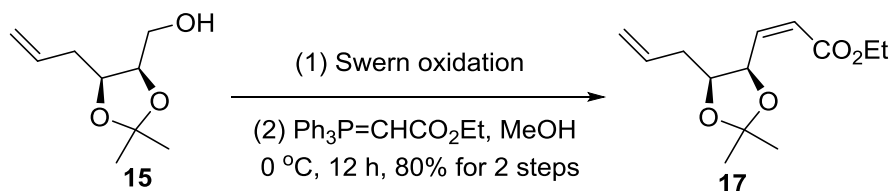

**Compound 17:** Oxalyl chloride (0.76 mL, 8.7 mmol) was added to a solution of DMSO (1.24 mL, 17.43 mmol) in  $\text{CH}_2\text{Cl}_2$  (32 mL) at  $-78\text{ }^\circ\text{C}$ . The mixture was stirred for 30 min, then a solution of **15** (1.0 g, 5.81 mmol) in  $\text{CH}_2\text{Cl}_2$  (7 mL) was added dropwise, and the resulting mixture was stirred for 2 h. Triethylamine (4.86 mL, 34.86 mmol) was added dropwise, and the mixture was stirred for 30 min and allowed to warm to rt. Water (30 mL) was added, and the mixture was extracted with  $\text{CH}_2\text{Cl}_2$  ( $3 \times 30$  mL). The combined organic extracts were dried over  $\text{Na}_2\text{SO}_4$  and concentrated in vacuo. The crude product was used in the next step without further purification.

$\text{Ph}_3\text{P}=\text{CHCO}_2\text{Et}$  (2.5 g, 7.25 mmol) was added to a solution of the crude aldehyde in methanol (28 mL) at  $0\text{ }^\circ\text{C}$ . The resulting mixture was stirred at  $0\text{ }^\circ\text{C}$  for 12 h, and concentrated in vacuo. The residue was purified by flash column chromatography using petroleum ether/ EtOAc (25:1) as eluent to afford compound **17** (1.1 g, 80% for 2 steps) as a colorless oil:  $[\alpha]_D^{26} = -154.8^\circ$  ( $c = 1.36$ ,  $\text{CHCl}_3$ ); IR (neat)

$\nu_{\text{max}}$ : 2986, 2937, 1719, 1645, 1416, 1376, 1219, 1190, 1049, 914, 824  $\text{cm}^{-1}$ ;  $^1\text{H}$  NMR (400 MHz,  $\text{CDCl}_3$ )  $\delta$  6.23 (dd,  $J = 11.6, 7.6$  Hz, 1H), 5.91 (dd,  $J = 11.6, 1.2$  Hz, 1H), 5.86 – 5.76 (m, 1H), 5.64 – 5.60 (m, 1H), 5.11 – 5.01 (m, 2H), 4.44 (ddd,  $J = 8.7, 6.6, 4.6$  Hz, 1H), 4.16 (q,  $J = 7.1$  Hz, 2H), 2.22 – 2.07 (m, 2H), 1.50 (s, 3H), 1.36 (s, 3H), 1.28 (t,  $J = 7.1$  Hz, 3H);  $^{13}\text{C}$  NMR (100 MHz,  $\text{CDCl}_3$ )  $\delta$  165.6, 146.4, 134.8, 121.7, 117.1, 108.7, 77.9, 75.1, 60.5, 35.2, 28.1, 25.3, 14.2; HRMS (ESI-TOF):  $m/z$  calcd for  $\text{C}_{13}\text{H}_{21}\text{O}_4$   $[\text{M}+\text{H}]^+$ : 241.1434, found: 241.1431.

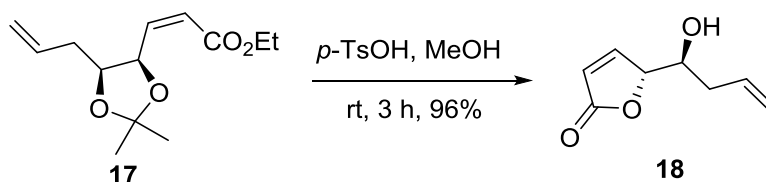

**Compound 18:** To a stirred solution of **17** (3.3 g, 13.7 mmol) in MeOH (50 mL) was added  $p$ -TsOH (474 mg, 2.75 mmol) at rt, and the resulting mixture was stirred for 3 h. The mixture was concentrated in vacuo, and purified by flash chromatography using petroleum ether/ EtOAc (2:1 to 1:1) as eluent to afford compound **18** (2.0 g, 96%) as a colorless oil:  $[\alpha]_{\text{D}}^{26} = +169.9^\circ$  ( $c = 1.04$ ,  $\text{CHCl}_3$ ); IR (neat)  $\nu_{\text{max}}$ : 3445, 3082, 2913, 1751, 1642, 1430, 1319, 1167, 1104, 1043, 921, 822  $\text{cm}^{-1}$ ;  $^1\text{H}$  NMR (400 MHz,  $\text{CDCl}_3$ )  $\delta$  7.61 (dd,  $J = 5.6, 1.6$  Hz, 1H), 6.17 (dd,  $J = 6.0, 2.0$  Hz, 1H), 5.91 – 5.77 (m, 1H), 5.23 – 5.18 (m, 2H), 4.95 (dt,  $J = 5.7, 1.8$  Hz, 1H), 3.83 (td,  $J = 9.7, 4.7$  Hz, 1H), 2.63 (d,  $J = 4.8$  Hz, 1H), 2.51 – 2.44 (m, 1H), 2.38 – 2.30 (m, 1H);  $^{13}\text{C}$  NMR (100 MHz,  $\text{CDCl}_3$ )  $\delta$  173.1, 154.1, 132.9, 122.6, 119.5, 85.3, 70.8, 38.0; HRMS (ESI-TOF):  $m/z$  calcd for  $\text{C}_8\text{H}_{11}\text{O}_3$   $[\text{M}+\text{H}]^+$ : 155.0703, found: 155.0705.

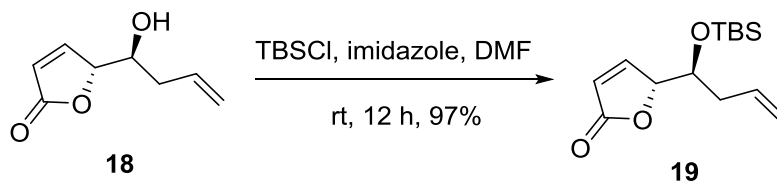

**Compound 19:** To a stirred solution of **18** (3.3 g, 13.7 mmol) in DMF (7 mL) were added imidazole (1.95 g, 28.6 mmol) and TBSCl (3.66 g, 24.3 mmol) at 0  $^\circ\text{C}$ . The mixture was stirred at rt overnight, then it was diluted with water and extracted with ethyl acetate ( $3 \times 50$  mL). The combined organic layers were washed with water and sat. NaCl, dried over  $\text{Na}_2\text{SO}_4$  and concentrated in vacuo. The residue was purified by flash column chromatography using petroleum ether/ EtOAc (8:1) to afford compound **19** (3.6 g, 97%) as a colorless oil:  $[\alpha]_{\text{D}}^{26} = +146.3^\circ$  ( $c = 1.32$ ,  $\text{CHCl}_3$ ); IR (neat)  $\nu_{\text{max}}$ : 3081, 2955, 2932, 2892, 2858, 1760, 1473, 1356, 1256, 1160, 1116, 895, 835, 778  $\text{cm}^{-1}$ ;  $^1\text{H}$  NMR (400 MHz,  $\text{CDCl}_3$ )  $\delta$  7.53 (dd,  $J = 5.6, 1.6$  Hz, 1H), 6.14 (dd,  $J = 6.0, 2.0$  Hz, 1H), 5.91 – 5.81 (m, 1H), 5.22 – 5.14 (m, 2H), 4.95 (dt,  $J = 5.0, 1.8$  Hz, 1H), 3.93 (dd,  $J = 10.8, 5.2$  Hz, 1H), 2.45 – 2.38 (m, 2H), 0.85 (s, 9H), 0.06 (s, 3H), 0.04 (s, 3H);  $^{13}\text{C}$  NMR (100 MHz,  $\text{CDCl}_3$ )  $\delta$  173.0, 154.0, 132.9, 122.6, 118.9, 84.9, 71.9,

39.2, 25.7, 18.0, -4.5, -4.9; HRMS (ESI-TOF):  $m/z$  calcd for  $C_{14}H_{24}NaO_3Si$   $[M+Na]^+$ : 291.1387, found: 291.1391.

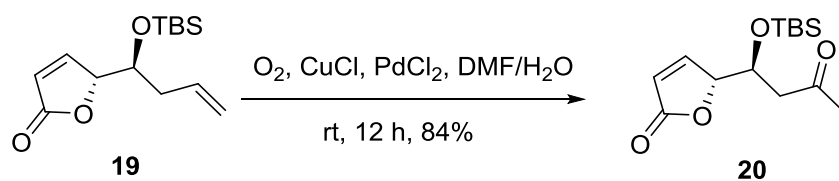

**Compound 20:** To a stirred solution of **19** (2.0 g, 7.46 mmol) in DMF (20 mL) and water (4 mL) were added  $\text{PdCl}_2$  (0.13 g, 0.75 mmol) and  $\text{CuCl}$  (0.37 g, 3.73 mmol), and the mixture was stirred at room temperature overnight under an oxygen atmosphere. The mixture was diluted with water and extracted with ethyl acetate ( $3 \times 50$  mL). The combined organic layers were washed with water and sat.  $\text{NaCl}$ , dried over  $\text{Na}_2\text{SO}_4$  and concentrated in vacuo. The residue was purified by flash column chromatography using petroleum ether/ EtOAc (6:1) to afford compound **20** (1.8 g, 84%) as a white solid: m.p.  $34 - 35$  °C;  $[\alpha]_D^{26} = +86.8$  ° ( $c = 0.84$ ,  $\text{CHCl}_3$ ); IR (neat)  $\nu_{\text{max}}$ : 3413, 2932, 2858, 1759, 1718, 1364, 1256, 1161, 1092, 836, 779  $\text{cm}^{-1}$ ;  $^1\text{H}$  NMR (400 MHz,  $\text{CDCl}_3$ )  $\delta$  7.46 (dd,  $J = 5.6, 1.6$  Hz, 1H), 6.14 (dd,  $J = 5.6, 2.0$  Hz, 1H), 5.03 – 4.99 (m, 1H), 4.39 (dd,  $J = 10.7, 5.6$  Hz, 1H), 2.70 (qd,  $J = 16.9, 5.8$  Hz, 2H), 2.18 (s, 3H), 0.82 (s, 9H), 0.06 (s, 3H), 0.02 (s, 3H);  $^{13}\text{C}$  NMR (100 MHz,  $\text{CDCl}_3$ )  $\delta$  205.6, 172.6, 153.2, 122.9, 85.4, 68.4, 47.4, 31.4, 25.7, 17.9, -4.8, -5.0; HRMS (ESI-TOF):  $m/z$  calcd for  $C_{14}H_{25}O_4Si$   $[M+H]^+$ : 285.1517, found: 285.1516.

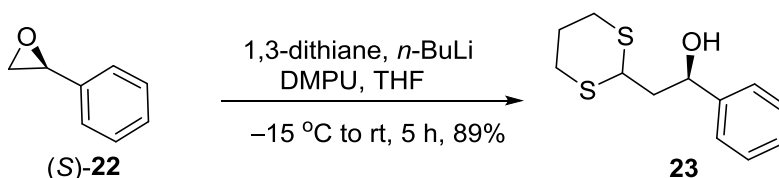

**Compound 23:** To a solution of 1,3-dithiane (1.2 g, 10 mmol) in THF (30 mL) was added dropwise  $n\text{-BuLi}$  (4.4 mL, 2.5 M in pentane, 1.8 mmol) at  $-15$  °C under an argon atmosphere, and the resulting mixture was stirred for 30 min before  $(S)\text{-22}$  (1.15 mL, 10 mmol) was added. The reaction mixture was warmed to  $0$  °C, and DMPU (5 mL) was slowly added. After stirred at rt for 5 h, the reaction mixture was quenched with aqueous  $\text{NH}_4\text{Cl}$  and diluted with EtOAc. The organic layers was separated, and the aqueous layer was extracted with EtOAc ( $3 \times 30$  mL). The combined organic layers were washed with brine, dried over anhydrous  $\text{Na}_2\text{SO}_4$ , and concentrated in vacuo. The residue was purified by column chromatography using petroleum ether/ EtOAc (2:1) to afford alcohol **23** (2.1 g, 89%) as a colorless oil:  $[\alpha]_D^{26} = -16.4$  ° ( $c = 1.24$ ,  $\text{CHCl}_3$ ); IR (neat)  $\nu_{\text{max}}$ : 3418, 2915, 1420, 1264, 1042, 897  $\text{cm}^{-1}$ ;  $^1\text{H}$  NMR (400 MHz,  $\text{CDCl}_3$ )  $\delta$  7.39 – 7.32 (m, 4H), 7.30 – 7.27 (m, 1H), 5.03 – 4.99 (m, 1H), 4.17 (dd,  $J = 8.6, 5.8$  Hz, 1H), 2.92 – 2.79 (m, 4H), 2.36 (br.s, 1H), 2.27 – 2.19 (m, 1H), 2.15 – 2.03 (m, 2H), 1.96 – 1.84

(m, 1H);  $^{13}\text{C}$  NMR (100 MHz,  $\text{CDCl}_3$ )  $\delta$  143.7, 128.6, 127.8, 125.8, 71.1, 44.4, 43.9, 30.0, 29.8, 25.9; HRMS (ESI-TOF):  $m/z$  calcd for  $\text{C}_{12}\text{H}_{17}\text{OS}_2$   $[\text{M}+\text{H}]^+$ : 241.0715, found: 241.0715.

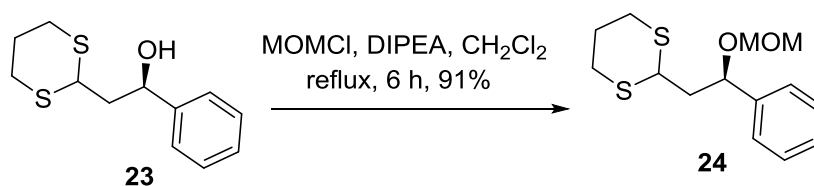

**Compound 24:** To a solution of **23** (0.96 g, 4.0 mmol) in  $\text{CH}_2\text{Cl}_2$  (28 mL) were slowly added DIPEA (1.25 mL, 7.1 mmol) and MOMCl (1.3 mL, 16.8 mmol). The resulting mixture was refluxed for 6 h, then it was quenched with sat.  $\text{NaHCO}_3$  and extracted with  $\text{CH}_2\text{Cl}_2$  ( $3 \times 30$  mL). The combined organic layers were dried over anhydrous  $\text{Na}_2\text{SO}_4$ , and concentrated in vacuo. The residue was purified by column chromatography using petroleum ether/ EtOAc (10:1) to afford compound **24** (1.03 g, 91%) as a colorless oil:  $[\alpha]_D^{26} = -76.9^\circ$  ( $c = 1.36$ ,  $\text{CHCl}_3$ ); IR (neat)  $\nu_{\text{max}}$ : 3060, 2940, 2894, 1493, 1454, 1422, 1148, 1024, 915, 763  $\text{cm}^{-1}$ ;  $^1\text{H}$  NMR (400 MHz,  $\text{CDCl}_3$ )  $\delta$  7.35 – 7.33 (m, 4H), 7.32 – 7.27 (m, 1H), 4.89 (dd,  $J = 9.0, 5.0$  Hz, 1H), 4.56 – 4.50 (m, 2H), 4.10 (dd,  $J = 9.0, 5.7$  Hz, 1H), 3.37 (s, 3H), 2.91 – 2.77 (m, 4H), 2.33 – 2.26 (m, 1H), 2.13 – 2.02 (m, 2H), 1.96 – 1.85 (m, 1H);  $^{13}\text{C}$  NMR (100 MHz,  $\text{CDCl}_3$ )  $\delta$  141.1, 128.5, 127.9, 126.9, 94.3, 74.4, 55.8, 43.6, 43.5, 29.9, 29.6, 26.0; HRMS (ESI-TOF):  $m/z$  calcd for  $\text{C}_{14}\text{H}_{21}\text{O}_2\text{S}_2$   $[\text{M}+\text{H}]^+$ : 285.0977, found: 285.0972.

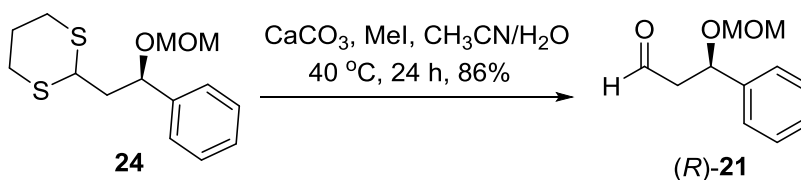

**Compound (R)-21:** To a stirred mixture of **24** (0.92 g, 3.2 mmol) and  $\text{CaCO}_3$  (3.2 g, 32 mmol) in  $\text{CH}_3\text{CN}/\text{H}_2\text{O}$  (9/1, 32.0 mL) was added MeI (1.8 mL, 28.8 mmol). The reaction mixture was stirred at 40  $^\circ\text{C}$  for 24 h, and was filtered through a pad of Celite. The two phases were separated and the aqueous phase was extracted with EtOAc. The combined organic layers were washed with brine, dried over anhydrous  $\text{Na}_2\text{SO}_4$ , and concentrated in vacuo. The residue was purified by column chromatography using petroleum ether/ EtOAc (10:1) to afford aldehyde **21** (535 mg, 86%) as a colorless oil:  $[\alpha]_D^{26} = -165.9^\circ$  ( $c = 1.08$ ,  $\text{CHCl}_3$ ); IR (neat)  $\nu_{\text{max}}$ : 3032, 2948, 2892, 1727, 1456, 1400, 1363, 1152, 1029, 920, 762  $\text{cm}^{-1}$ ;  $^1\text{H}$  NMR (400 MHz,  $\text{CDCl}_3$ )  $\delta$  9.82 (dd,  $J = 2.5, 1.4$  Hz, 1H), 7.41 – 7.28 (m, 5H), 5.18 (dd,  $J = 9.2, 4.0$  Hz, 1H), 4.58 – 4.49 (m, 2H), 3.35 (s, 3H), 2.98 (ddd,  $J = 16.5, 9.3, 2.7$  Hz, 1H), 2.69 (ddd,  $J = 16.5, 4.0, 1.3$  Hz, 1H);  $^{13}\text{C}$  NMR (100 MHz,  $\text{CDCl}_3$ )  $\delta$  200.4, 140.1, 128.8, 128.3, 126.8, 94.1, 72.7, 55.8, 51.3; HRMS (ESI-TOF):  $m/z$  calcd for  $\text{C}_{11}\text{H}_{15}\text{O}_3$   $[\text{M}+\text{H}]^+$ : 195.1016, found: 195.1018.

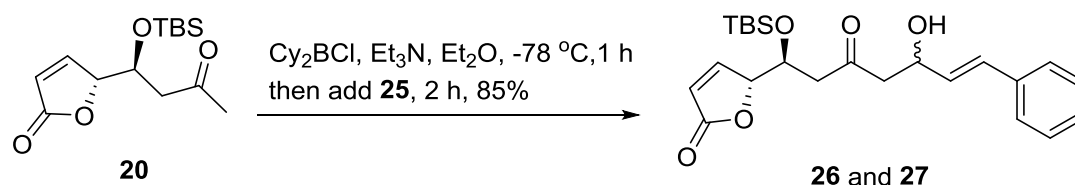

**Compound 26 and 27:** To a solution of **20** (1.0 g, 3.52 mmol) in dry Et<sub>2</sub>O (40 mL) were slowly added triethylamine (0.93 mL, 6.70 mmol) and Cy<sub>2</sub>BCl (5.6 mL, 1 M in hexanes, 5.6 mmol) at  $-78^\circ\text{C}$  under an argon atmosphere successively. The mixture was stirred for 1 h, then a solution of cinnamaldehyde (**25**) of Et<sub>2</sub>O (7.0 mL, 1 M in Et<sub>2</sub>O, 7.0 mmol) was added at  $-78^\circ\text{C}$ . The resulting mixture was stirred for 2 h, then quenched by the addition of MeOH (8 mL) and pH  $\approx 7$  buffer (2 mL), followed by MeOH (8 mL) and 30% H<sub>2</sub>O<sub>2</sub> solution (4 mL) at  $0^\circ\text{C}$ . The mixture was warmed to rt and stirred for 0.5 h before being diluted with H<sub>2</sub>O and EtOAc. The organic layer was separated and the aqueous phase was extracted with EtOAc (3  $\times$  40 mL). The combined organic layers were dried over anhydrous Na<sub>2</sub>SO<sub>4</sub> and concentrated in vacuo. The residue was purified by column chromatography using petroleum ether/EtOAc (10:1) to afford compound **26** and **27** (1.2 g, 85%) .

**Compound 26** (more polar isomer): a yellow oil,  $[\alpha]_{\text{D}}^{26} = +42.8^\circ$  ( $c = 0.43$ , CHCl<sub>3</sub>); IR (neat)  $\nu_{\text{max}}$ : 3451, 2931, 2858, 1756, 1712, 1636, 1382, 1256, 1091, 1049, 836, 779 cm<sup>-1</sup>; <sup>1</sup>H NMR (400 MHz, CDCl<sub>3</sub>)  $\delta$  7.47 (dd,  $J = 5.8, 1.5$  Hz, 1H), 7.39 – 7.35 (m, 2H), 7.34 – 7.30 (m, 2H), 7.27 – 7.24 (m, 1H), 6.64 (d,  $J = 15.3$  Hz, 1H), 6.20 (dd,  $J = 15.9, 6.2$  Hz, 1H), 6.16 (dd,  $J = 5.8, 2.0$  Hz, 1H), 5.03 (dt,  $J = 4.6, 1.8$  Hz, 1H), 4.77 (s, 1H), 4.44 (dd,  $J = 10.6, 5.8$  Hz, 1H), 2.86 (d,  $J = 3.0$  Hz, 1H), 2.84 – 2.68 (m, 4H), 0.84 (s, 9H), 0.09 (s, 3H), 0.05 (s, 3H); <sup>13</sup>C NMR (100 MHz, CDCl<sub>3</sub>)  $\delta$  207.6, 172.6, 153.1, 136.3, 130.7, 129.9, 128.6, 127.9, 126.5, 123.0, 85.4, 68.6, 68.3, 50.6, 47.7, 25.7, 18.0,  $-4.8$ ,  $-4.9$ ; HRMS (ESI-TOF):  $m/z$  calcd for C<sub>23</sub>H<sub>33</sub>O<sub>5</sub>Si [M+H]<sup>+</sup>: 417.2092, found: 417.2091.

**Compound 27** (less polar isomer): a yellow oil,  $[\alpha]_{\text{D}}^{26} = +63.0^\circ$  ( $c = 0.33$ , CHCl<sub>3</sub>); IR (neat)  $\nu_{\text{max}}$ : 3466, 2930, 2857, 1756, 1712, 1367, 1256, 1093, 1042, 837, 780 cm<sup>-1</sup>; <sup>1</sup>H NMR (400 MHz, CDCl<sub>3</sub>)  $\delta$  7.47 (dd,  $J = 5.8, 1.5$  Hz, 1H), 7.39 – 7.35 (m, 2H), 7.34 – 7.29 (m, 2H), 7.27 – 7.24 (m, 1H), 6.64 (dd,  $J = 15.9, 0.7$  Hz, 1H), 6.20 (dd,  $J = 15.9, 6.2$  Hz, 1H), 6.15 (dd,  $J = 5.8, 2.0$  Hz, 1H), 5.02 (dt,  $J = 4.9, 1.8$  Hz, 1H), 4.78 (dd,  $J = 11.4, 6.1$  Hz, 1H), 4.42 (q,  $J = 5.7$  Hz, 1H), 2.93 (s, 1H), 2.80 – 2.74 (m, 4H), 0.84 (s, 9H), 0.09 (s, 3H), 0.05 (s, 3H); <sup>13</sup>C NMR (100 MHz, CDCl<sub>3</sub>)  $\delta$  207.6, 172.6, 153.2, 136.3, 130.7, 129.9, 128.6, 127.9, 126.5, 122.9, 85.4, 68.5, 68.2, 50.6, 47.6, 25.7, 18.0,  $-4.7$ ,  $-5.0$ ; HRMS (ESI-TOF):  $m/z$  calcd for C<sub>23</sub>H<sub>33</sub>O<sub>5</sub>Si [M+H]<sup>+</sup>: 417.2092, found: 417.2088.

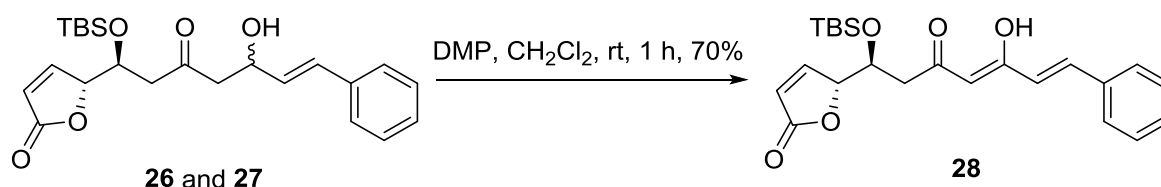

**Compound 28:** To a solution of **26** and **27** (55 mg, 0.132 mmol) in CH<sub>2</sub>Cl<sub>2</sub> (3 mL) was added Dess–Martin periodinane (84 mg, 0.20 mmol) at 0 °C. The reaction mixture was stirred at rt for 1 h, then it was quenched with a mixture of sat. NaHCO<sub>3</sub> (10 mL), sat. Na<sub>2</sub>S<sub>2</sub>O<sub>3</sub> (10 mL) and H<sub>2</sub>O (10 mL) and extracted with CH<sub>2</sub>Cl<sub>2</sub> (3 × 25 mL). The combined organic layers were dried over anhydrous Na<sub>2</sub>SO<sub>4</sub> and concentrated in vacuo. The residue was purified by column chromatography using petroleum ether/ EtOAc (4:1) to afford compound **28** (38 mg, 70%) as a brown oil: [α]<sub>D</sub><sup>26</sup> = +49.2 ° (c = 0.64, CHCl<sub>3</sub>); IR (neat) ν<sub>max</sub>: 2954, 2930, 2857, 1787, 1759, 1637, 1586, 1443, 1256, 1157, 1112, 835, 778 cm<sup>-1</sup>; <sup>1</sup>H NMR (400 MHz, CDCl<sub>3</sub>) δ 15.27 (br s, 1H), 7.63 (d, *J* = 15.9 Hz, 1H), 7.55 – 7.49 (m, 3H), 7.43 – 7.36 (m, 3H), 6.47 (d, *J* = 15.9 Hz, 1H), 6.18 (dd, *J* = 5.8, 2.0 Hz, 1H), 5.69 (s, 1H), 5.08 (dt, *J* = 4.0, 1.8 Hz, 1H), 4.44 (td, *J* = 6.1, 4.4 Hz, 1H), 2.66 (dd, *J* = 6.2, 3.1 Hz, 2H), 0.83 (s, 9H), 0.07 (s, 3H), 0.03 (s, 3H); <sup>13</sup>C NMR (100 MHz, CDCl<sub>3</sub>) δ 196.3, 177.5, 172.7, 153.0, 140.7, 134.8, 130.2, 129.0, 128.1, 123.1, 122.2, 102.1, 85.5, 69.4, 44.7, 25.7, 18.0, –4.9, –5.0; HRMS (ESI-TOF): *m/z* calcd for C<sub>23</sub>H<sub>31</sub>O<sub>5</sub>Si [M+H]<sup>+</sup>: 415.1935, found: 415.1939.

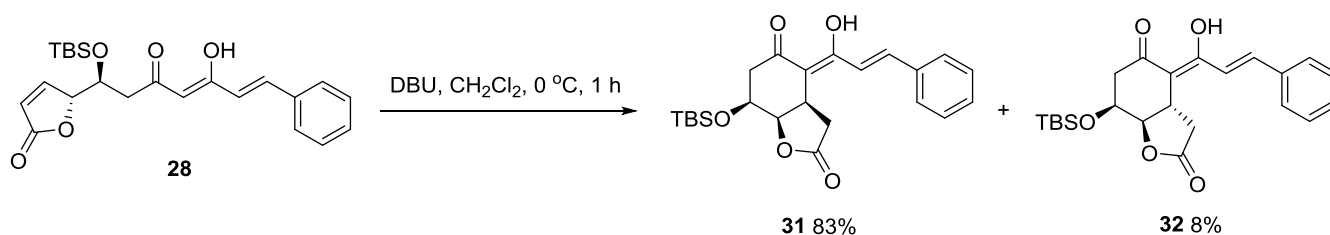

**Compound 31 and 32:** To a solution of **28** (70 mg, 0.17 mmol) in CH<sub>2</sub>Cl<sub>2</sub> (3 mL) was added DBU (28 μL, 0.19 mmol) at 0 °C. The mixture was stirred for 1 h, then it was quenched with solution of sat. NH<sub>4</sub>Cl, and extracted with CH<sub>2</sub>Cl<sub>2</sub> (3 × 25 mL). The combined organic layers were dried over anhydrous Na<sub>2</sub>SO<sub>4</sub> and concentrated in vacuo. The residue was purified by column chromatography using petroleum ether/ EtOAc (6:1 to 4:1) to afford compound **31** (59 mg, 83%) and compound **32** (5.6 mg, 8%).

**Compound 31:** a brown oil,  $[\alpha]_D^{26} = +313.8^\circ$  ( $c = 0.42$ ,  $\text{CHCl}_3$ ); IR (neat)  $\nu_{\text{max}}$ : 3381, 2930, 2857, 1781, 1628, 1583, 1410, 1257, 1087, 1050, 839, 781  $\text{cm}^{-1}$ ;  $^1\text{H}$  NMR (400 MHz,  $\text{CDCl}_3$ )  $\delta$  16.82 (d,  $J = 0.9$  Hz, 1H), 7.79 (d,  $J = 15.6$  Hz, 1H), 7.57 – 7.51 (m, 2H), 7.46 – 7.37 (m, 3H), 6.72 (dd,  $J = 15.5, 0.9$  Hz, 1H), 4.70 (dd,  $J = 8.4, 2.8$  Hz, 1H), 4.38 (dd,  $J = 6.2, 3.1$  Hz, 1H), 3.79 (dt,  $J = 11.0, 9.6$  Hz, 1H), 2.82 (dd,  $J = 17.1, 9.7$  Hz, 1H), 2.72 (dd,  $J = 17.1, 11.2$  Hz, 1H), 2.69 – 2.65 (m, 2H), 0.85 (s, 9H), 0.11 (s, 3H), 0.09 (s, 3H);  $^{13}\text{C}$  NMR (100 MHz,  $\text{CDCl}_3$ )  $\delta$  191.6, 179.0, 176.0, 143.0, 134.7, 130.7, 129.1, 128.3, 118.7, 106.0, 78.2, 67.6, 40.6, 38.1, 33.6, 25.7, 17.9, –5.2, –5.2; HRMS (ESI-TOF):  $m/z$  calcd for  $\text{C}_{23}\text{H}_{31}\text{O}_5\text{Si} [\text{M}+\text{H}]^+$ : 415.1935, found: 415.1934.

**Compound 32:** a yellow solid, m.p. 106 – 108 °C;  $[\alpha]_D^{22} = -140.0^\circ (c = 0.56, \text{CHCl}_3)$ ; IR (neat)  $\nu_{\text{max}}$ : 3371, 2928, 2852, 1782, 1622, 1580, 1406, 1250, 1109, 1047, 837, 771  $\text{cm}^{-1}$ ;  $^1\text{H}$  NMR (400 MHz,

CDCl<sub>3</sub>)  $\delta$  16.89 (d,  $J$  = 0.5 Hz, 1H), 7.81 (d,  $J$  = 15.6 Hz, 1H), 7.60 – 7.52 (m, 2H), 7.45 – 7.39 (m, 3H), 6.73 (d,  $J$  = 15.6 Hz, 1H), 4.61 (t,  $J$  = 6.4 Hz, 1H), 4.29 (td,  $J$  = 5.9, 4.0 Hz, 1H), 3.82 (ddd,  $J$  = 8.6, 7.0, 5.8 Hz, 1H), 3.05 (dd,  $J$  = 17.5, 8.8 Hz, 1H), 2.77 (dd,  $J$  = 17.8, 3.9 Hz, 1H), 2.55 – 2.44 (m, 2H), 0.87 (s, 9H), 0.12 (s, 3H), 0.10 (s, 3H); <sup>13</sup>C NMR (100 MHz, CDCl<sub>3</sub>)  $\delta$  189.9, 180.8, 175.0, 143.4, 134.7, 130.8, 129.1, 128.4, 118.7, 106.2, 80.0, 66.0, 38.6, 38.0, 32.9, 25.6, 18.0, –4.8, –4.9; HRMS (ESI-TOF):  $m/z$  calcd for C<sub>23</sub>H<sub>31</sub>O<sub>5</sub>Si [M+H]<sup>+</sup>: 415.1935, found: 415.1930.

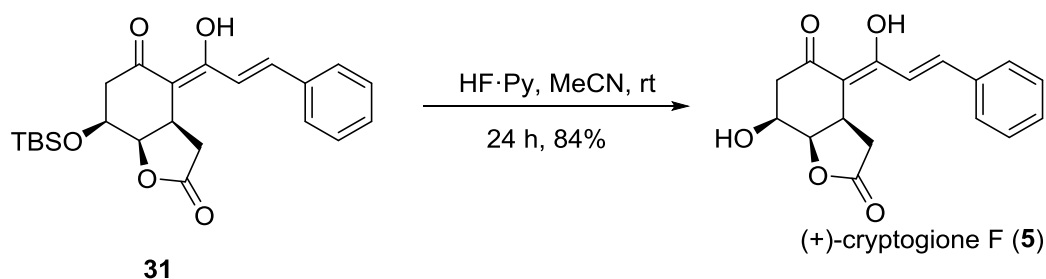

**(+)-Cryptogione F (5):** To a solution of **31** (50 mg, 0.12 mmol) in CH<sub>3</sub>CN (2 mL) at 0 °C was added HF Py complex (70% HF, 0.2 mL) dropwise. The mixture was stirred for 24 h, then it was diluted with water and extracted with ethyl acetate (3 × 25 mL). The combined organic layers were washed with sat. NaHCO<sub>3</sub>, dried over anhydrous Na<sub>2</sub>SO<sub>4</sub> and concentrated in vacuo. The residue was purified by column chromatography using petroleum ether/ EtOAc (1:1) to afford **(+)-5** (30 mg, 84%) as a pale-yellow solid: m.p. 106 – 108 °C; [ $\alpha$ ]<sub>D</sub><sup>26</sup> = +190.1 ° ( $c$  = 0.05, MeOH); IR (neat)  $\nu_{\max}$ : 3426, 2928, 1773, 1628, 1579, 1409, 1190, 1074, 1045, 973, 764 cm<sup>-1</sup>; <sup>1</sup>H NMR (400 MHz, CDCl<sub>3</sub>-CD<sub>3</sub>OD)  $\delta$  7.77 (d,  $J$  = 15.4 Hz, 1H), 7.63 – 7.52 (m, 2H), 7.44 – 7.40 (m, 3H), 6.75 (d,  $J$  = 15.5 Hz, 1H), 4.80 (dd,  $J$  = 8.0 Hz, 2.8 Hz, 1H), 4.31 – 4.27 (m, 1H), 3.84 (dd,  $J$  = 17.4, 8.7 Hz, 1H), 3.41 (s, 1H), 2.91 (dd,  $J$  = 17.2, 9.3 Hz, 1H), 2.83 – 2.72 (m, 2H), 2.68 (dd,  $J$  = 18.0, 2.8 Hz, 1H); <sup>13</sup>C NMR (100 MHz, CDCl<sub>3</sub>-CD<sub>3</sub>OD)  $\delta$  190.6, 179.5, 177.2, 143.1, 134.5, 130.6, 128.9, 128.2, 118.5, 105.9, 79.1, 65.5, 38.9, 38.0, 33.5; HRMS (ESI-TOF):  $m/z$  calcd for C<sub>17</sub>H<sub>16</sub>O<sub>5</sub>Na [M+Na]<sup>+</sup>: 323.0889, found: 323.0890.

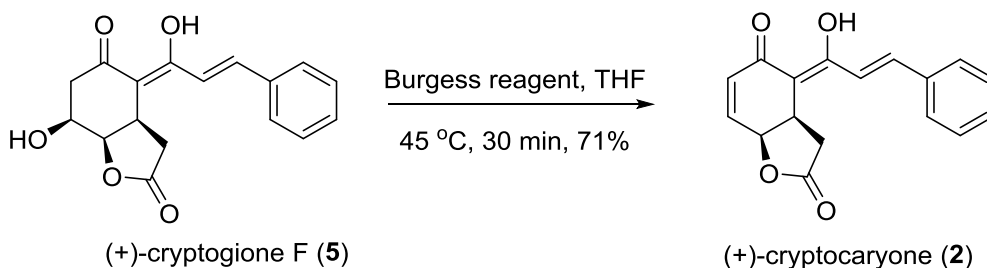

**(+)-Cryptocaryone (2):** To a solution of **5** (20 mg, 0.067 mmol) in dry THF (1.3 mL) was added Burgess reagent (43 mg, 0.17 mmol) at rt. The mixture was stirred for 30 min at 45 °C, then it was diluted with water and extracted with ethyl acetate (3 × 15 mL). The combined organic layers were



dried over anhydrous  $\text{Na}_2\text{SO}_4$ , and concentrated in vacuo. The residue was purified by column chromatography using petroleum ether/ EtOAc (4:1) to afford (+)-**2** (13.4 mg, 71%) as yellow solid: m.p. 152 – 153 °C;  $[\alpha]_{\text{D}}^{26} = +775.6^\circ$  ( $c = 0.80$ ,  $\text{CHCl}_3$ ); IR (neat)  $\nu_{\text{max}}$ : 3385, 2925, 1781, 1628, 1577, 1415, 1284, 1148, 1019, 758  $\text{cm}^{-1}$ ;  $^1\text{H}$  NMR (400 MHz,  $\text{CDCl}_3$ )  $\delta$  15.99 (d,  $J = 1.3$  Hz, 1H), 7.77 (d,  $J = 15.6$  Hz, 1H), 7.58 – 7.55 (m, 2H), 7.43 – 7.41 (m, 3H), 6.78 (dd,  $J = 15.6, 1.2$  Hz, 1H), 6.55 (ddd,  $J = 10.2, 2.1, 1.1$  Hz, 1H), 6.21 (dd,  $J = 10.2, 1.9$  Hz, 1H), 5.48 (dt,  $J = 8.8, 2.0$  Hz, 1H), 3.99 (dtd,  $J = 12.2, 8.8, 0.9$  Hz, 1H), 2.79 (dd,  $J = 17.6, 8.7$  Hz, 1H), 2.62 (dd,  $J = 17.2, 12.4$  Hz, 1H);  $^{13}\text{C}$  NMR (100 MHz,  $\text{CDCl}_3$ )  $\delta$  185.9, 174.5, 174.1, 142.4, 139.8, 134.8, 130.6, 130.1, 129.1, 128.2, 116.7, 103.3, 76.2, 35.3, 33.9; HRMS (ESI-TOF):  $m/z$  calcd for  $\text{C}_{17}\text{H}_{14}\text{O}_4\text{Na}$   $[\text{M}+\text{Na}]^+$ : 305.0784, found: 305.0789.

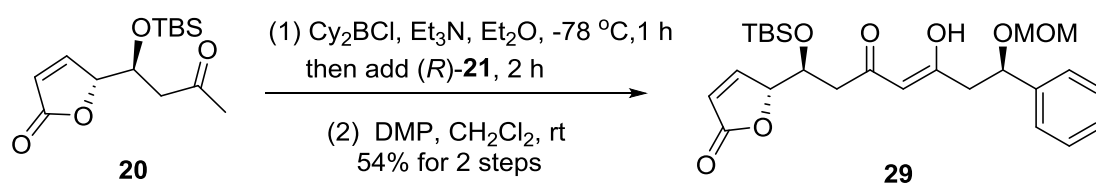

**Compound 29:** To a solution of **20** (432 mg, 1.52 mmol) in dry  $\text{Et}_2\text{O}$  (15 mL) was slowly added triethylamine and  $\text{Cy}_2\text{BCl}$  (2.6 mL, 1 M in hexanes, 2.6 mmol) at  $-78^\circ\text{C}$  under an argon atmosphere successively. The mixture was stirred at the same temperature for 1 h, then a solution of aldehyde (R)-**21** (440 mg, 2.28 mmol) of  $\text{Et}_2\text{O}$  (3 mL) was added at  $-78^\circ\text{C}$ . The mixture was stirred at  $-78^\circ\text{C}$  for 2 h, then quenched by the addition of MeOH (4 mL) and pH  $\approx 7$  buffer (1 mL), followed by MeOH (4 mL) and 30%  $\text{H}_2\text{O}_2$  solution (2 mL) at  $0^\circ\text{C}$ . The mixture was warmed to rt and stirred for 0.5 h before being diluted with  $\text{H}_2\text{O}$  and EtOAc. The layers were separated and the aqueous phase was extracted with EtOAc ( $3 \times 30$  mL). The combined organic layers were dried over anhydrous  $\text{Na}_2\text{SO}_4$  and concentrated in vacuo. The residue was purified by column chromatography using petroleum ether/ EtOAc (4:1 to 2:1) to afford a mixture of two isomers.

To a solution of the above mixture in  $\text{CH}_2\text{Cl}_2$  (20 mL) was added DMP (722 mg, 1.7 mmol) at  $0^\circ\text{C}$ . The reaction mixture was stirred at rt for 40 min, then it was quenched with sat.  $\text{NaHCO}_3$  (15 mL), sat.  $\text{Na}_2\text{S}_2\text{O}_3$  (15 mL) and  $\text{H}_2\text{O}$  (15 mL) and extracted with  $\text{CH}_2\text{Cl}_2$  ( $3 \times 30$  mL). The combined organic layers were dried over anhydrous  $\text{Na}_2\text{SO}_4$  and concentrated in vacuo. The residue was purified by column chromatography using petroleum ether/ EtOAc (4:1) to afford compound **29** (391 mg, 54% for 2 steps) as a yellowish oil:  $[\alpha]_{\text{D}}^{26} = +111.2^\circ$  ( $c = 0.44$ ,  $\text{CHCl}_3$ ); IR (neat)  $\nu_{\text{max}}$ : 3381, 2931, 2857, 1760, 1605, 1464, 1256, 1097, 836, 779  $\text{cm}^{-1}$ ;  $^1\text{H}$  NMR (400 MHz,  $\text{CDCl}_3$ )  $\delta$  15.38 (br s, 1H), 7.46 (dd,  $J = 5.8, 1.5$  Hz, 1H), 7.35 – 7.32 (m, 4H), 7.31 – 7.27 (m, 1H), 6.16 (dd,  $J = 5.8, 2.0$  Hz, 1H), 5.56 (s, 1H), 5.08 (dd,  $J = 9.2, 4.7$  Hz, 1H), 4.99 (dt,  $J = 4.2, 1.8$  Hz, 1H), 4.49 (s, 2H), 4.36 – 4.31 (m, 1H), 3.28 (s, 3H), 2.80 (dd,  $J = 14.7, 9.2$  Hz, 1H), 2.62 (dd,  $J = 14.7, 4.7$  Hz, 1H), 2.54 (d,  $J = 6.2$  Hz, 2H), 0.83 (s, 9H), 0.05 (s, 3H), 0.01 (s, 3H);  $^{13}\text{C}$  NMR (100 MHz,  $\text{CDCl}_3$ )  $\delta$  190.9, 189.8, 172.6, 152.9, 140.5, 128.7,

128.6, 128.1, 126.8, 123.1, 102.4, 94.1, 85.3, 74.3, 69.3, 55.7, 46.8, 43.2, 25.7, 18.0, -5.0; HRMS (ESI-TOF):  $m/z$  calcd for  $C_{25}H_{36}O_7SiNa$   $[M+Na]^+$ : 499.2123, found: 499.2115.

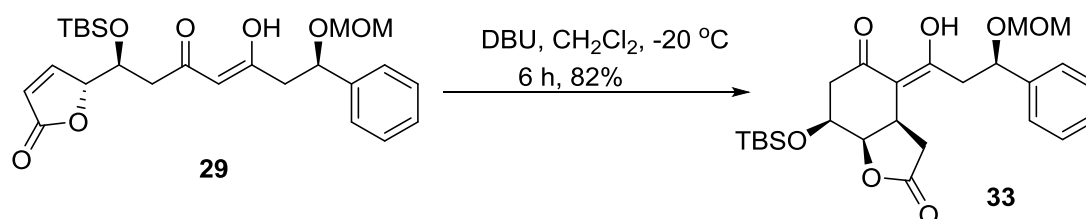

**Compound 33:** To a solution of **29** (120 mg, 0.25 mmol) in  $CH_2Cl_2$  (5 mL) was added DBU (41  $\mu$ L, 0.28 mmol) at  $-20\text{ }^\circ\text{C}$ . The mixture was stirred for 6 h, and quenched with sat.  $NH_4Cl$ , and extracted with  $CH_2Cl_2$  ( $3 \times 25$  mL). The combined organic layers were dried over anhydrous  $Na_2SO_4$  and concentrated in vacuo. The residue was purified by column chromatography using petroleum ether/EtOAc (4:1) to afford compound **33** (98 mg, 82%) as a yellowish oil:  $[\alpha]_D^{26} = +246.2^\circ$  ( $c = 0.52$ ,  $CHCl_3$ ); IR (neat)  $\nu_{max}$ : 3346, 2953, 2931, 2892, 1783, 1596, 1466, 1410, 1257, 1153, 1088, 840, 781  $cm^{-1}$ ;  $^1H$  NMR (400 MHz,  $CDCl_3$ )  $\delta$  16.69 (s, 1H), 7.36 – 7.34 (m, 4H), 7.33 – 7.27 (m, 1H), 5.21 (dd,  $J = 9.4, 4.4$  Hz, 1H), 4.55 (dd,  $J = 8.2, 2.8$  Hz, 1H), 4.46 (q,  $J = 6.9$  Hz, 2H), 4.30 (q,  $J = 3.2$  Hz, 1H), 3.45 (dt,  $J = 10.8, 9.5$  Hz, 1H), 3.26 (s, 3H), 2.94 (dd,  $J = 9.5, 4.4$  Hz, 1H), 2.90 (dd,  $J = 9.5, 1.3$  Hz, 1H), 2.80 (dd,  $J = 17.4, 11.1$  Hz, 1H), 2.61 – 2.54 (m, 3H), 0.85 (s, 9H), 0.09 (s, 6H);  $^{13}C$  NMR (100 MHz,  $CDCl_3$ )  $\delta$  194.3, 184.6, 176.3, 140.6, 128.7, 128.2, 126.6, 107.0, 93.9, 78.1, 74.4, 67.1, 55.6, 44.6, 38.7, 37.4, 33.8, 25.6, 17.8, -5.2, -5.3; HRMS (ESI-TOF):  $m/z$  calcd for  $C_{25}H_{37}O_7Si$   $[M+H]^+$ : 477.2303, found: 477.2302.

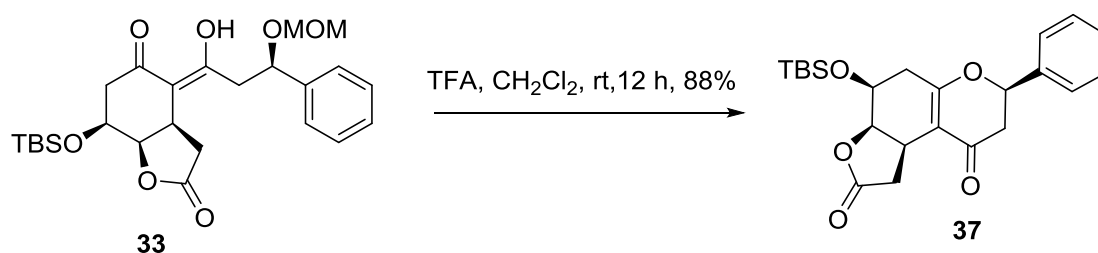

**Compound 37:** To a solution of **33** (56 mg, 0.12 mmol) in  $CH_2Cl_2$  (3 mL) was slowly added trifluoroacetic acid (0.6 mL) at  $0\text{ }^\circ\text{C}$ . The mixture was stirred at rt overnight, then it was diluted with water and extracted with  $CH_2Cl_2$  ( $3 \times 25$  mL). The organic phase was washed with sat.  $NaHCO_3$  and sat.  $NaCl$ , dried over  $Na_2SO_4$  and concentrated in vacuo. The residue was purified by flash column chromatography using petroleum ether/EtOAc (4:1 to 2:1) to afford compound **37** (44 mg, 88%) as a pale yellow oil:  $[\alpha]_D^{26} = +52.2^\circ$  ( $c = 0.74$ ,  $CHCl_3$ ); IR (neat)  $\nu_{max}$ : 2953, 2857, 1780, 1668, 1620, 1412, 1368, 1172, 1088, 938, 839, 781  $cm^{-1}$ ;  $^1H$  NMR (400 MHz,  $CDCl_3$ )  $\delta$  7.46 – 7.34 (m, 5H), 5.40 (dd,  $J = 14.1, 3.4$  Hz, 1H), 4.58 (dd,  $J = 8.2, 2.8$  Hz, 1H), 4.32 (dd,  $J = 6.4, 3.1$  Hz, 1H), 3.55 (dd,  $J = 18.9, 9.5$

Hz, 1H), 2.99 (dd,  $J = 17.6, 9.6$  Hz, 1H), 2.91 (dd,  $J = 16.7, 14.2$  Hz, 1H), 2.67 (dd,  $J = 16.7, 3.5$  Hz, 1H), 2.61 (ddd,  $J = 18.3, 2.8, 1.5$  Hz, 1H), 2.54 (dd,  $J = 18.3, 3.7$  Hz, 1H), 2.38 (dd,  $J = 17.6, 10.7$  Hz, 1H), 0.87 (s, 9H), 0.11 (s, 3H), 0.09 (s, 3H);  $^{13}\text{C}$  NMR (100 MHz,  $\text{CDCl}_3$ )  $\delta$  190.8, 176.9, 167.4, 137.8, 129.1, 128.9, 126.1, 111.4, 80.8, 78.0, 67.1, 42.9, 35.1, 34.9, 31.9, 25.7, 17.9,  $-5.1, -5.3$ ; HRMS (ESI-TOF):  $m/z$  calcd for  $\text{C}_{23}\text{H}_{31}\text{O}_5\text{Si}$   $[\text{M}+\text{H}]^+$ : 415.1935, found: 415.1941.

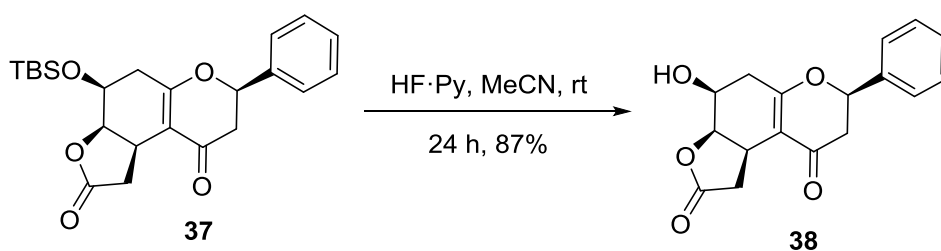

**Compound 38:** To a solution of **37** (58 mg, 0.14 mmol) in anhydrous  $\text{CH}_3\text{CN}$  (2.3 mL) was added HF Py complex (70%, 0.23 mL) at  $0^\circ\text{C}$ . The reaction was slowly warmed to rt and stirred for 24 h, then it was diluted with water and extracted with ethyl acetate. The organic phase was washed with sat.  $\text{NaHCO}_3$ , dried over  $\text{Na}_2\text{SO}_4$  and concentrated in vacuo. The residue was purified by flash column chromatography using petroleum ether/ EtOAc (1:1) to afford compound **38** (37 mg, 87%) as a colorless oil:  $[\alpha]_{\text{D}}^{26} = +62.7^\circ$  ( $c = 0.52$ ,  $\text{CHCl}_3$ ); IR (neat)  $\nu_{\text{max}}$ : 3436, 2920, 1773, 1662, 1612, 1416, 1330, 1173, 1074, 758  $\text{cm}^{-1}$ ;  $^1\text{H}$  NMR (400 MHz,  $\text{CDCl}_3$ )  $\delta$  7.45 – 7.36 (m, 5H), 5.41 (dd,  $J = 14.1, 3.4$  Hz, 1H), 4.70 (dd,  $J = 7.8, 2.7$  Hz, 1H), 4.33 (s, 1H), 3.59 (q,  $J = 8.7$  Hz, 1H), 3.29 (d,  $J = 4.1$  Hz, 1H), 3.04 – 2.93 (m, 2H), 2.74 – 2.59 (m, 3H), 2.49 (dd,  $J = 17.9, 8.7$  Hz, 1H);  $^{13}\text{C}$  NMR (100 MHz,  $\text{CDCl}_3$ )  $\delta$  191.1, 177.6, 167.7, 137.7, 129.0, 128.9, 126.2, 110.8, 81.0, 78.7, 66.1, 42.8, 34.9, 33.6, 32.0; HRMS (ESI-TOF):  $m/z$  calcd for  $\text{C}_{17}\text{H}_{17}\text{O}_5$   $[\text{M}+\text{H}]^+$ : 301.1071, found: 301.1072.

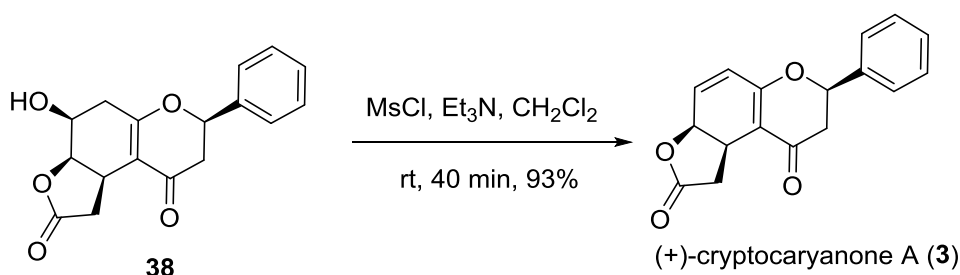

**(+)-Cryptocaryanone A (3):** To a solution of **38** (30 mg, 0.10 mmol) in  $\text{CH}_2\text{Cl}_2$  (2 mL) were slowly added  $\text{Et}_3\text{N}$  (0.14 mL, 1.0 mmol) and  $\text{MsCl}$  (31  $\mu\text{L}$ , 0.4 mmol) at  $0^\circ\text{C}$ . The mixture was stirred at rt for 40 min, then it was quenched with water and extracted with  $\text{CH}_2\text{Cl}_2$  ( $3 \times 25$  mL). The combined organic layers were dried over anhydrous  $\text{Na}_2\text{SO}_4$  and concentrated in vacuo. The residue was purified by column chromatography using petroleum ether/ EtOAc (4:1 to 2:1) to afford (+)-**3** (26 mg, 93%) as a white powder.  $[\alpha]_{\text{D}}^{26} = +182.3^\circ$  ( $c = 0.44$ ,  $\text{CHCl}_3$ ); IR (neat)  $\nu_{\text{max}}$ : 2925, 1779, 1655, 1588, 1426, 1377,

1324, 1167, 1012, 758  $\text{cm}^{-1}$ ;  $^1\text{H}$  NMR (400 MHz,  $\text{CDCl}_3$ )  $\delta$  7.47 – 7.37 (m, 5H), 6.28 (dd,  $J$  = 10.0, 2.8 Hz, 1H), 6.09 (dd,  $J$  = 10.0, 2.0 Hz, 1H), 5.51 – 5.44 (m, 2H), 3.87 (dt,  $J$  = 10.4, 9.2 Hz, 1H), 2.98 (dd,  $J$  = 18.0, 9.2 Hz, 1H), 2.92 (dd,  $J$  = 14.0, 9.4 Hz, 1H), 2.72 (dd,  $J$  = 17.1, 3.6 Hz, 1H), 2.39 (dd,  $J$  = 17.9, 10.5 Hz, 1H);  $^{13}\text{C}$  NMR (100 MHz,  $\text{CDCl}_3$ )  $\delta$  190.3, 175.4, 162.6, 137.5, 134.7, 129.2, 129.0, 126.2, 124.1, 108.8, 80.9, 76.5, 42.8, 33.2, 30.6; HRMS (ESI-TOF):  $m/z$  calcd for  $\text{C}_{17}\text{H}_{15}\text{O}_4$   $[\text{M}+\text{H}]^+$ : 283.0965, found: 283.0962.

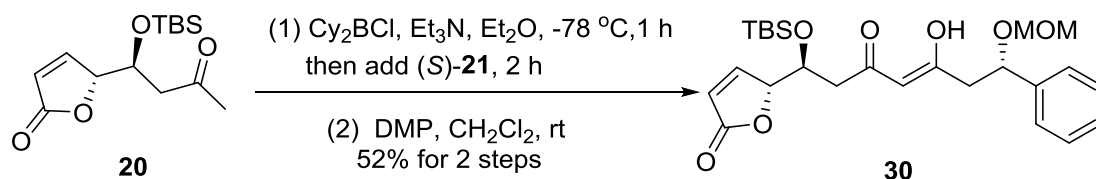

**Compound 30:** To a solution of **20** (260 mg, 0.92 mmol) in dry  $\text{Et}_2\text{O}$  (9 mL) was slowly added  $\text{Et}_3\text{N}$  (0.26 mL, 1.84 mmol) and  $\text{Cy}_2\text{BCl}$  (1.56 mL, 1 M in hexanes, 1.56 mmol) at  $-78^\circ\text{C}$  under an argon atmosphere successively. The resulting mixture was stirred at the same temperature for 1 h, then a solution of aldehyde (S)-**21** (230 mg, 1.2 mmol) of  $\text{Et}_2\text{O}$  (2 mL) was added at  $-78^\circ\text{C}$ . The mixture was stirred at  $-78^\circ\text{C}$  for 2 h, then quenched by the addition of MeOH (2 mL) and pH  $\approx$  7 buffer (0.5 mL), followed by MeOH (2 mL) and 30%  $\text{H}_2\text{O}_2$  solution (1 mL) at  $0^\circ\text{C}$ . The reaction mixture was warmed to rt and stirred for 0.5 h before being diluted with  $\text{H}_2\text{O}$  and  $\text{EtOAc}$ . The layers were separated and the aqueous phase was extracted with  $\text{EtOAc}$  ( $3 \times 25$  mL). The combined organic layers were dried over anhydrous  $\text{Na}_2\text{SO}_4$  and concentrated in vacuo. The residue was purified by column chromatography using petroleum ether/  $\text{EtOAc}$  (2:1) to afford a mixture of two isomers.

To a solution of the above mixture in  $\text{CH}_2\text{Cl}_2$  (12 mL) was added Dess–Martin periodinane (434 mg, 1.0 mmol) at  $0^\circ\text{C}$ . The mixture was stirred at rt for 40 min, then it was quenched with a mixture of sat.  $\text{NaHCO}_3$  (10 mL), sat.  $\text{Na}_2\text{S}_2\text{O}_3$  (10 mL) and  $\text{H}_2\text{O}$  (10 mL) and extracted with  $\text{CH}_2\text{Cl}_2$  ( $3 \times 30$  mL). The combined organic layers were dried over anhydrous  $\text{Na}_2\text{SO}_4$  and concentrated in vacuo. The residue was purified by column chromatography using petroleum ether/  $\text{EtOAc}$  (4:1) to afford compound **30** (228 mg, 52% for 2 steps) as a brown oil:  $[\alpha]_{\text{D}}^{26} = -26.7^\circ$  ( $c$  = 0.58,  $\text{CHCl}_3$ ); IR (neat)  $\nu_{\text{max}}$ : 3381, 2931, 2857, 1760, 1604, 1465, 1256, 1154, 1097, 1051, 835, 778  $\text{cm}^{-1}$ ;  $^1\text{H}$  NMR (400 MHz,  $\text{CDCl}_3$ )  $\delta$  15.40 (br s, 1H), 7.48 (dd,  $J$  = 5.8, 1.4 Hz, 1H), 7.36 – 7.27 (m, 5H), 6.17 (dd,  $J$  = 5.6, 2.0 Hz, 1H), 5.56 (s, 1H), 5.09 (dd,  $J$  = 9.2, 4.7 Hz, 1H), 5.00 – 4.96 (m, 1H), 4.50 (s, 2H), 4.32 (dd,  $J$  = 10.7, 6.1 Hz, 1H), 3.29 (s, 3H), 2.81 (dd,  $J$  = 14.7, 9.2 Hz, 1H), 2.62 (dd,  $J$  = 14.7, 4.7 Hz, 1H), 2.54 (dd,  $J$  = 6.2, 1.9 Hz, 2H), 0.81 (s, 9H), 0.05 (s, 3H),  $-0.03$  (s, 3H);  $^{13}\text{C}$  NMR (100 MHz,  $\text{CDCl}_3$ )  $\delta$  190.9, 189.8, 172.6, 153.0, 140.5, 128.6, 128.2, 126.8, 123.1, 102.5, 94.1, 85.3, 74.3, 69.4, 55.6, 46.8, 43.2, 25.6, 18.0,  $-4.9$ ,  $-5.0$ ; HRMS (ESI-TOF):  $m/z$  calcd for  $\text{C}_{25}\text{H}_{37}\text{O}_7\text{Si}$   $[\text{M}+\text{H}]^+$ : 477.2303, found: 477.2302.

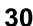

35

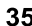

39

32.2, 25.6, 17.9, -5.0, -5.1. HRMS (ESI-TOF):  $m/z$  calcd for  $C_{23}H_{31}O_5Si$   $[M+H]^+$ : 415.1935, found: 415.1938.

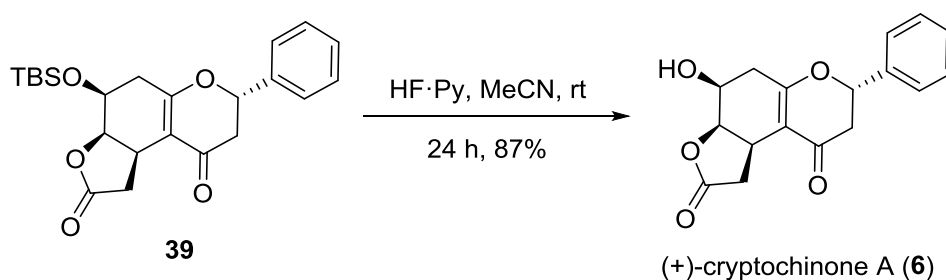

**(+)-Cryptochinone A (6):** To a solution of **39** (84 mg, 0.20 mmol) in anhydrous  $CH_3CN$  (2 mL) was added HF Py complex (70%, 0.2 mL) at 0 °C. The reaction was slowly warmed to rt and stirred for 24 h. The mixture was diluted with water and extracted with ethyl acetate. The organic phase was washed with sat.  $NaHCO_3$ , dried over  $Na_2SO_4$  and concentrated in vacuo. The residue was purified by flash column chromatography using PE-EtOAc (1:1) to afford (+)-**6** (51 mg, 86%) as a colorless solid: m.p. 194 – 195 °C;  $[\alpha]_D^{26} = +196.7^\circ$  ( $c = 0.15$ ,  $CHCl_3$ ); IR (neat)  $\nu_{max}$ : 3445, 2977, 1774, 1660, 1620, 1417, 1167, 1080, 1048, 757  $cm^{-1}$ ;  $^1H$  NMR (400 MHz,  $CDCl_3$ )  $\delta$  7.46 – 7.36 (m, 5H), 5.40 (dd,  $J = 14.8, 3.6$  Hz, 1H), 4.80 (dd,  $J = 6.6, 2.4$  Hz, 1H), 4.17 (br s, 1H), 3.57 – 3.50 (m, 1H), 3.02 (dd,  $J = 18.0, 8.8$  Hz, 1H), 2.88 (dd,  $J = 17.1, 14.7$  Hz, 1H), 2.71 – 2.63 (m, 3H), 2.56 (dd,  $J = 18.0, 4.0$  Hz, 1H);  $^{13}C$  NMR (100 MHz,  $CDCl_3$ )  $\delta$  190.8, 176.8, 168.5, 137.5, 129.1, 128.9, 126.3, 110.7, 80.5, 79.6, 66.6, 42.5, 36.6, 32.6, 32.4; HRMS (ESI-TOF):  $m/z$  calcd for  $C_{17}H_{16}O_5Na$   $[M+Na]^+$ : 323.0895, found: 323.0891.

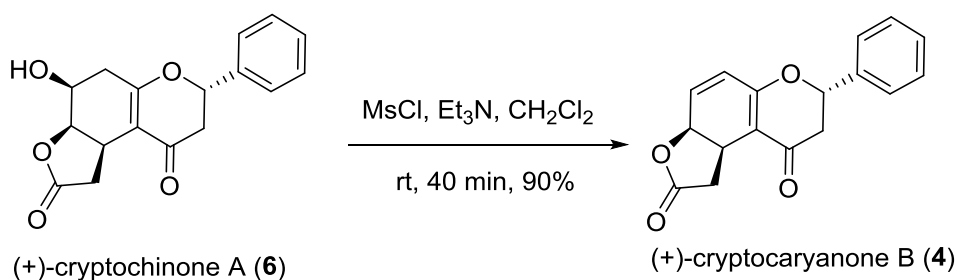

**(+)-Cryptocaryanone B (4):** To a solution of **6** (33 mg, 0.11 mmol) in  $CH_2Cl_2$  (2 mL) were added  $Et_3N$  (0.15 mL, 1.1 mmol) and  $MsCl$  (34  $\mu L$ , 0.44 mmol) at 0 °C successively. The mixture was stirred at rt for 40 min, then it was quenched with water and extracted with  $CH_2Cl_2$  ( $3 \times 25$  mL). The combined organic layers were dried over anhydrous  $Na_2SO_4$  and concentrated in vacuo. The residue was purified by column chromatography using petroleum ether/ EtOAc (4:1 to 2:1) to afford (+)-**4** (28 mg, 90%) as a white powder:  $[\alpha]_D^{26} = +265.2^\circ$  ( $c = 0.40$ ,  $CHCl_3$ ); IR (neat)  $\nu_{max}$ : 2923, 1773, 1654, 1586, 1426, 1378, 1309, 1169, 1005, 760  $cm^{-1}$ ;  $^1H$  NMR (400 MHz,  $CDCl_3$ )  $\delta$  7.46 – 7.37 (m, 5H), 6.35 (dd,  $J = 10.0, 3.6$  Hz, 1H), 6.14 (dd,  $J = 10.0, 1.6$  Hz, 1H), 5.46 – 5.38 (m, 2H), 3.76 (td,  $J = 9.5, 7.9$  Hz, 1H), 3.01 (dd,  $J = 18.0, 9.2$  Hz, 1H), 2.90 (dd,  $J = 17.2, 14.4$  Hz, 1H), 2.69 (dd,  $J = 17.2, 3.6$  Hz, 1H), 2.63 (dd,  $J = 18.0,$

8.0 Hz, 1H);  $^{13}\text{C}$  NMR (100 MHz,  $\text{CDCl}_3$ )  $\delta$  190.3, 175.5, 162.8, 137.4, 134.1, 129.1, 128.9, 126.2, 125.2, 109.3, 80.6, 76.1, 42.4, 34.5, 30.8; HRMS (ESI-TOF):  $m/z$  calcd for  $\text{C}_{17}\text{H}_{15}\text{O}_4$   $[\text{M}+\text{H}]^+$ : 283.0965, found: 283.0963.

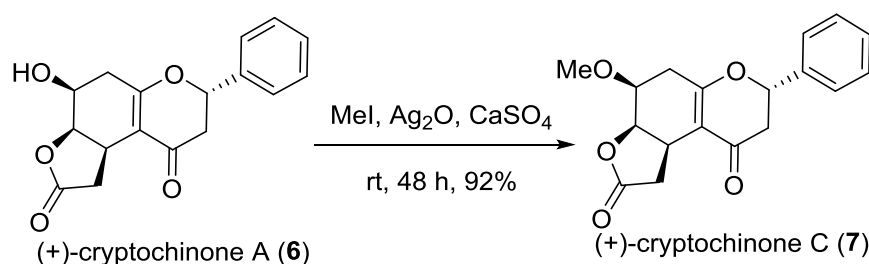

**(+)-Cryptochinone C (7):** To a solution of **6** (17 mg, 0.057 mmol) in iodomethane (2 mL) were slowly added silver oxide (33 mg, 0.14 mmol) and calcium sulfate at rt. The mixture was stirred in the dark for 48 h, diluted with EtOAc, and filtered through a plug of Celite. The filtrate was concentrated in vacuo, and the residue was purified by column chromatography using petroleum ether/ EtOAc (1:1) to afford (+)-**7** (16.5 mg, 92%) as a colorless oil:  $[\alpha]_{\text{D}}^{26} = +176.7^\circ$  ( $c = 0.13$ ,  $\text{CHCl}_3$ ); IR (neat)  $\nu_{\text{max}}$ : 2925, 1778, 1665, 1614, 1413, 1372, 1315, 1167, 1101, 1020, 964, 761  $\text{cm}^{-1}$ ;  $^1\text{H}$  NMR (400 MHz,  $\text{CDCl}_3$ )  $\delta$  7.46 – 7.37 (m, 5H), 5.40 (dd,  $J = 14.6, 3.4$  Hz, 1H), 4.81 (dd,  $J = 6.4, 2.4$  Hz, 1H), 3.72 (ddd,  $J = 7.6, 5.2, 2.5$  Hz, 1H), 3.52 – 3.45 (m, 1H), 3.44 (s, 3H), 2.97 (dd,  $J = 17.6, 8.8$  Hz, 1H), 2.87 (dd,  $J = 17.1, 14.6$  Hz, 1H), 2.75 – 2.63 (m, 3H), 2.53 (dd,  $J = 17.6, 4.8$  Hz, 1H);  $^{13}\text{C}$  NMR (100 MHz,  $\text{CDCl}_3$ )  $\delta$  190.7, 176.5, 168.4, 137.5, 129.1, 128.9, 126.3, 110.9, 80.5, 77.2, 75.4, 57.6, 42.6, 36.2, 32.9, 29.6; HRMS (ESI-TOF):  $m/z$  calcd for  $\text{C}_{18}\text{H}_{19}\text{O}_5\text{Na}$   $[\text{M}+\text{Na}]^+$ : 337.1052, found: 337.1050.



# Copies of $^1\text{H}$ and $^{13}\text{C}$ NMR spectra for compounds

## $^1\text{H}$ NMR spectrum of compound 17 (400 MHz, $\text{CDCl}_3$ )

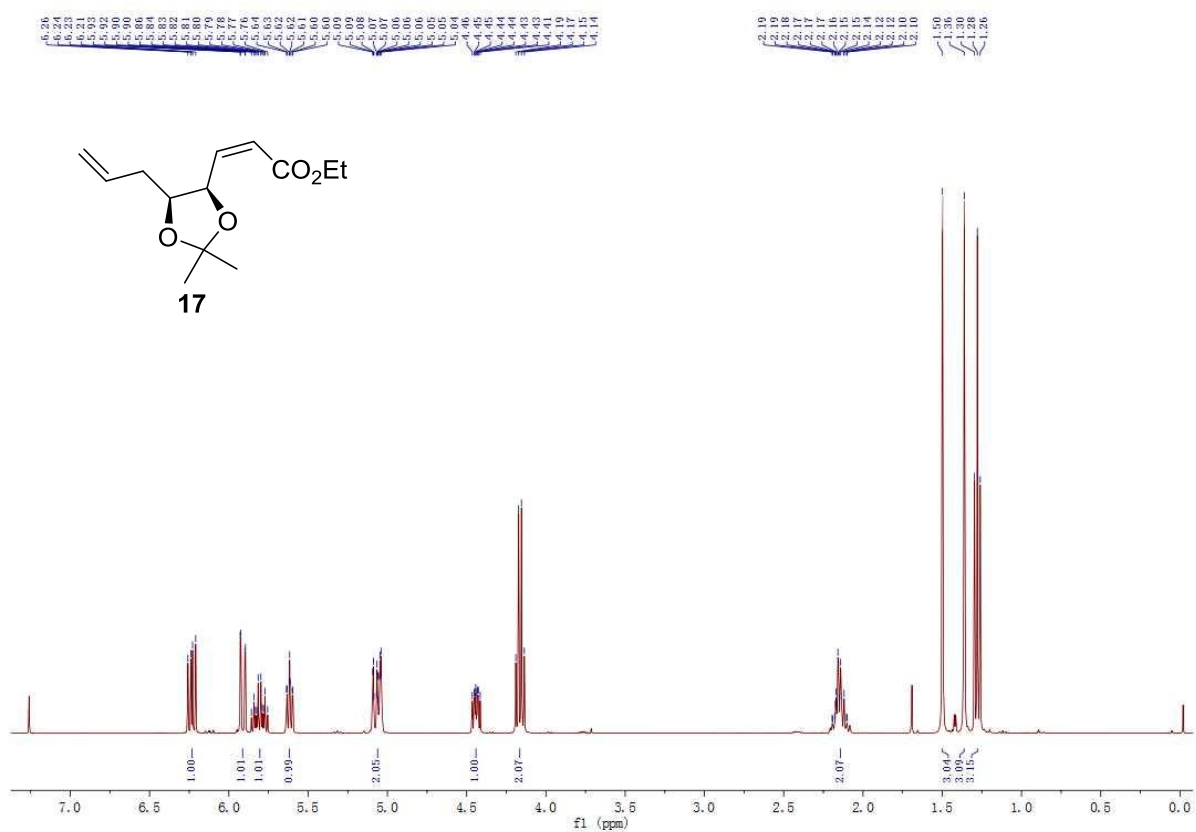

## $^{13}\text{C}$ NMR spectrum of compound 17 (100 MHz, $\text{CDCl}_3$ )

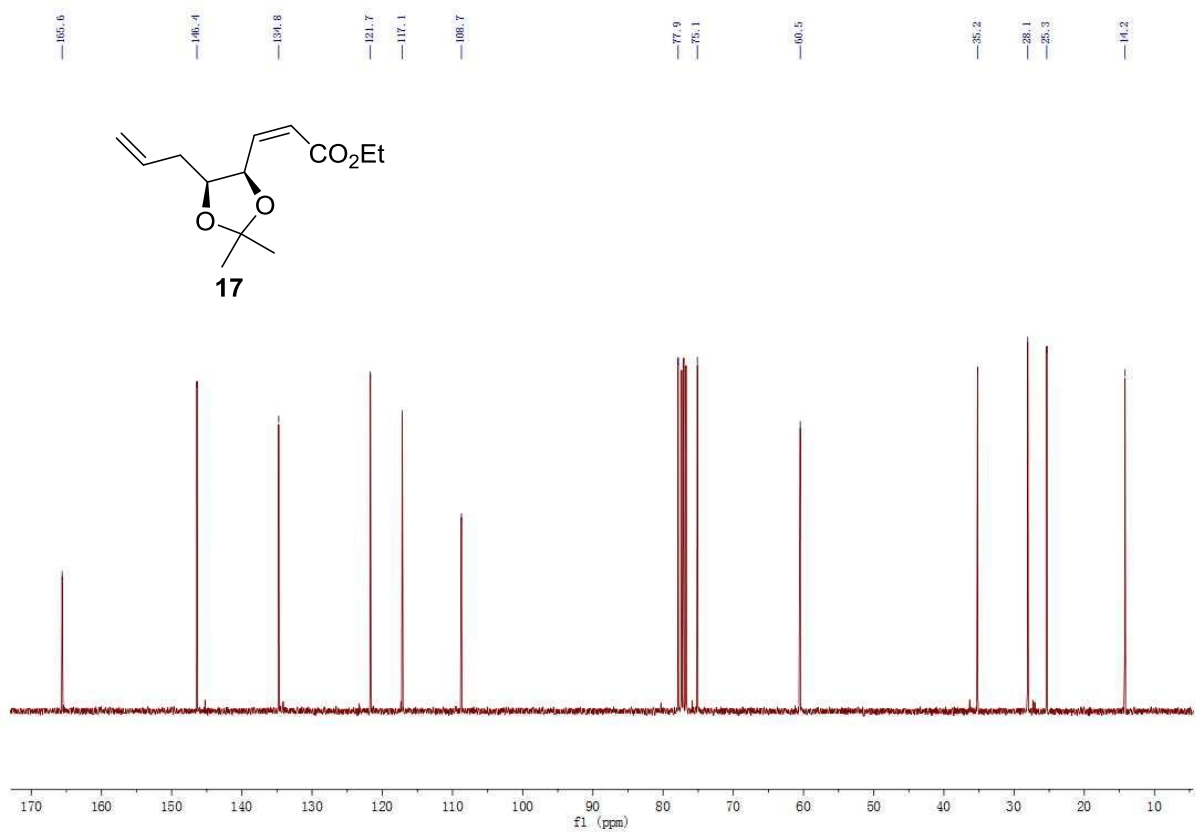



**$^1\text{H}$  NMR spectrum of compound 18 (400 MHz,  $\text{CDCl}_3$ )**

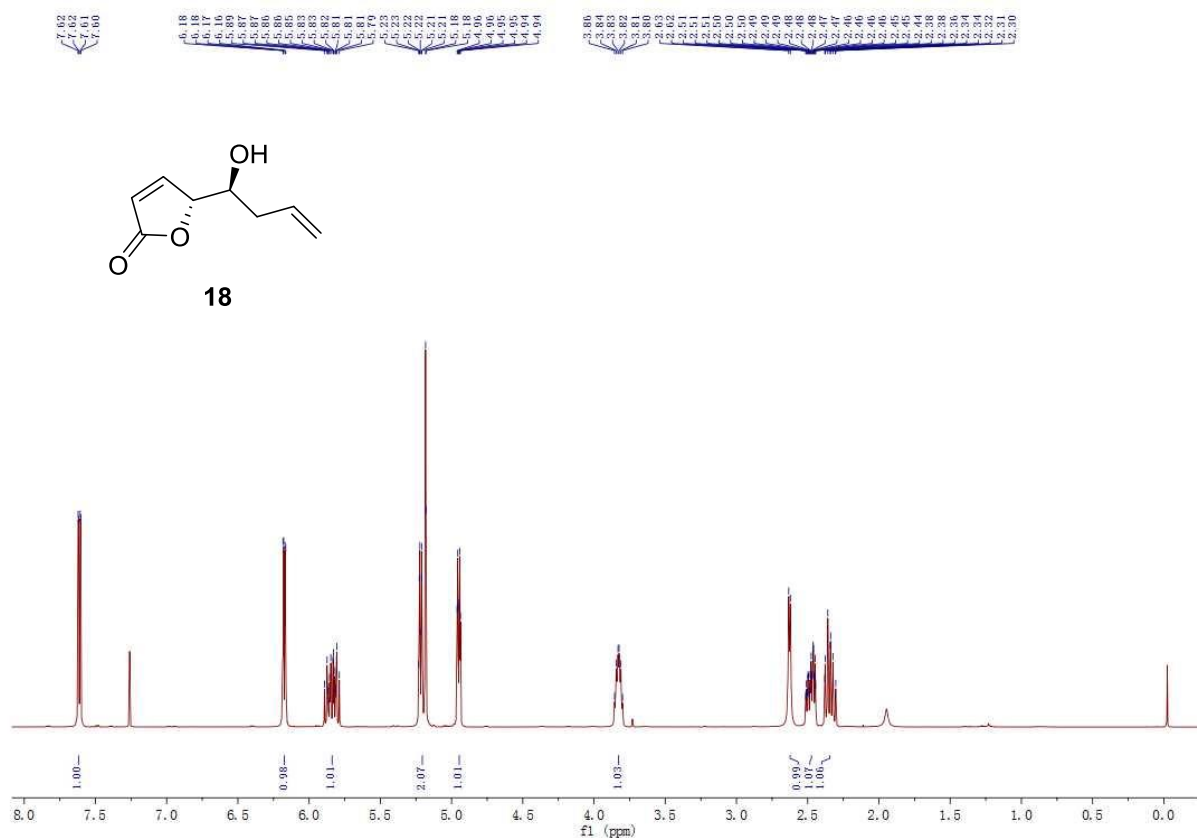

**$^{13}\text{C}$  NMR spectrum of compound 18 (100 MHz,  $\text{CDCl}_3$ )**

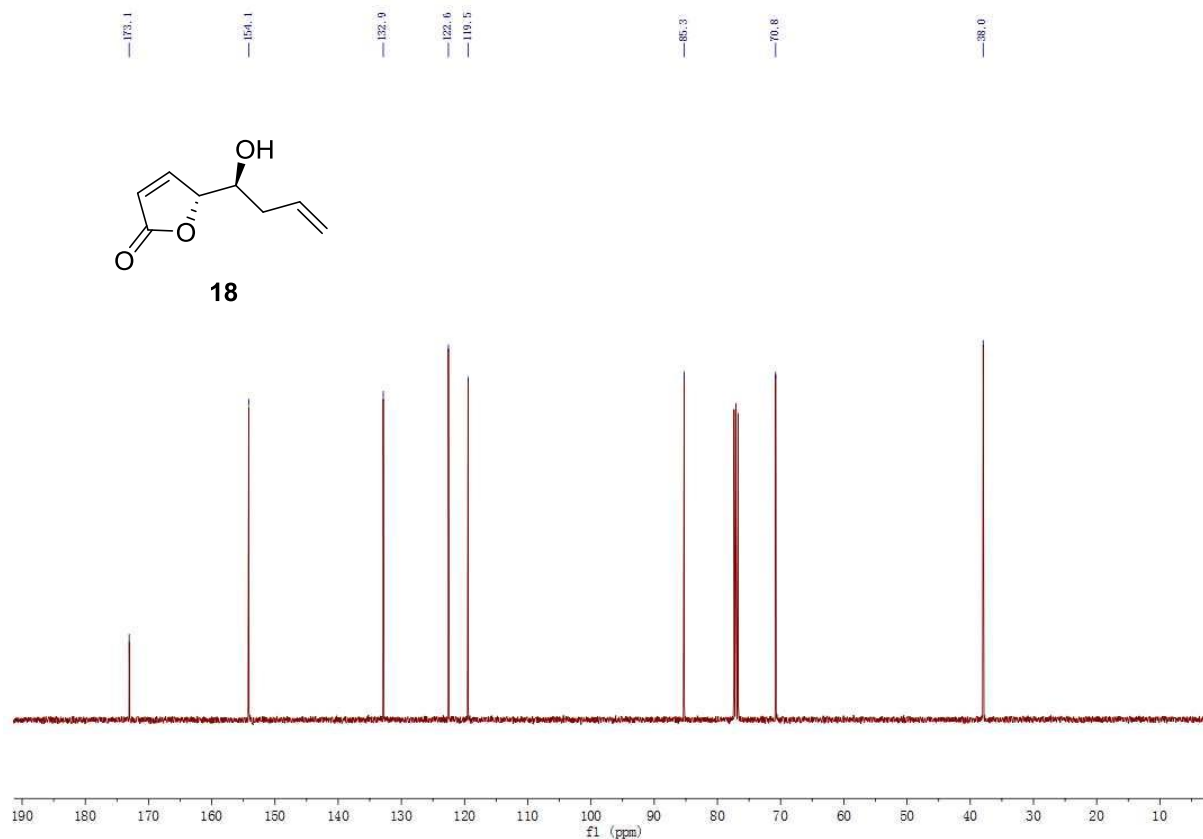

**$^1\text{H}$  NMR spectrum of compound 19 (400 MHz,  $\text{CDCl}_3$ )**

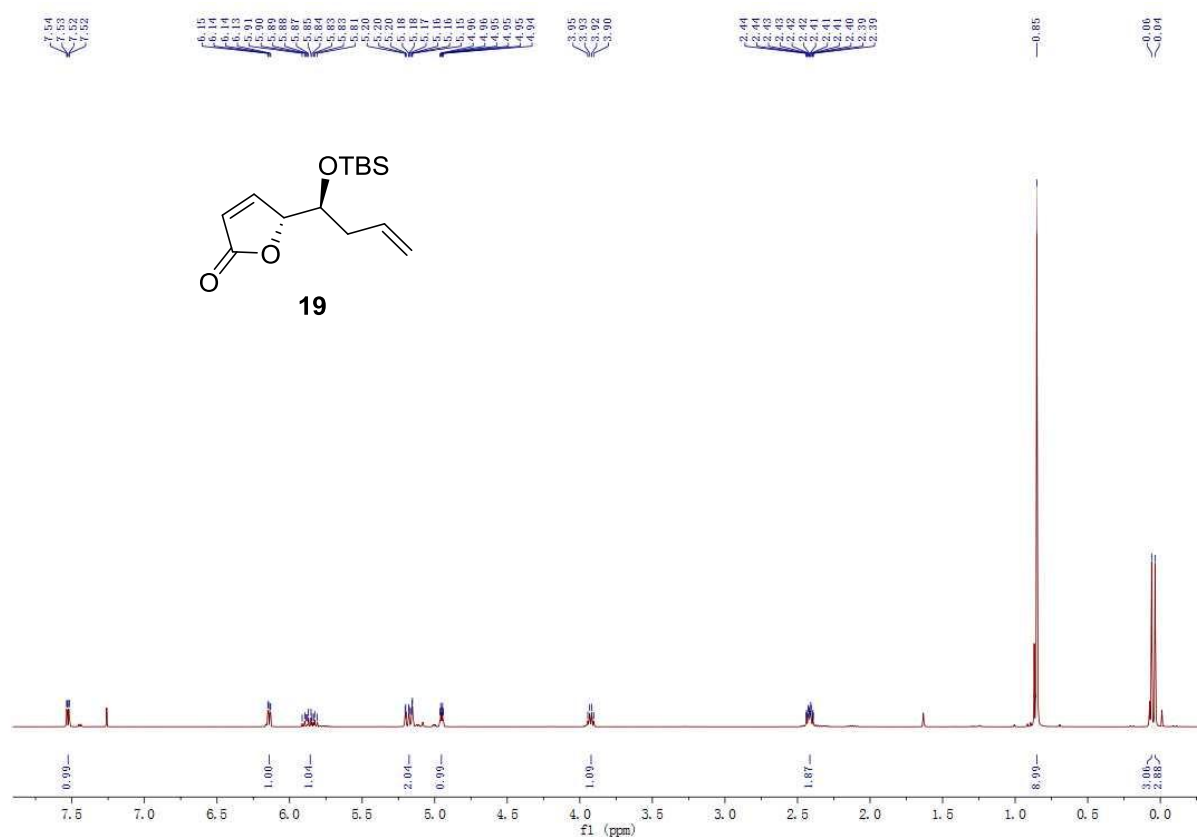

**$^{13}\text{C}$  NMR spectrum of compound 19 (100 MHz,  $\text{CDCl}_3$ )**

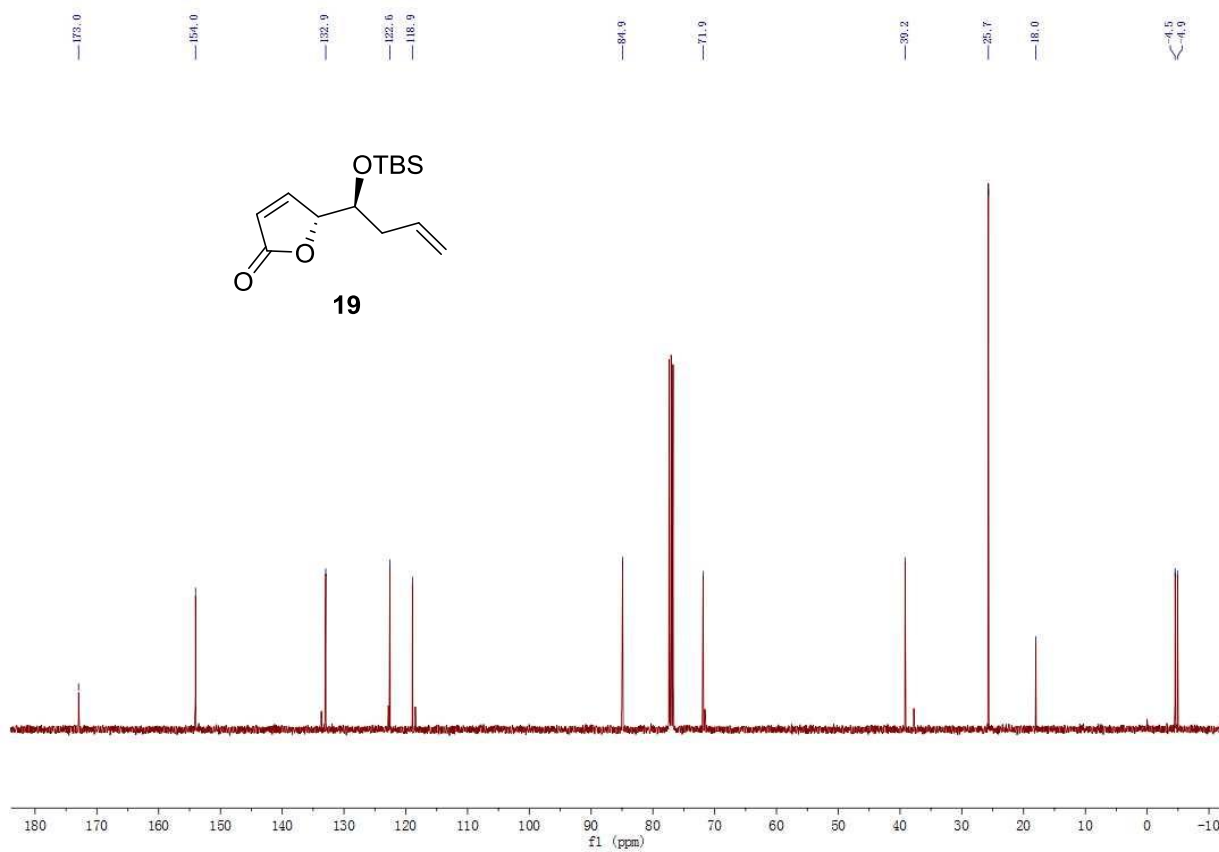

**$^1\text{H}$  NMR spectrum of compound 20 (400 MHz,  $\text{CDCl}_3$ )**

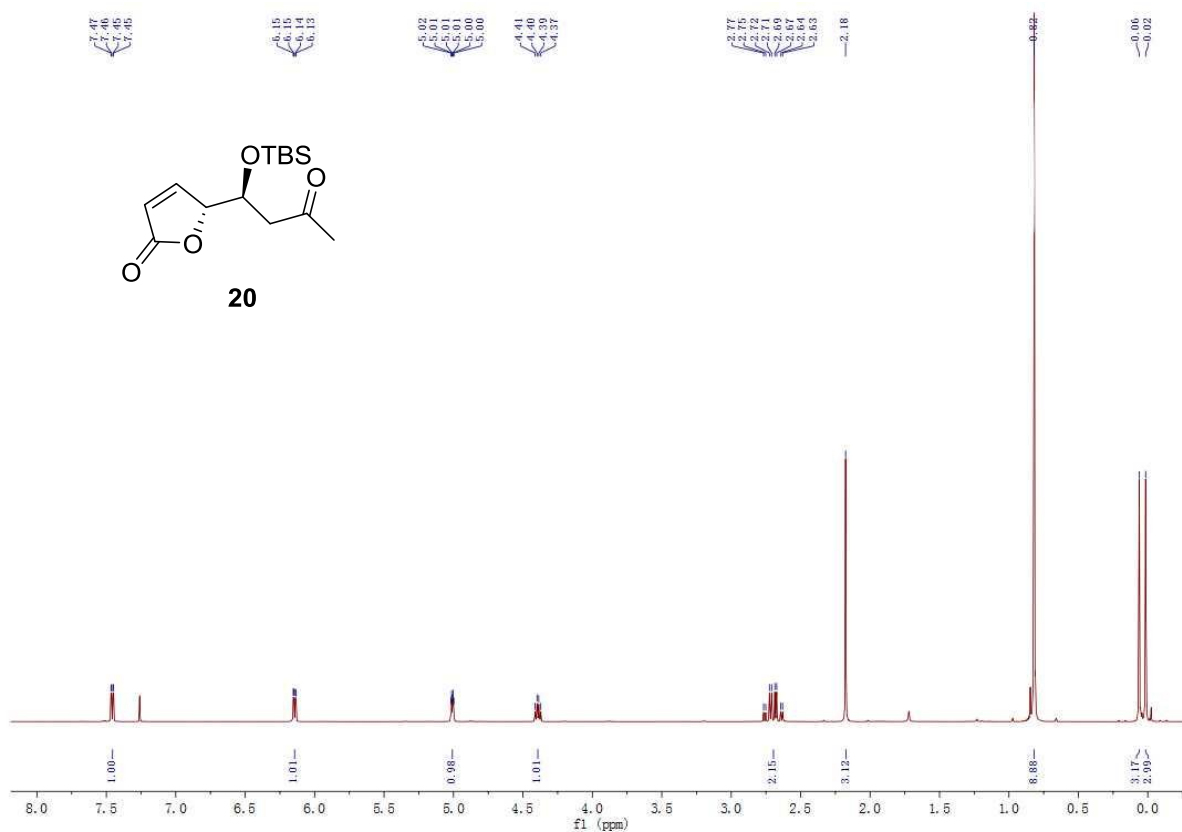

**$^{13}\text{C}$  NMR spectrum of compound 20 (100 MHz,  $\text{CDCl}_3$ )**

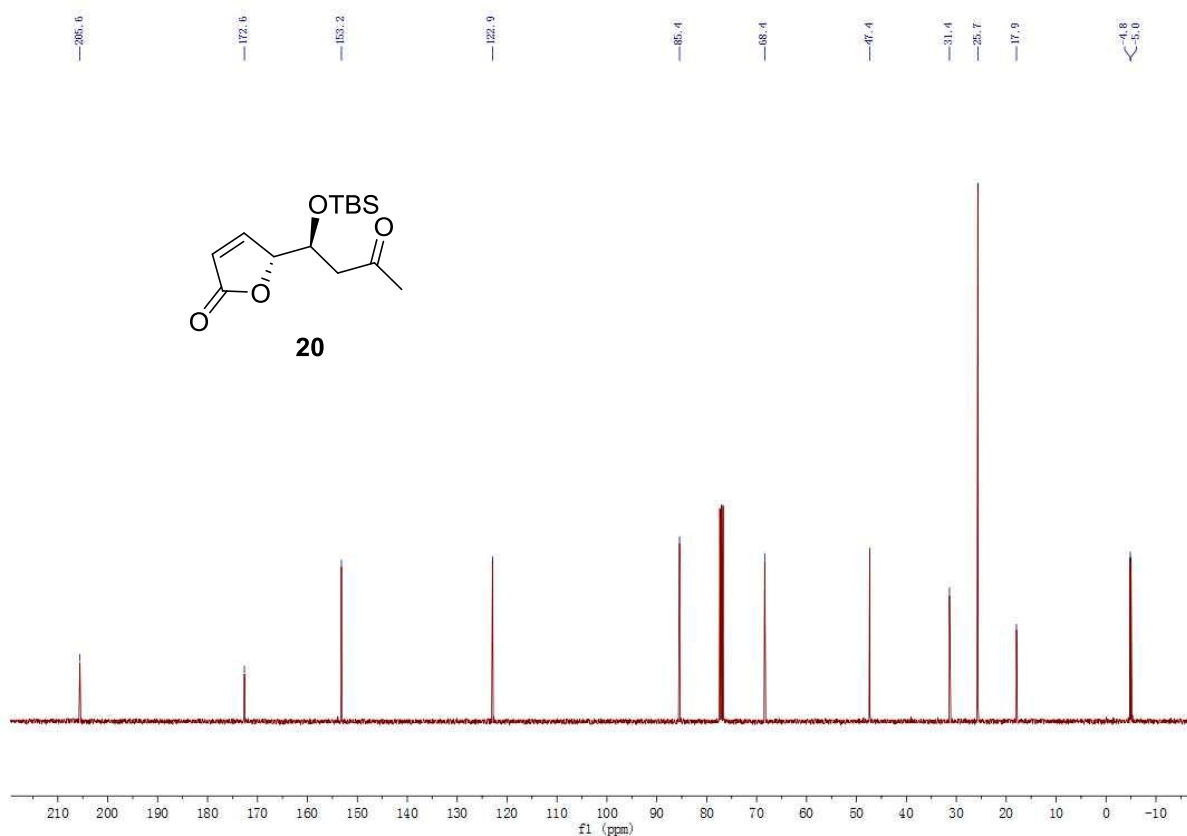

**$^1\text{H}$  NMR spectrum of compound 23 (400 MHz,  $\text{CDCl}_3$ )**

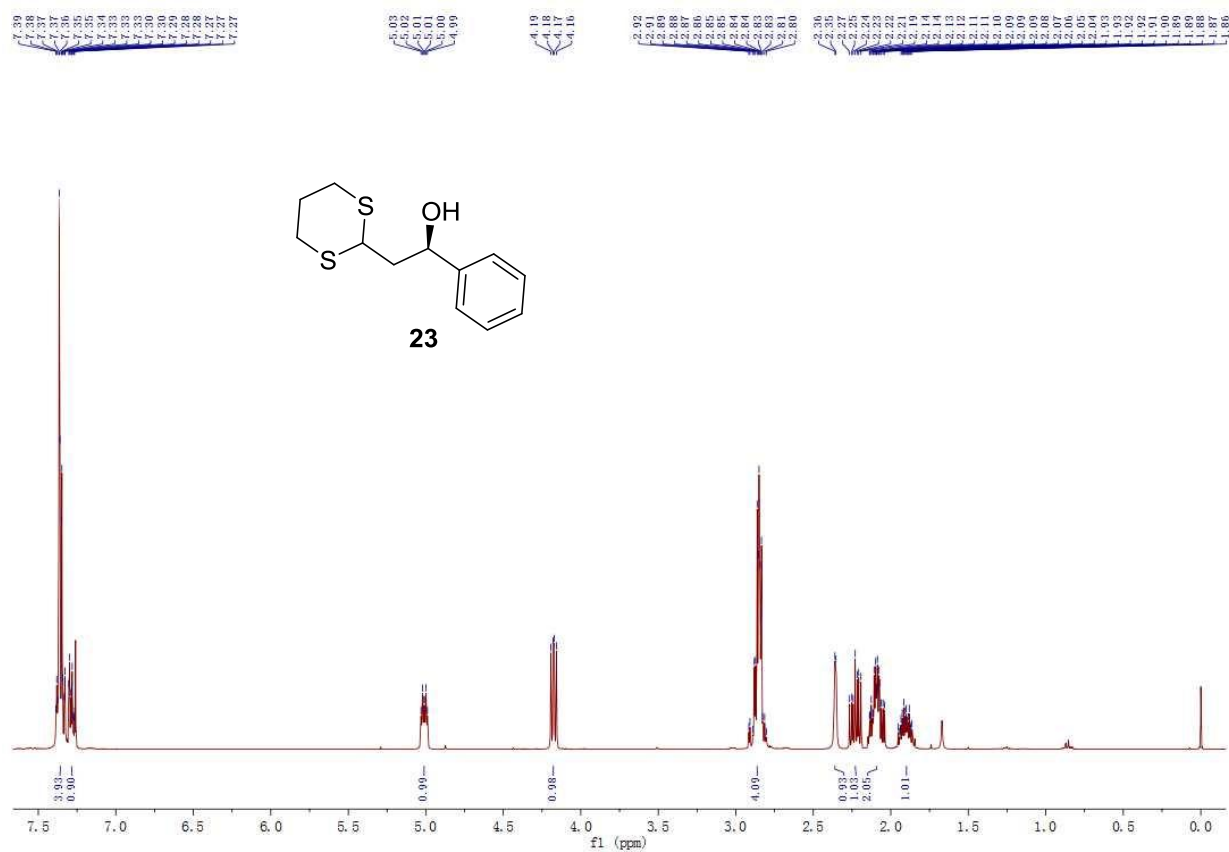

**$^{13}\text{C}$  NMR spectrum of compound 23 (100 MHz,  $\text{CDCl}_3$ )**

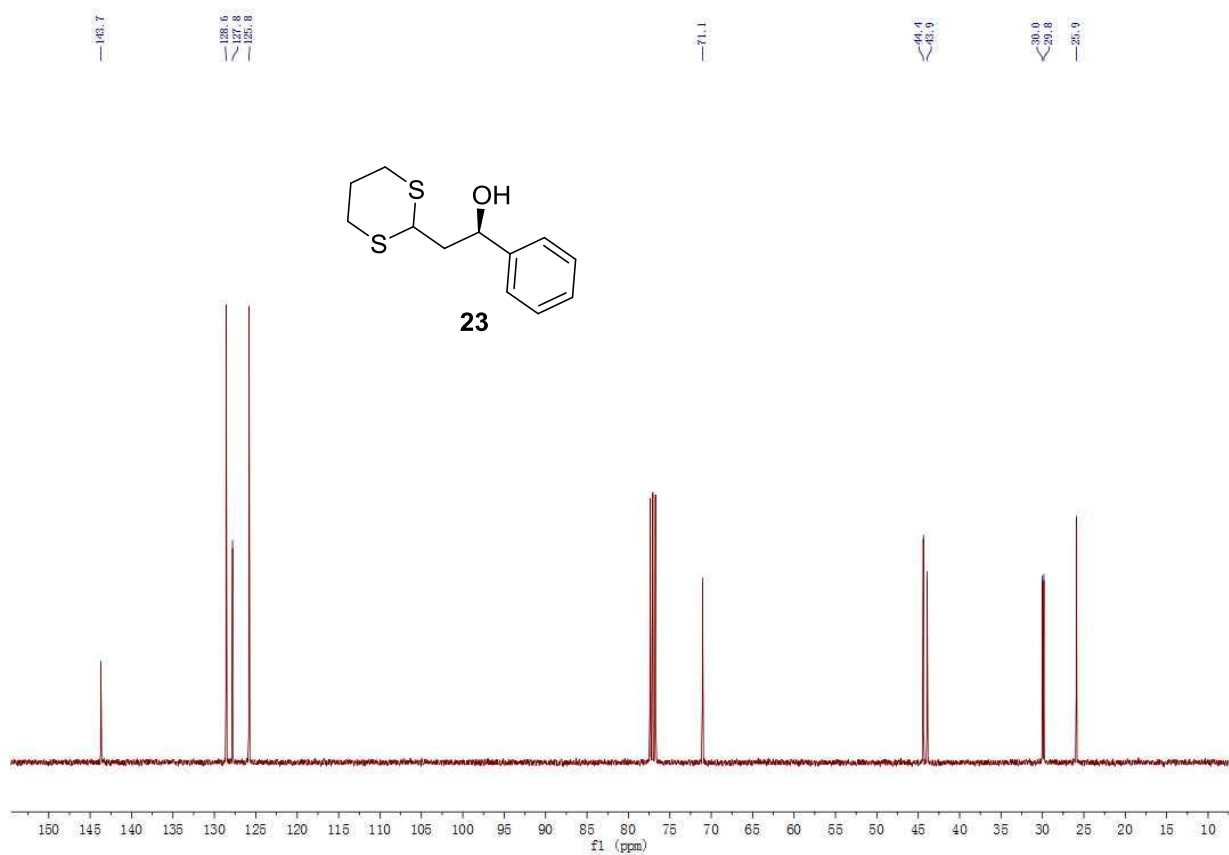

**$^1\text{H}$  NMR spectrum of compound 24 (400 MHz,  $\text{CDCl}_3$ )**

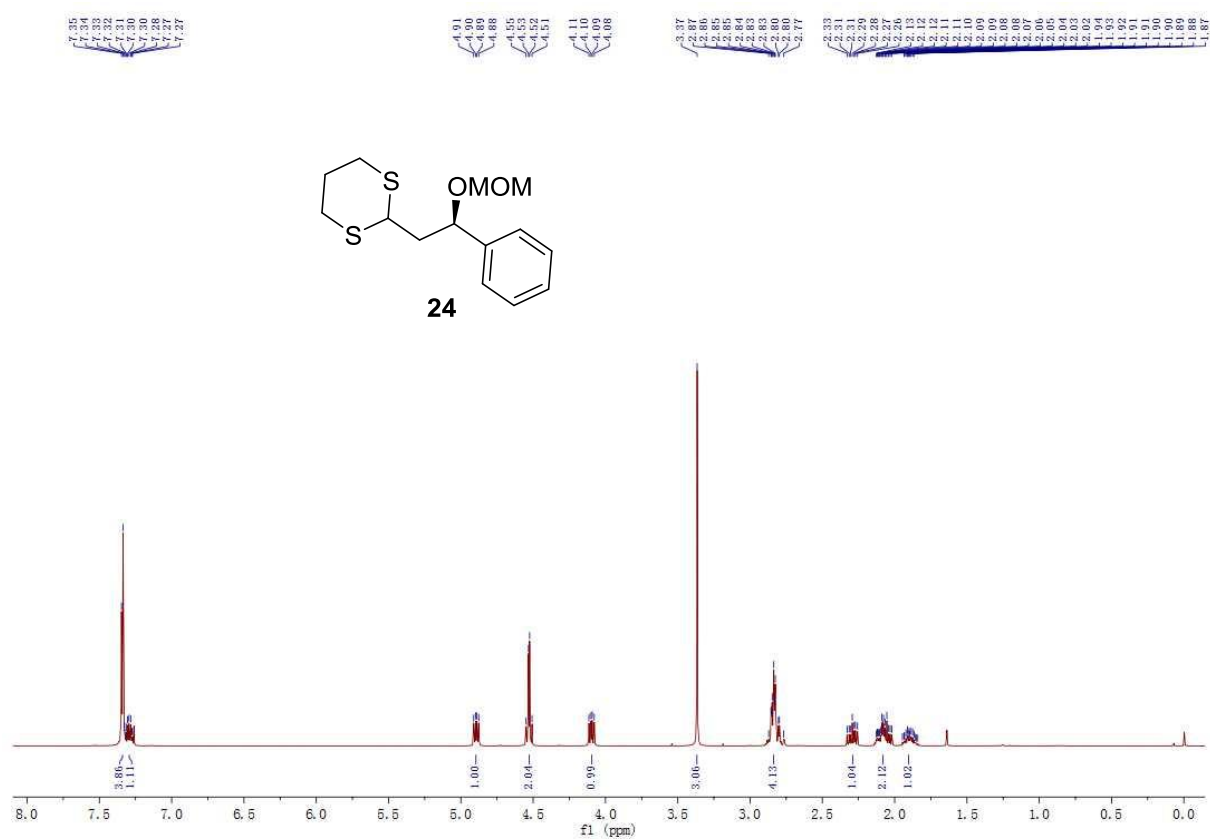

**$^{13}\text{C}$  NMR spectrum of compound 24 (100 MHz,  $\text{CDCl}_3$ )**

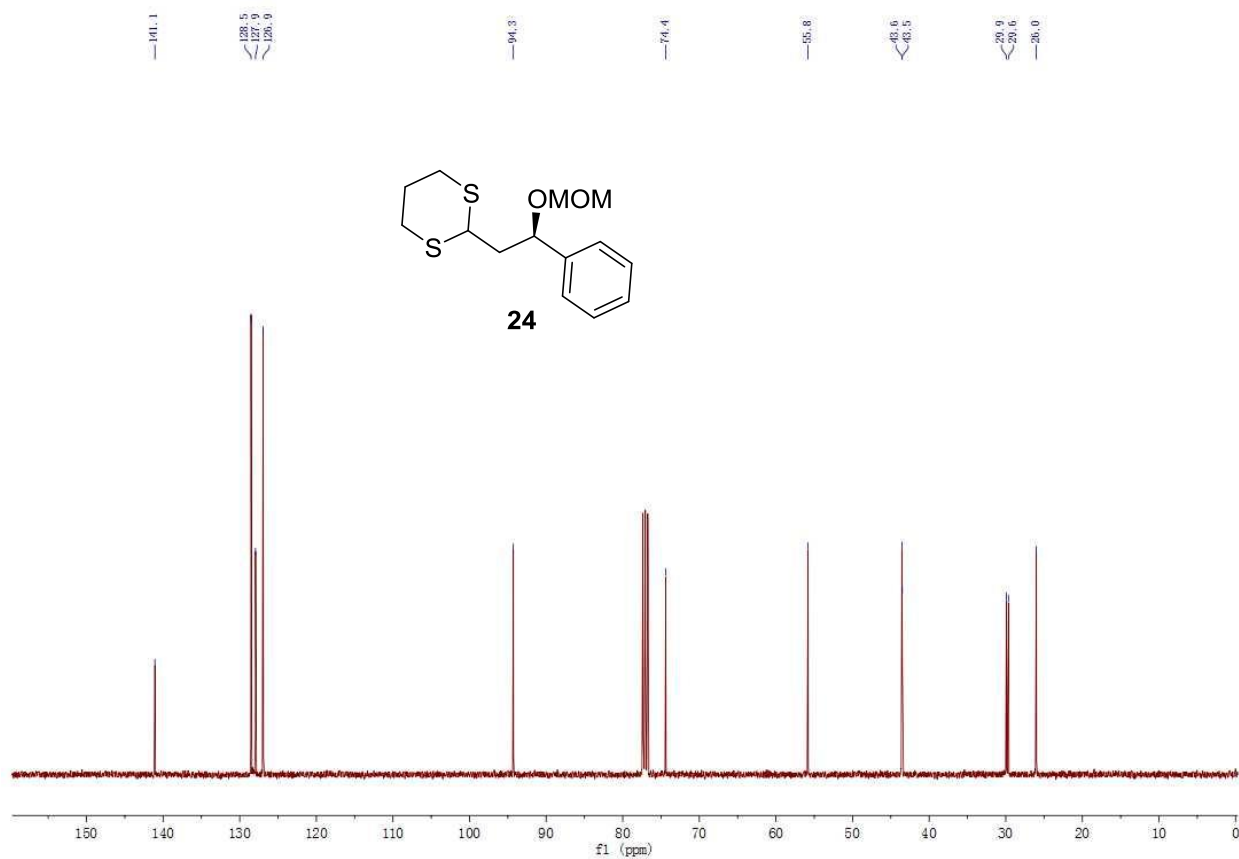

**$^1\text{H}$  NMR spectrum of compound (R)-21 (400 MHz,  $\text{CDCl}_3$ )**

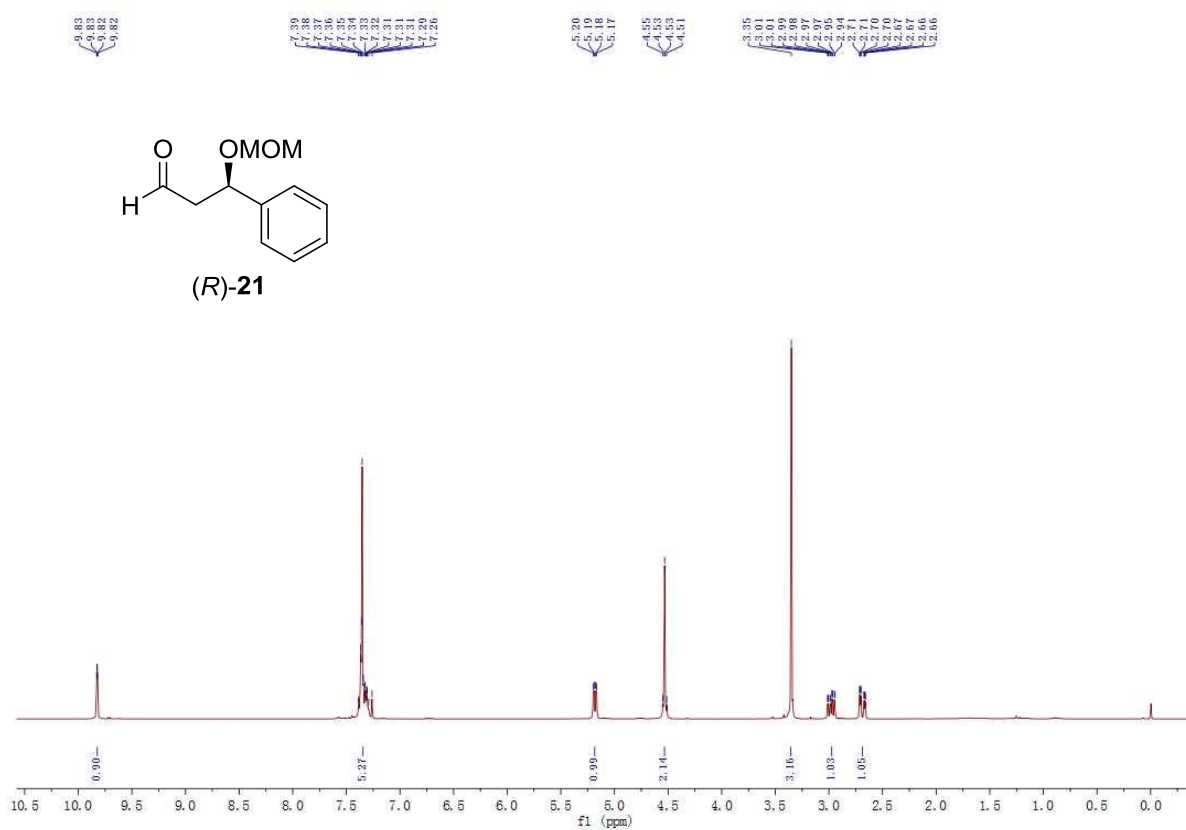

**$^{13}\text{C}$  NMR spectrum of compound (R)-21 (100 MHz,  $\text{CDCl}_3$ )**

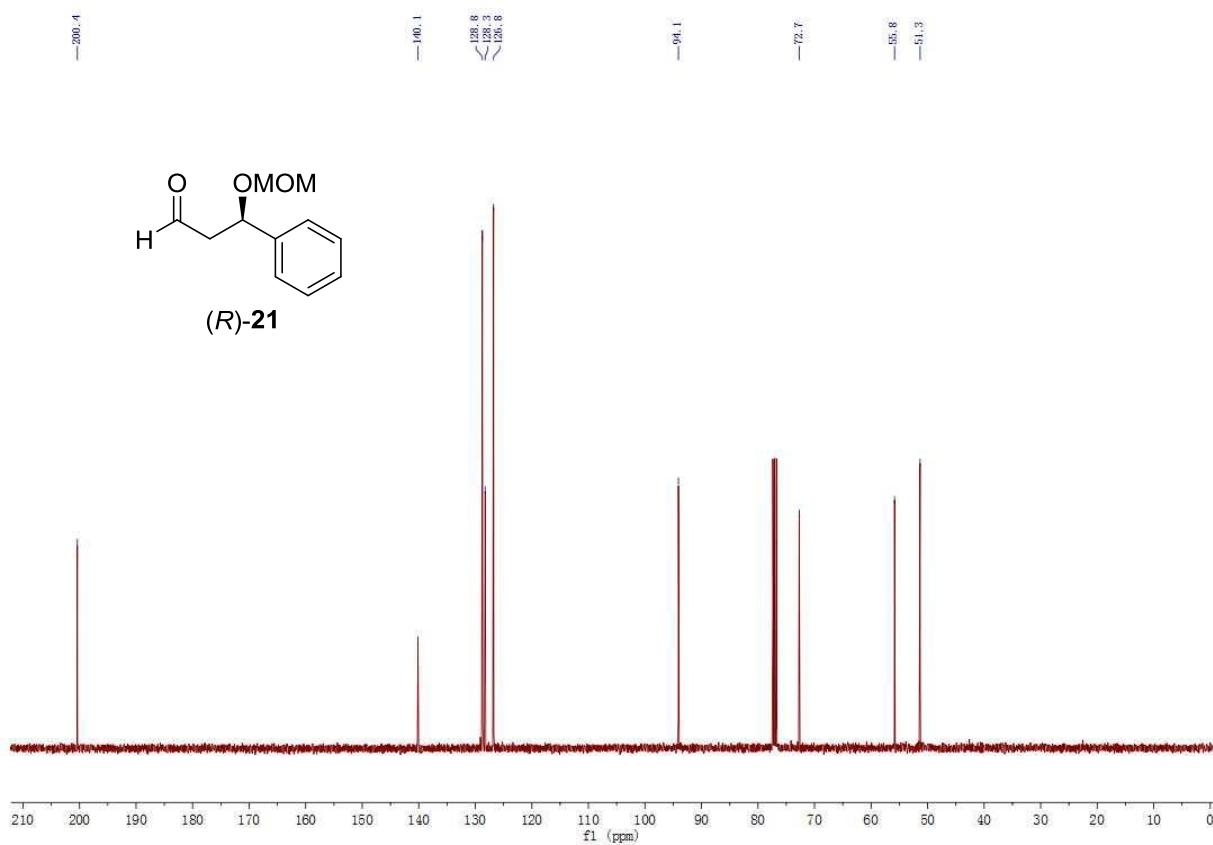

**<sup>1</sup>H NMR spectrum of compound 26 (more polar isomer) (400 MHz, CDCl<sub>3</sub>)**

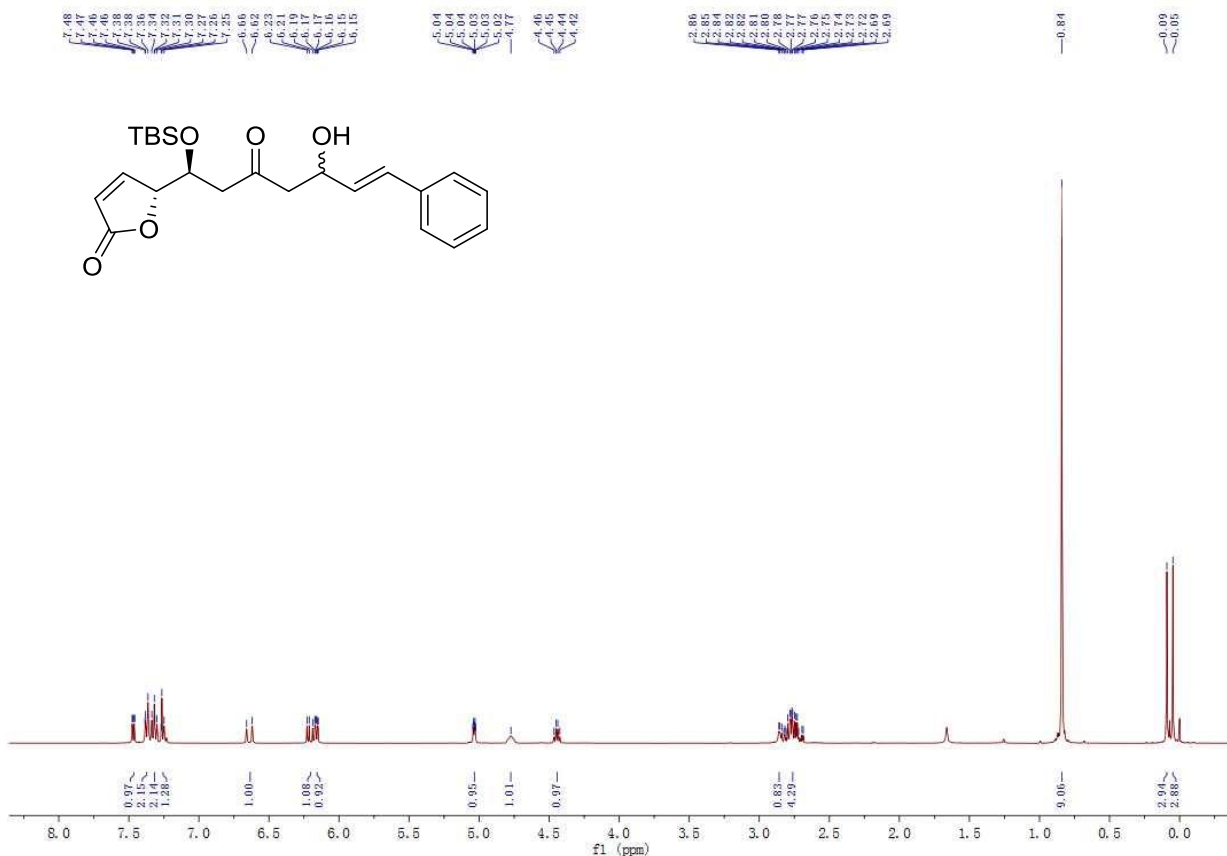

**<sup>13</sup>C NMR spectrum of compound 26 (more polar isomer) (100 MHz, CDCl<sub>3</sub>)**

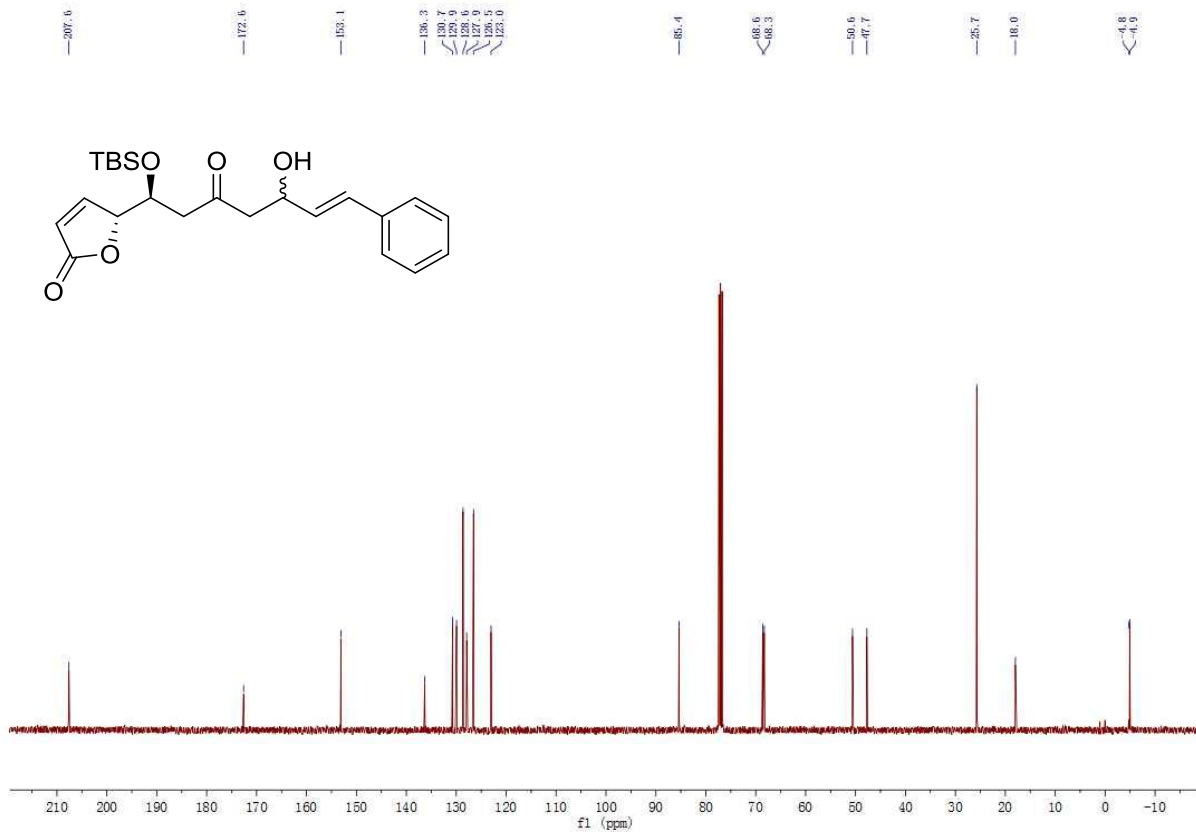

**<sup>1</sup>H NMR spectrum of compound 27 (less polar isomer) (400 MHz, CDCl<sub>3</sub>)**

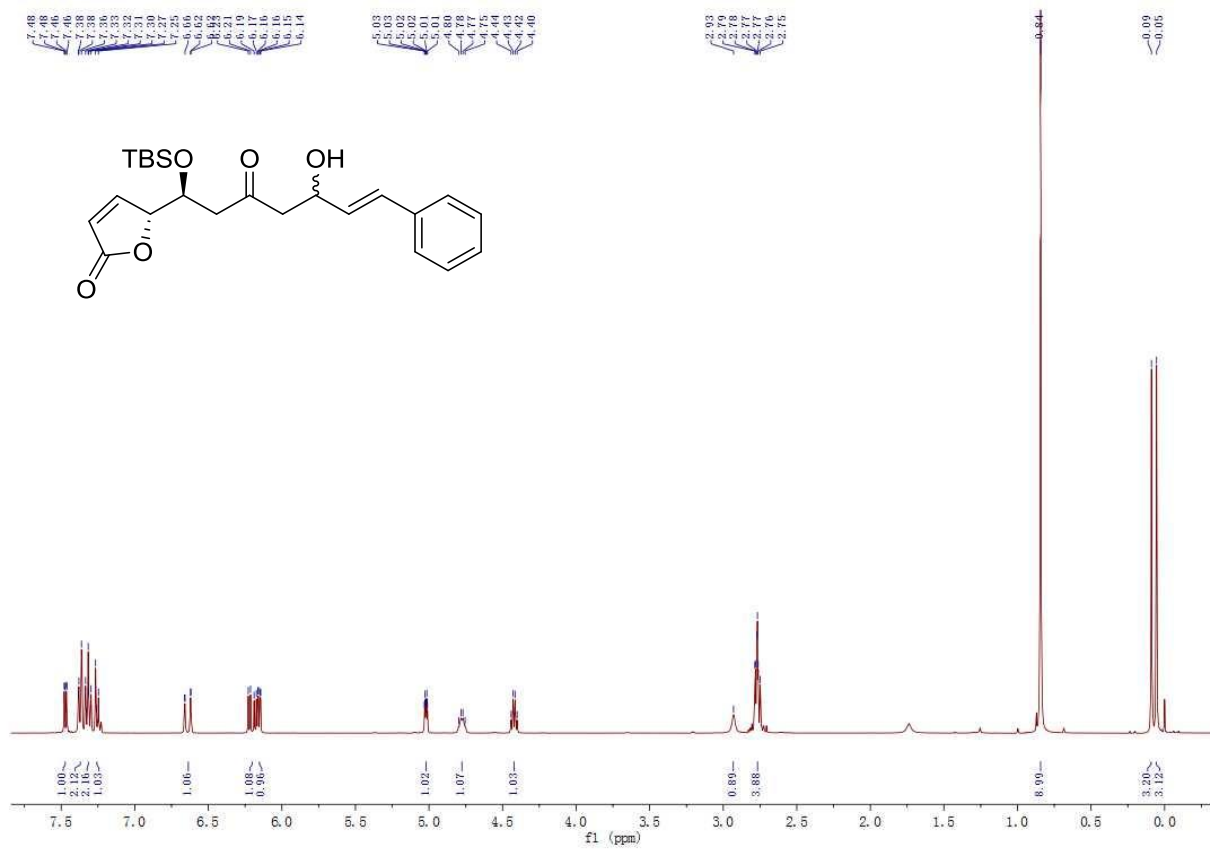

**<sup>13</sup>C NMR spectrum of compound 27 (less polar isomer) (100 MHz, CDCl<sub>3</sub>)**

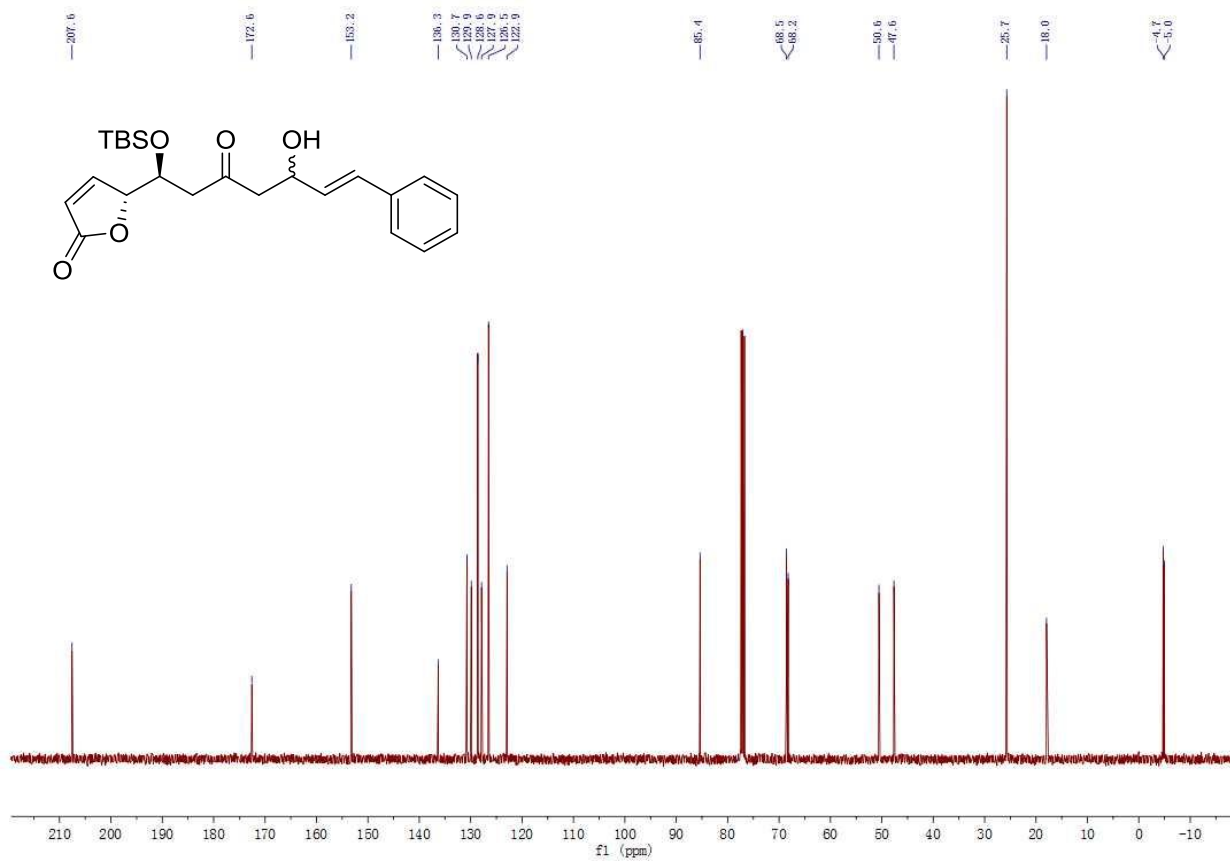



**$^1\text{H}$  NMR spectrum of compound 28 (400 MHz,  $\text{CDCl}_3$ )**

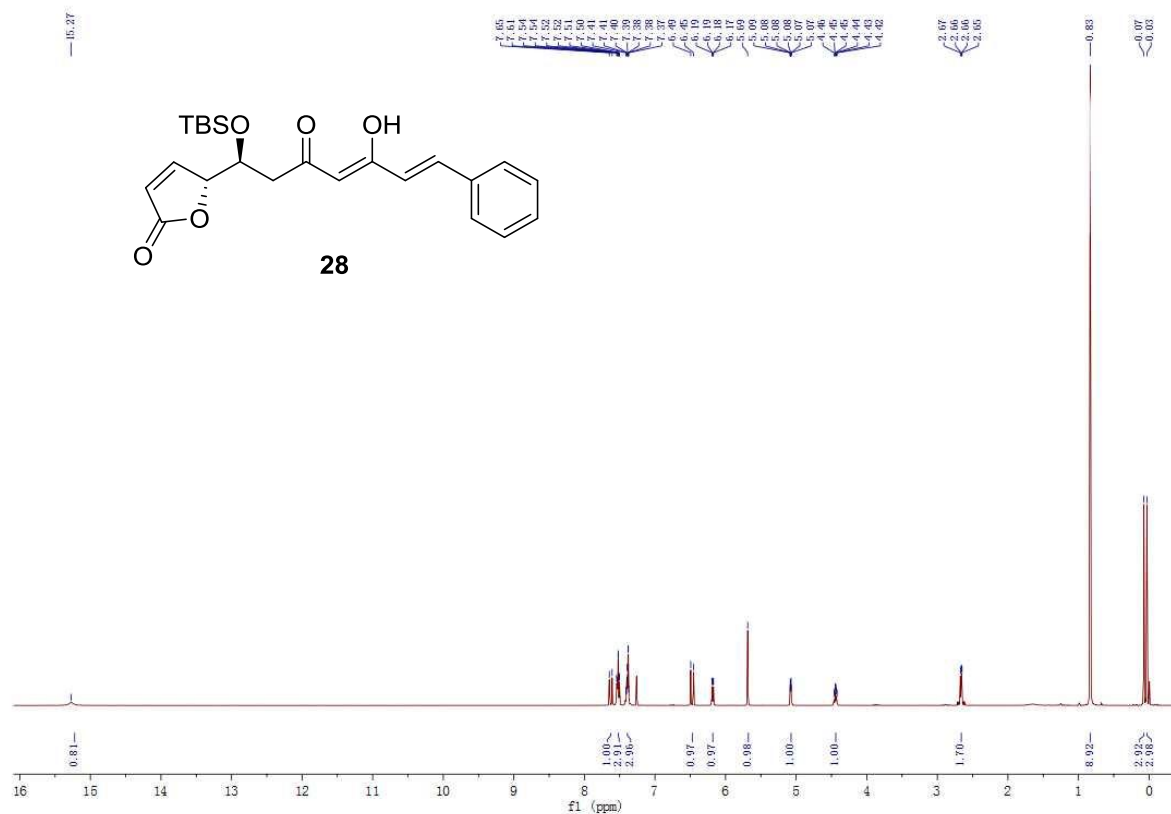

**$^{13}\text{C}$  NMR spectrum of compound 28 (100 MHz,  $\text{CDCl}_3$ )**

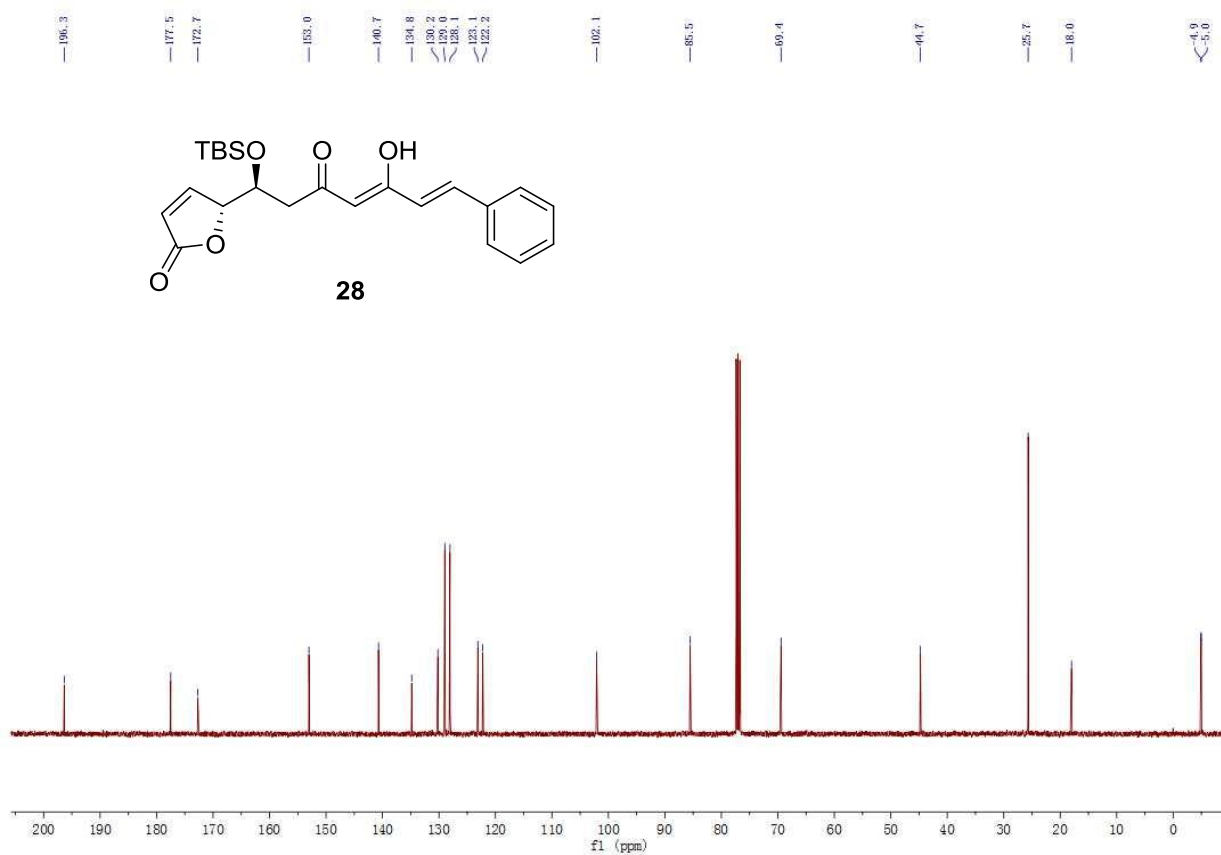

**$^1\text{H}$  NMR spectrum of compound 29 (400 MHz,  $\text{CDCl}_3$ )**

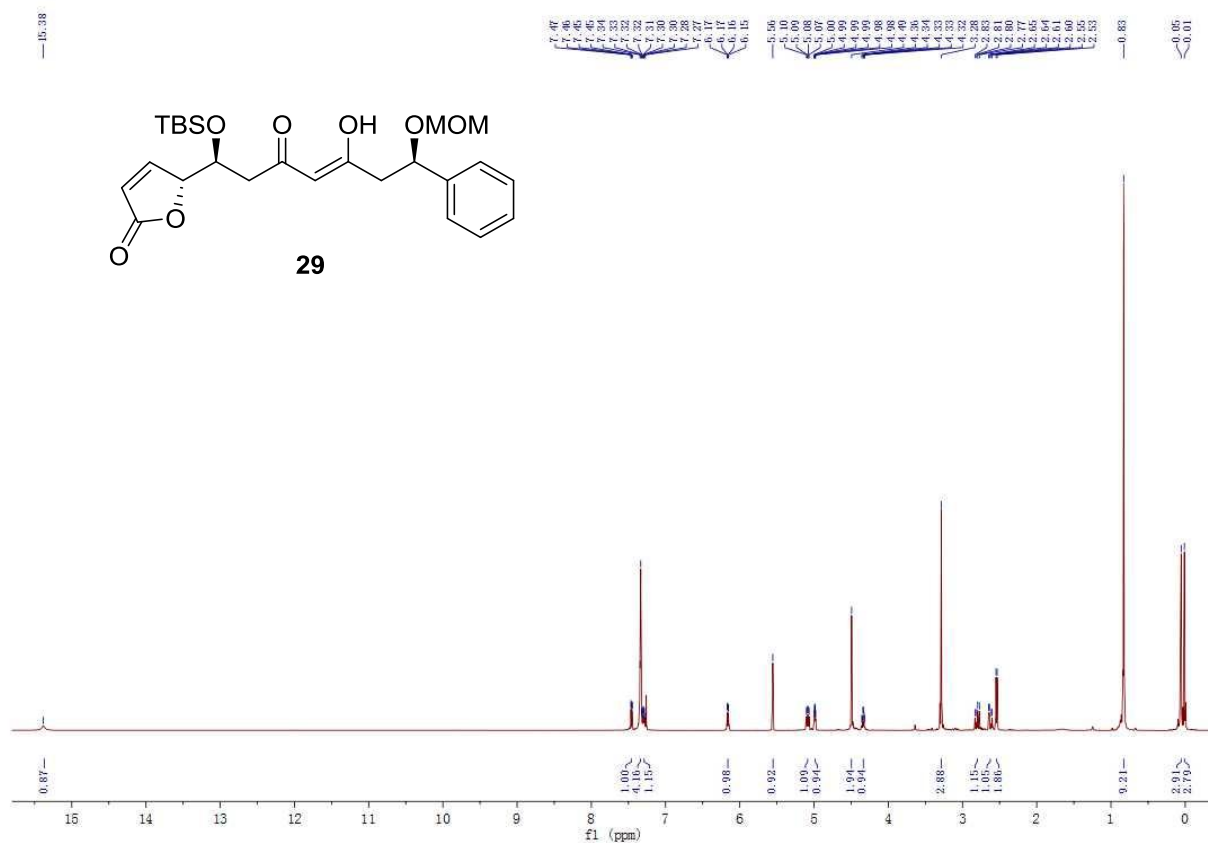

**$^{13}\text{C}$  NMR spectrum of compound 29 (100 MHz,  $\text{CDCl}_3$ )**

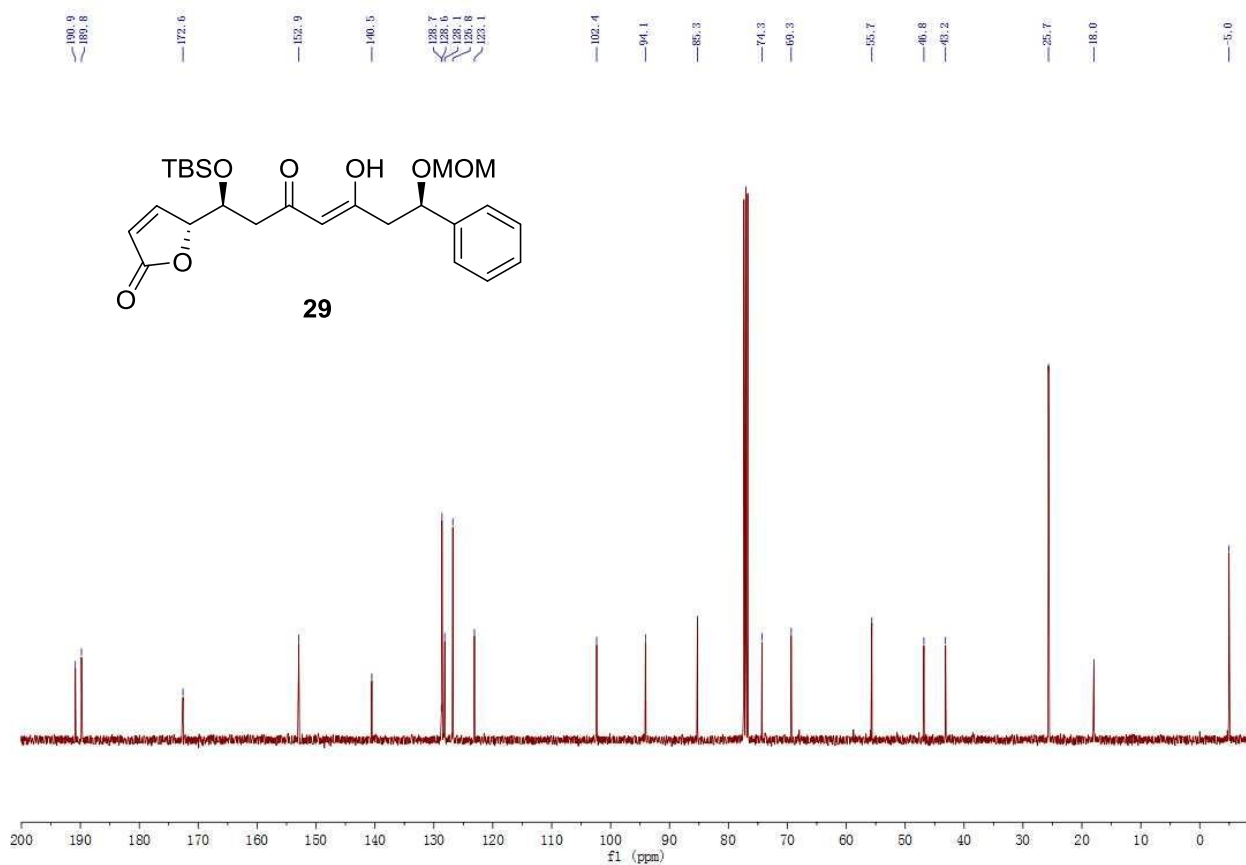

**$^1\text{H}$  NMR spectrum of compound 30 (400 MHz,  $\text{CDCl}_3$ )**

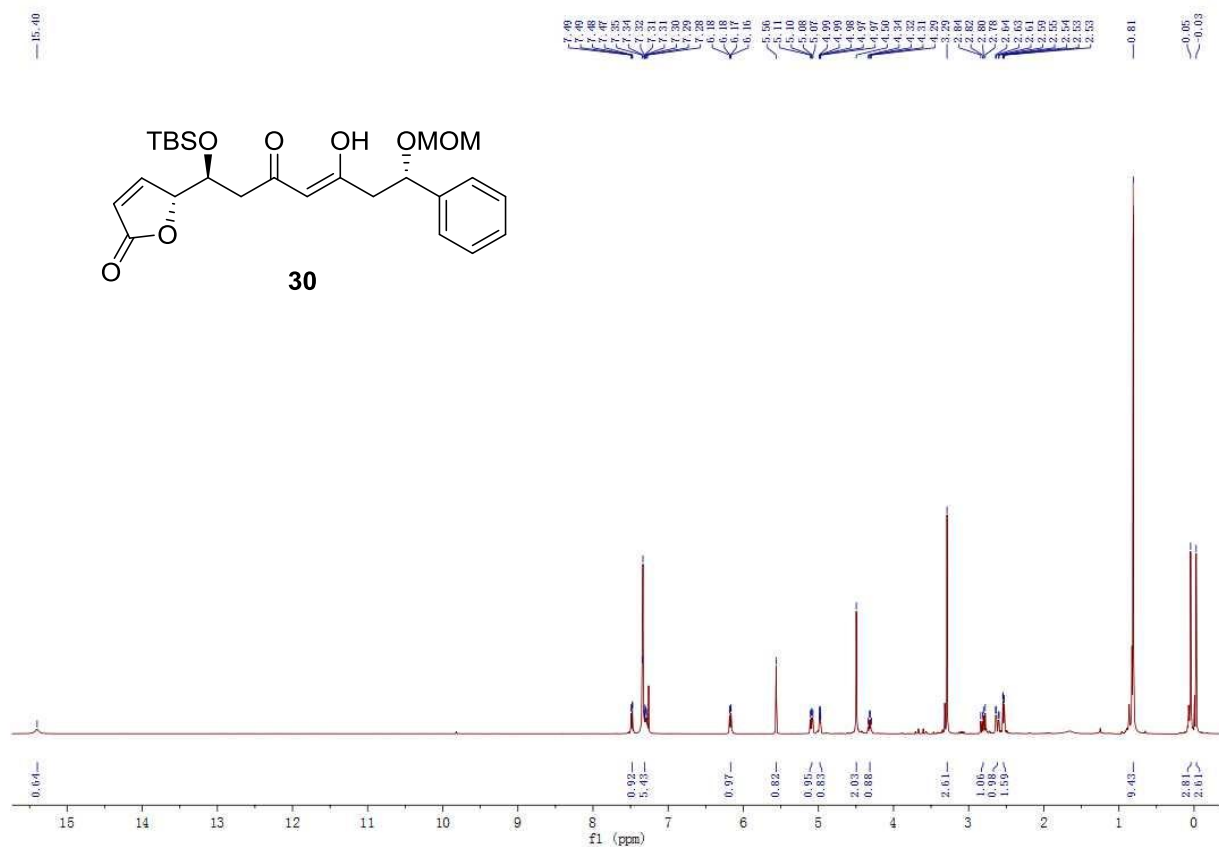

**$^{13}\text{C}$  NMR spectrum of compound 30 (100 MHz,  $\text{CDCl}_3$ )**

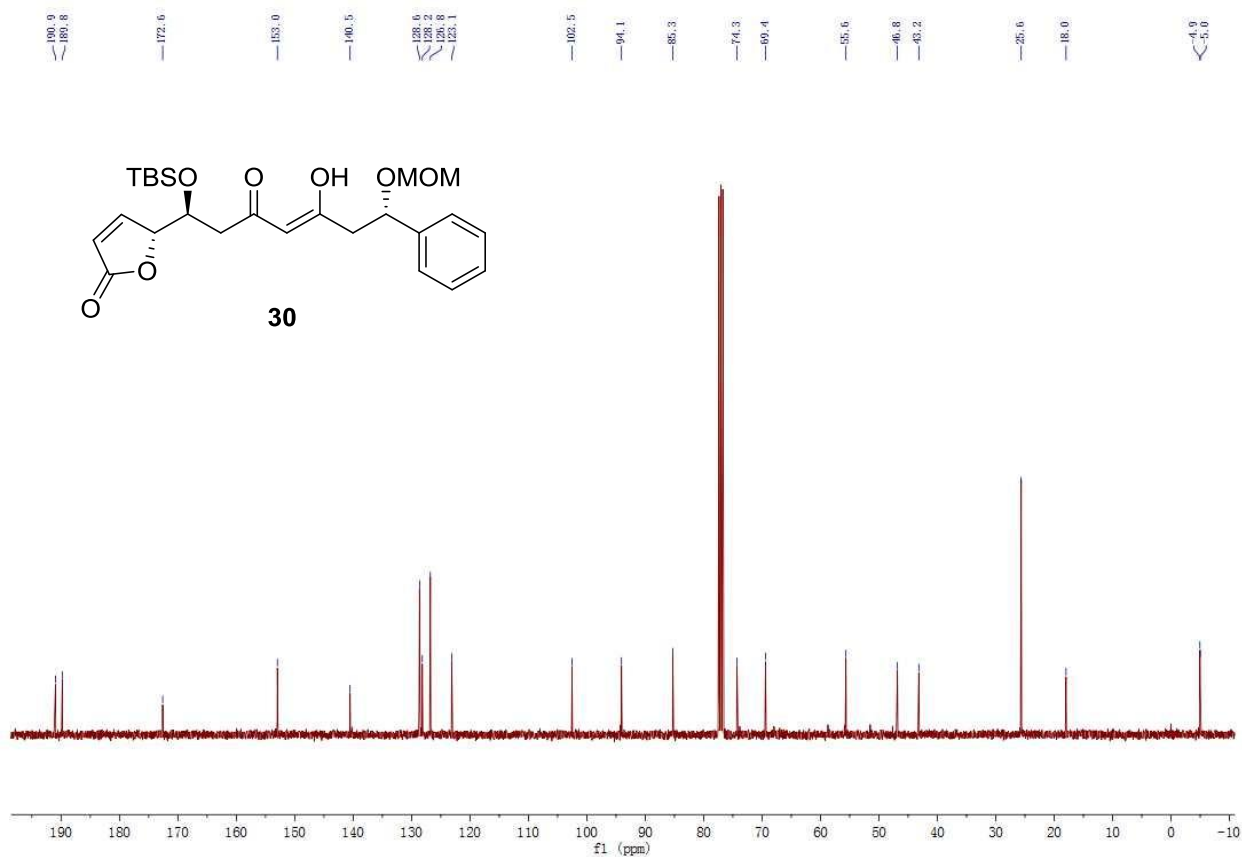

**<sup>1</sup>H NMR spectrum of compound 31 (400 MHz, CDCl<sub>3</sub>)**

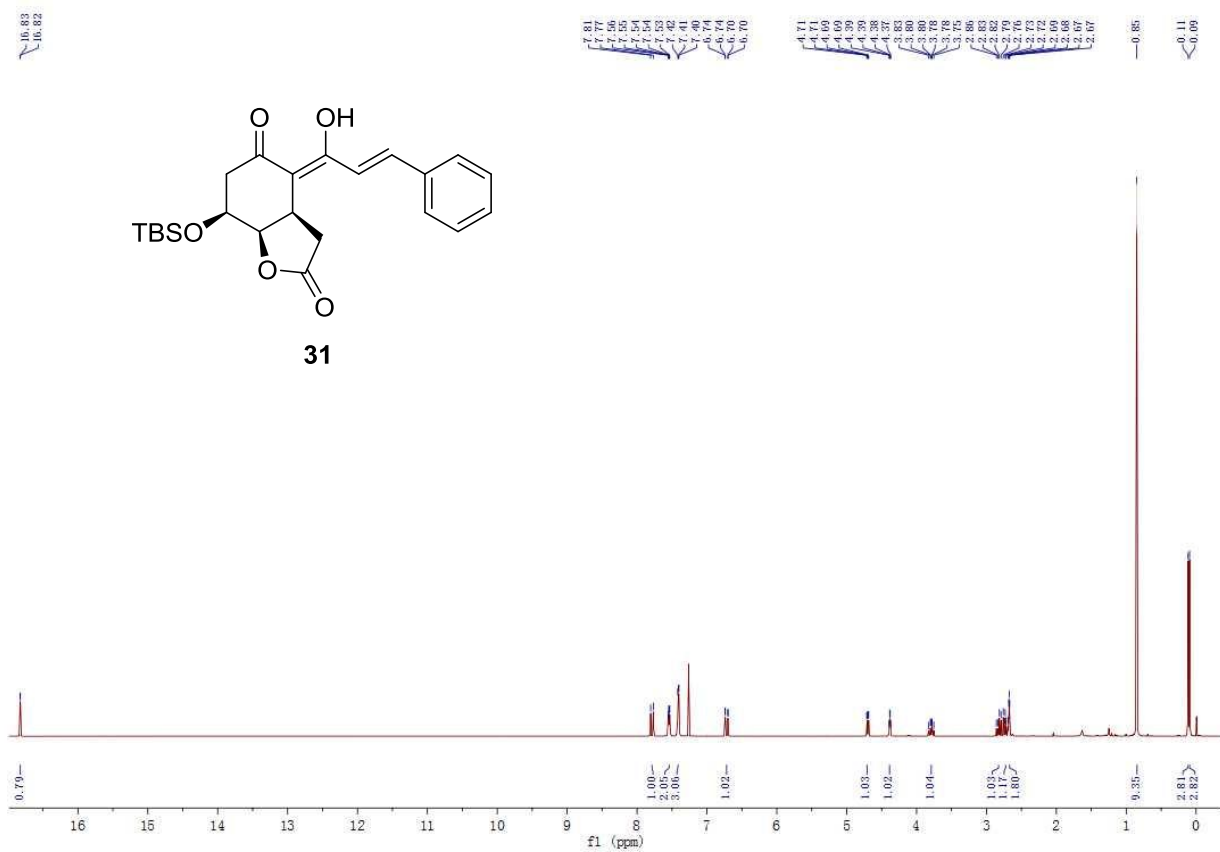

**$^{13}\text{C}$  NMR spectrum of compound 31 (100 MHz,  $\text{CDCl}_3$ )**

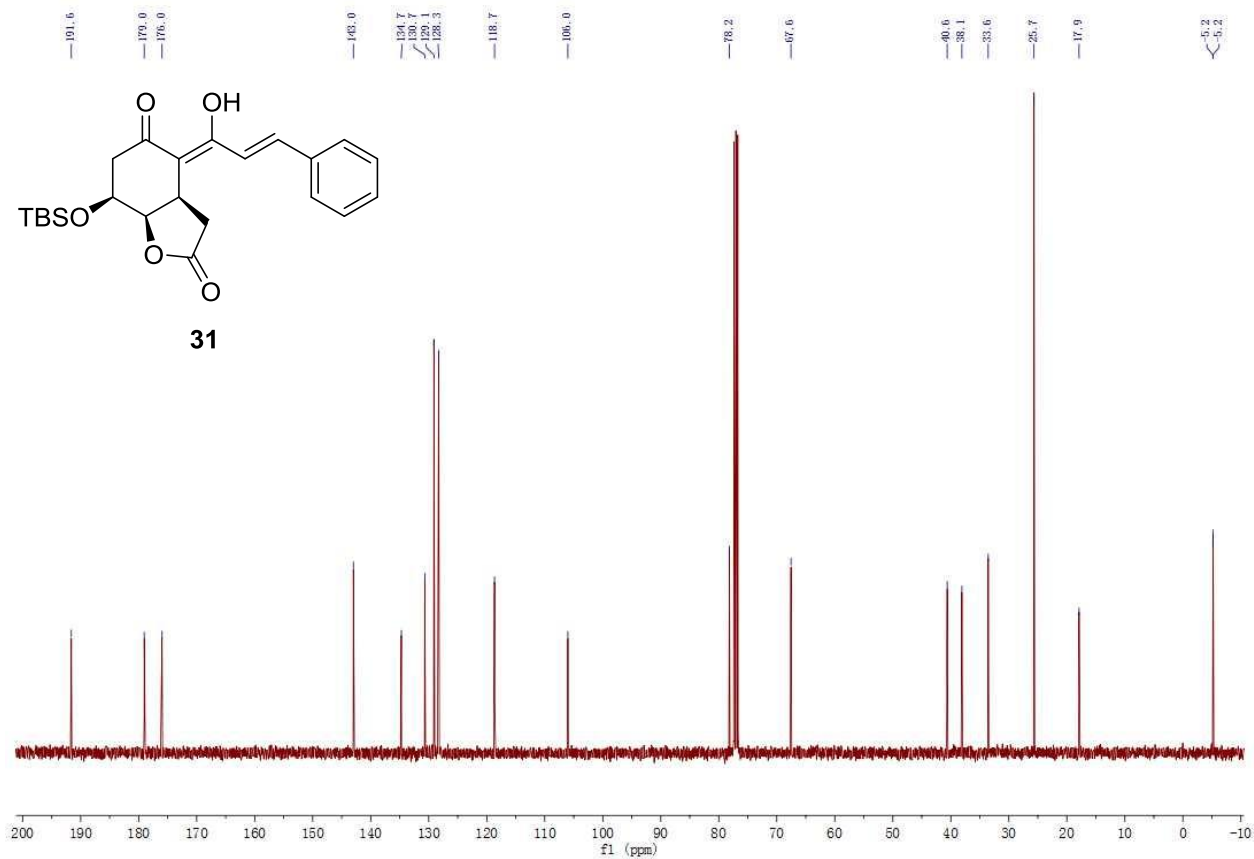

**<sup>1</sup>H NMR spectrum of compound 32 (400 MHz, CDCl<sub>3</sub>)**

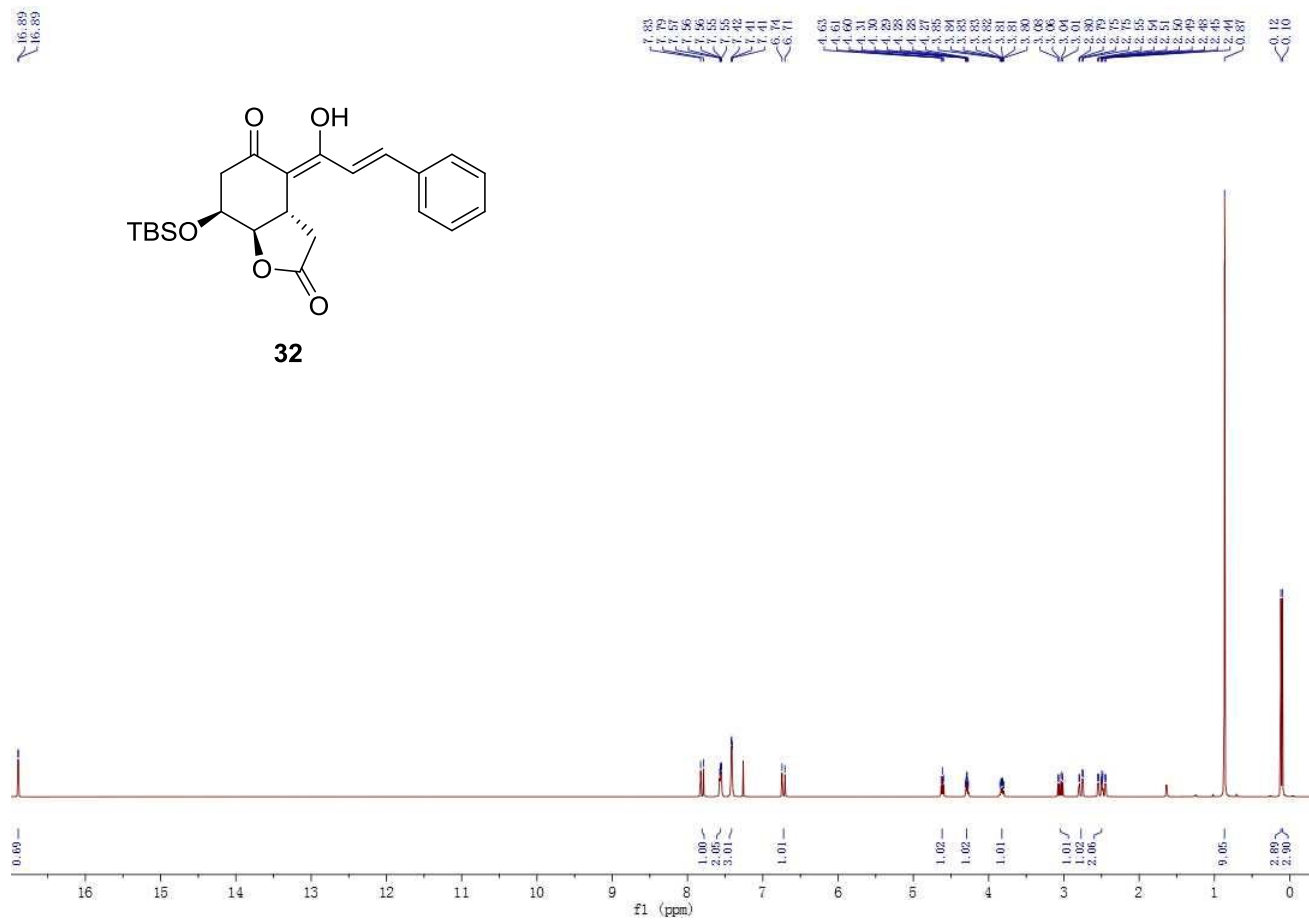

**$^{13}\text{C}$  NMR spectrum of compound 32 (100 MHz,  $\text{CDCl}_3$ )**

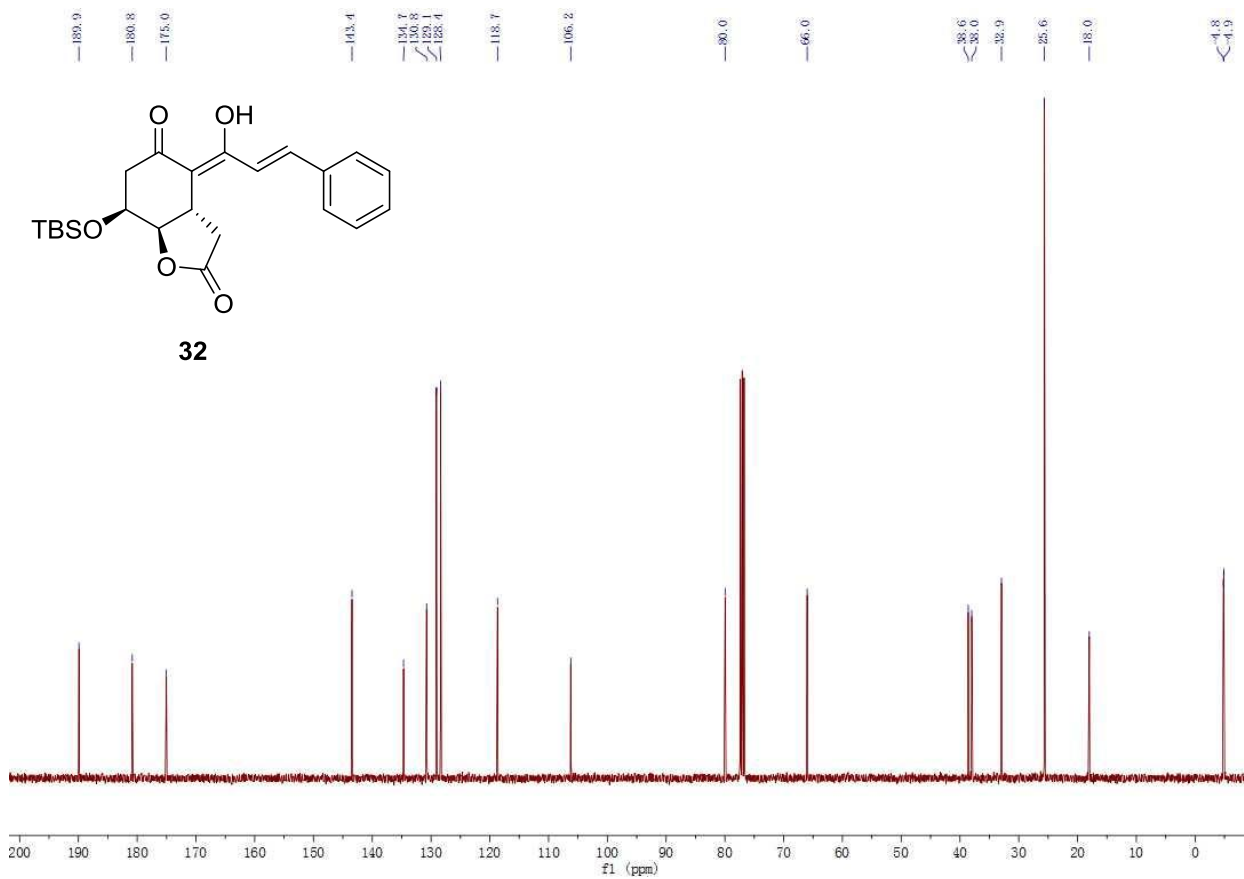

**$^1\text{H}$  NMR spectrum of compound 5 (400 MHz,  $\text{CDCl}_3\text{-CD}_3\text{OD}$ )**

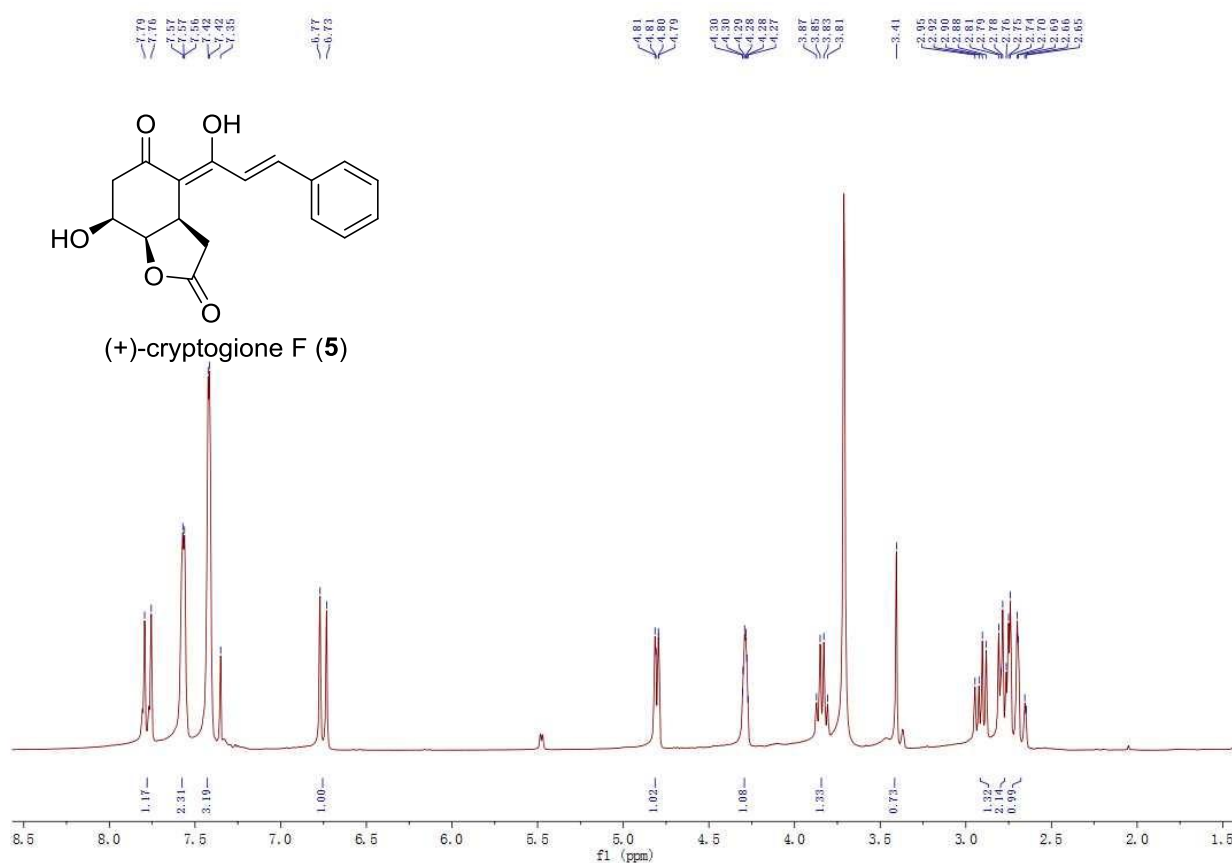

**$^{13}\text{C}$  NMR spectrum of compound 5 (100 MHz,  $\text{CDCl}_3\text{-CD}_3\text{OD}$ )**

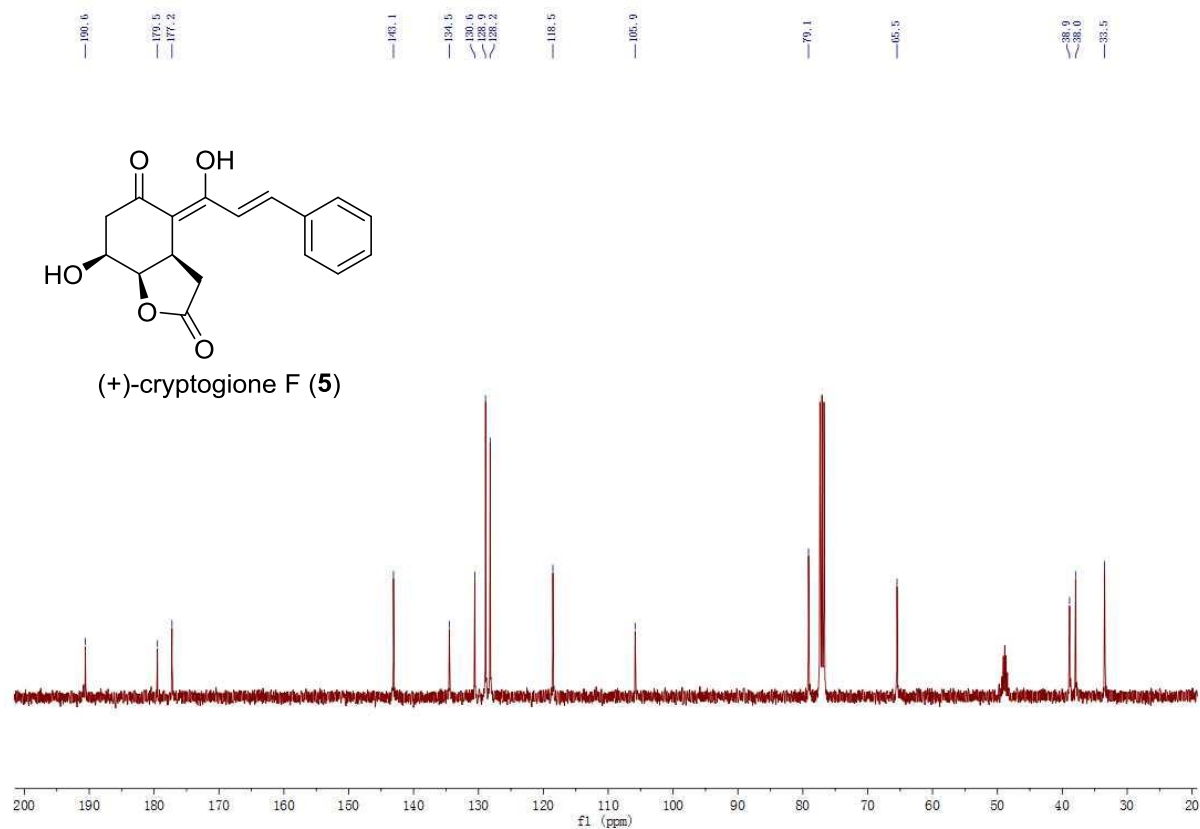

**$^1\text{H}$  NMR spectrum of compound 2 (400 MHz,  $\text{CDCl}_3$ )**

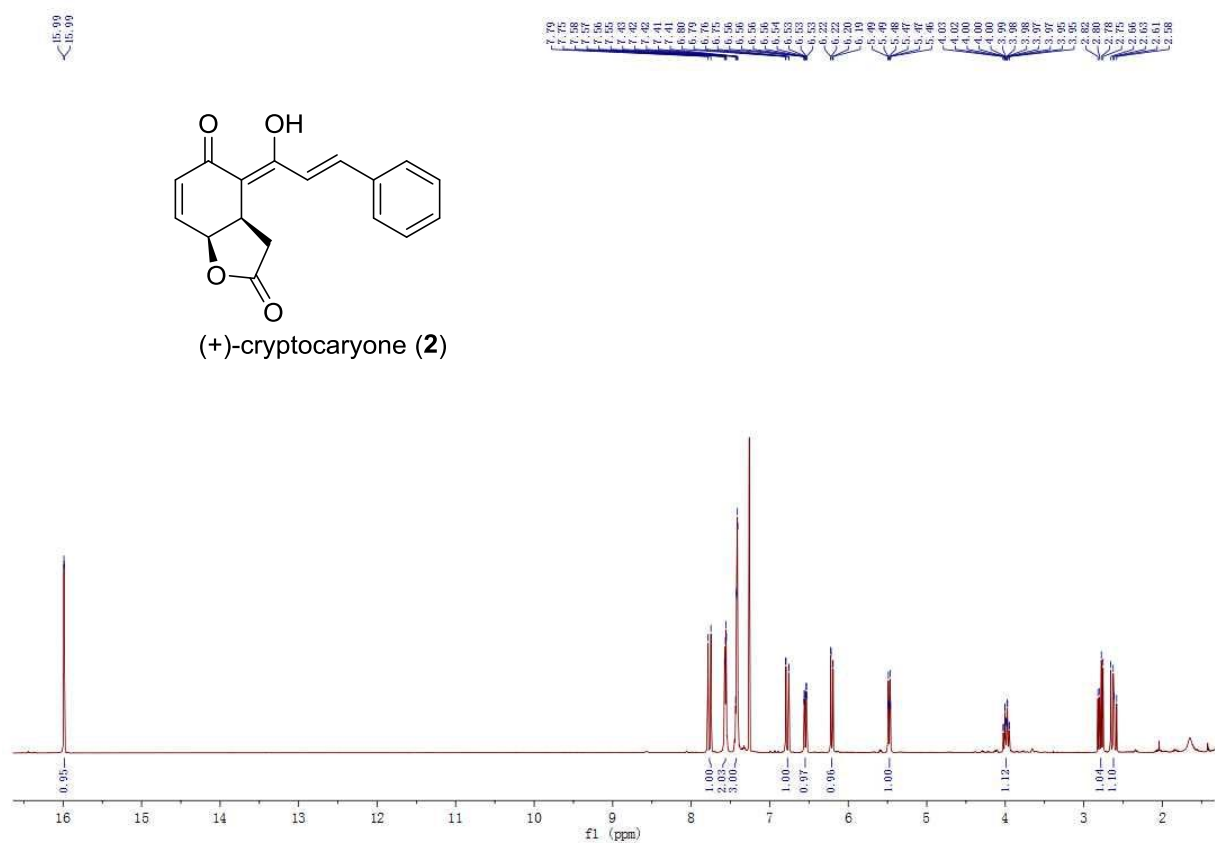

**<sup>1</sup>H NMR spectrum of compound 33 (400 MHz, CDCl<sub>3</sub>)**

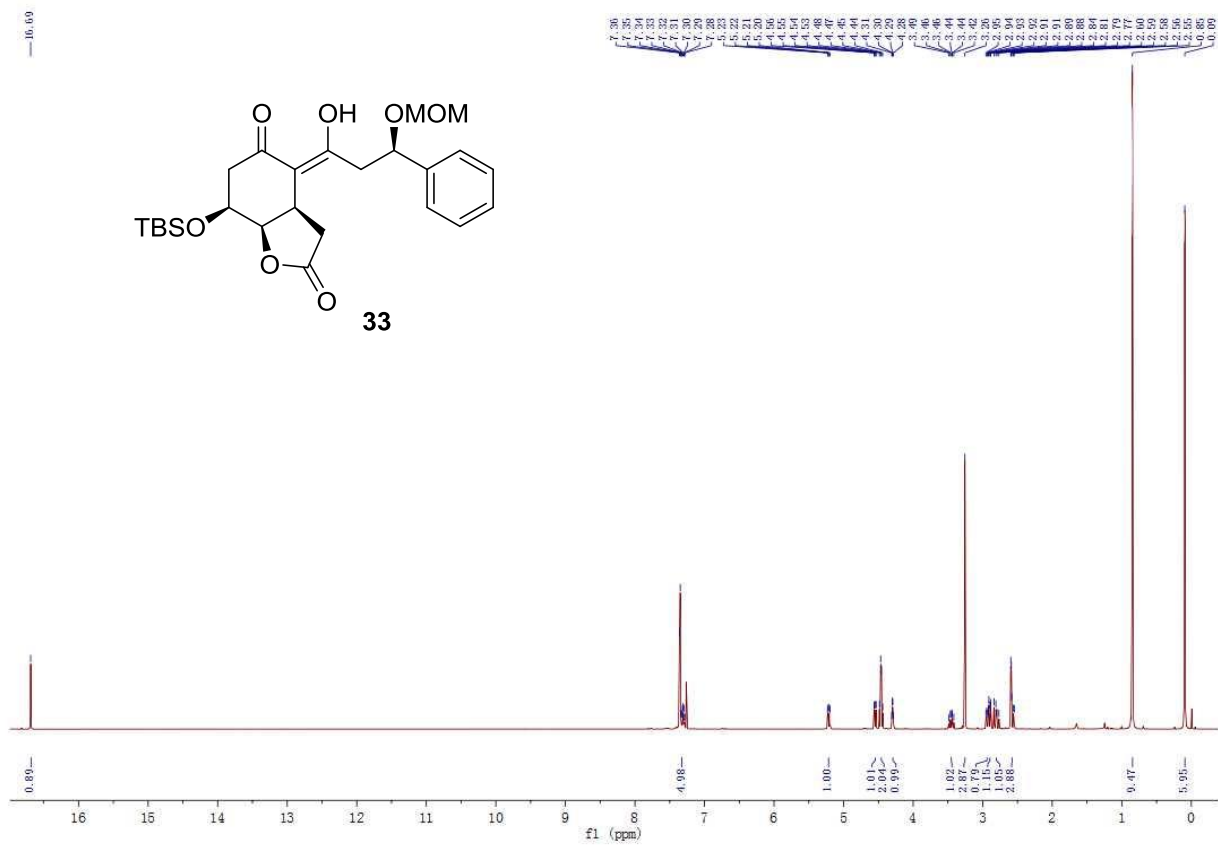

**<sup>13</sup>C NMR spectrum of compound 33 (100 MHz, CDCl<sub>3</sub>)**

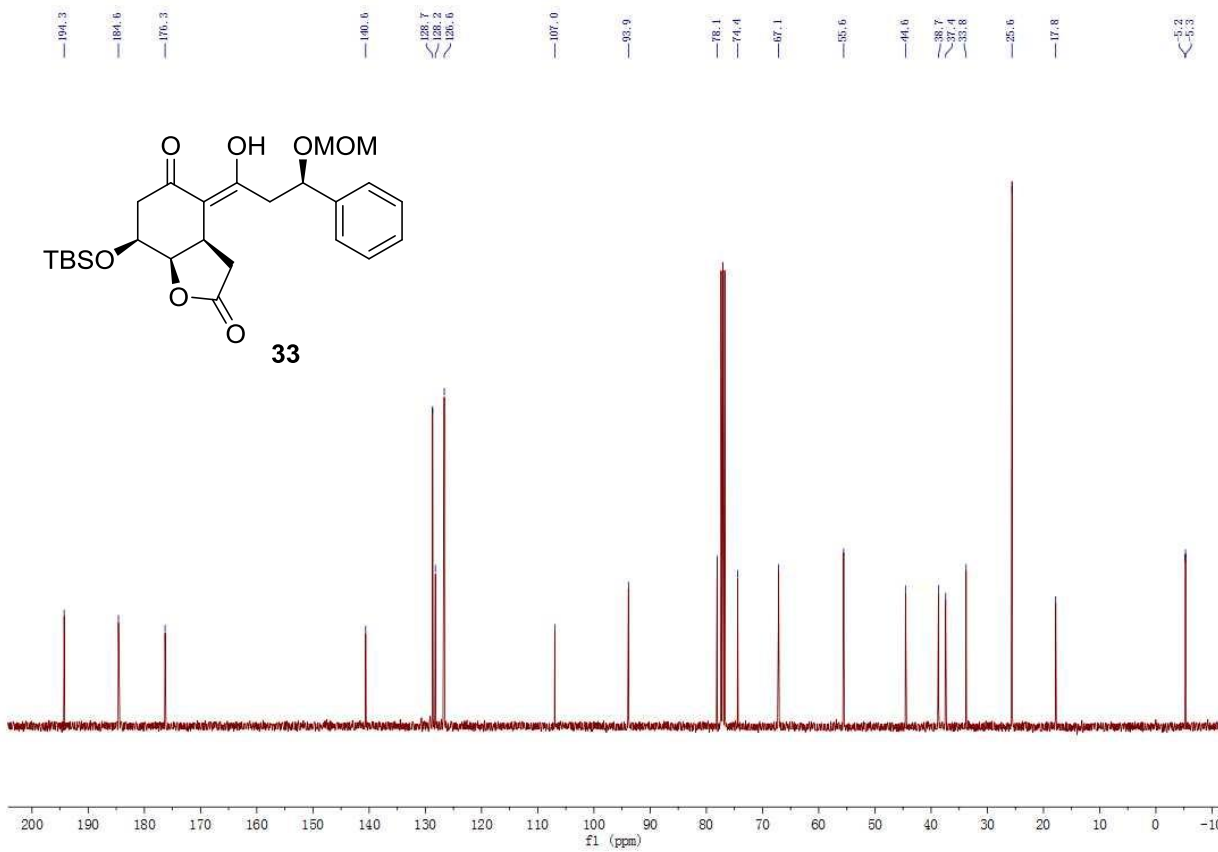



**<sup>1</sup>H NMR spectrum of compound 37 (400 MHz, CDCl<sub>3</sub>)**

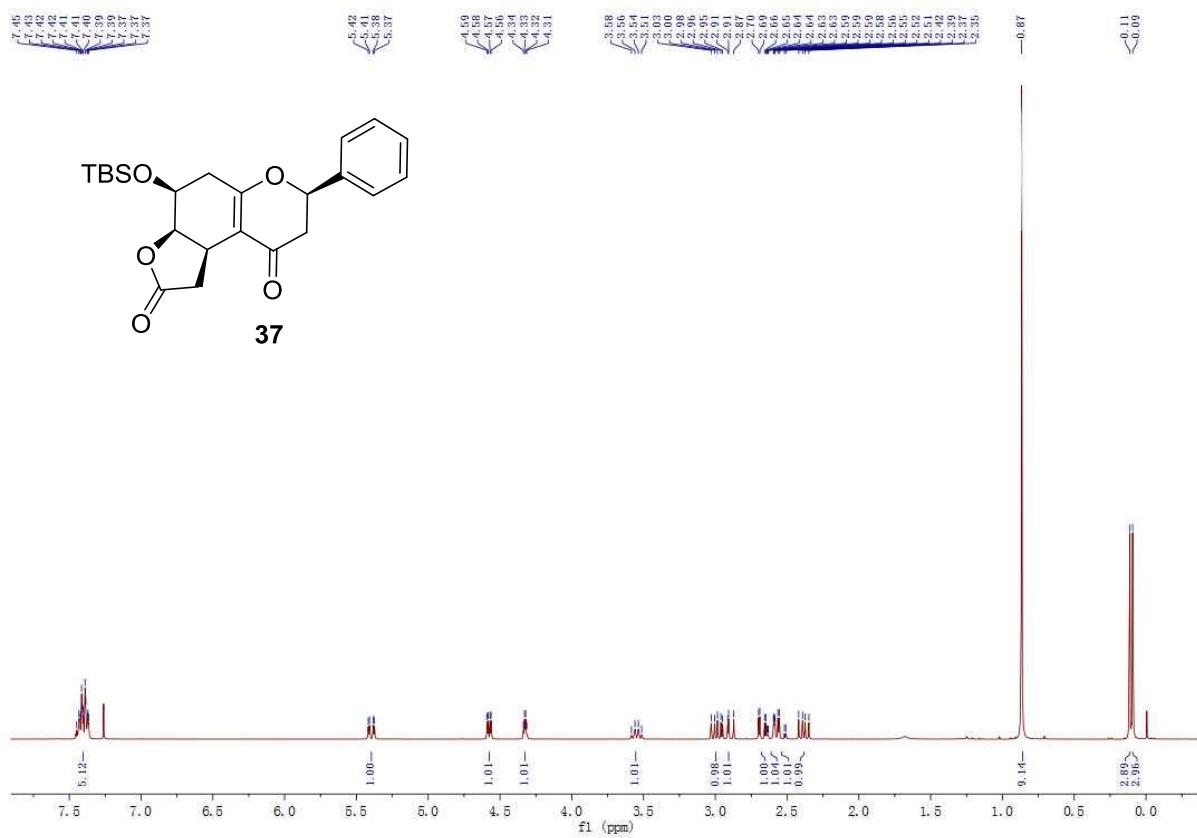

**$^{13}\text{C}$  NMR spectrum of compound 37 (100 MHz,  $\text{CDCl}_3$ )**

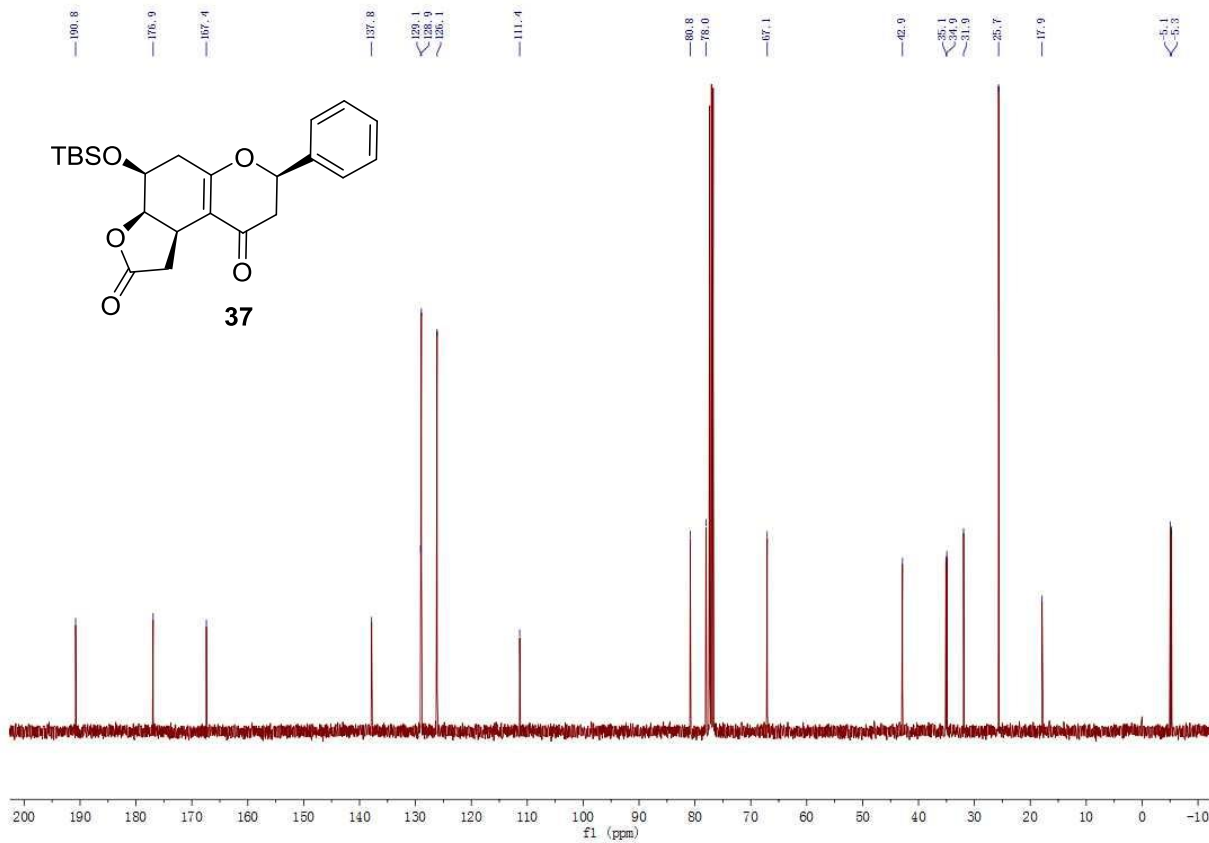

**$^1\text{H}$  NMR spectrum of compound 38 (400 MHz,  $\text{CDCl}_3$ )**

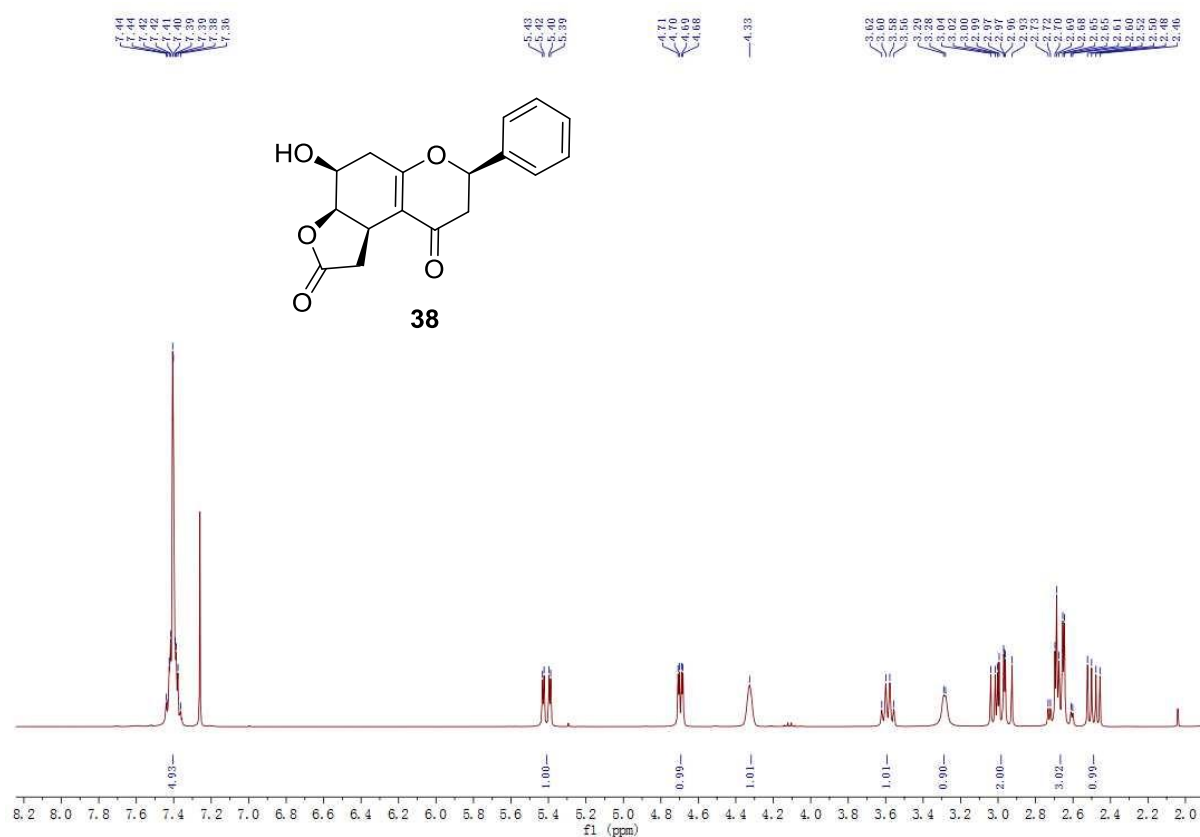

**$^{13}\text{C}$  NMR spectrum of compound 38 (100 MHz,  $\text{CDCl}_3$ )**

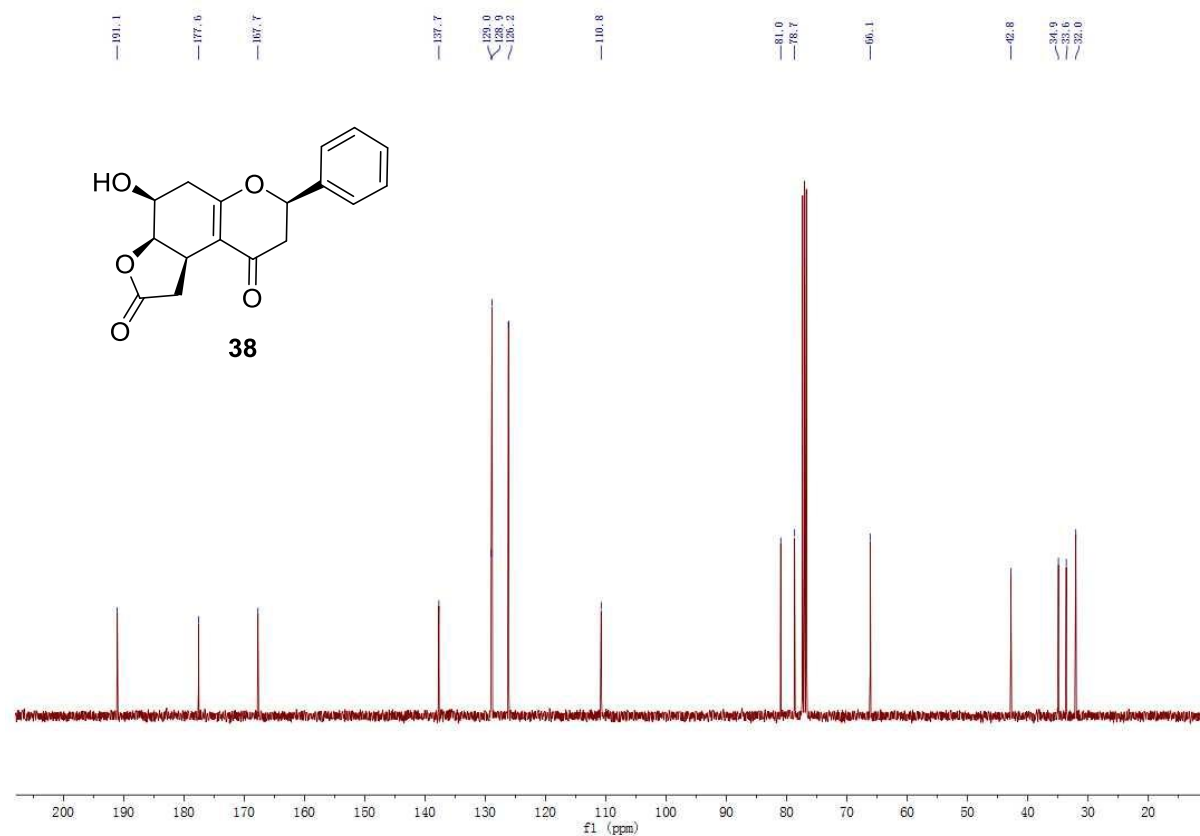

**$^1\text{H}$  NMR spectrum of compound 3 (400 MHz,  $\text{CDCl}_3$ )**

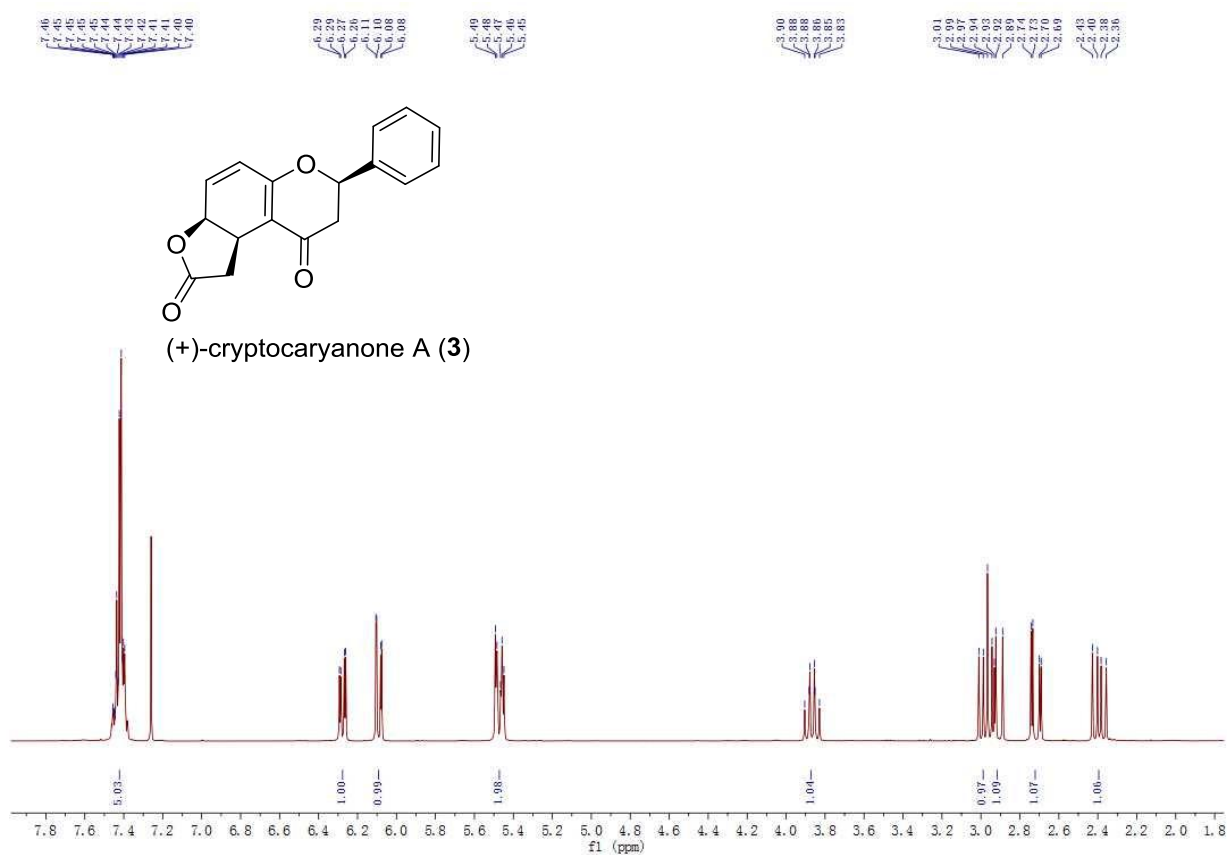

**$^{13}\text{C}$  NMR spectrum of compound 3 (100 MHz,  $\text{CDCl}_3$ )**

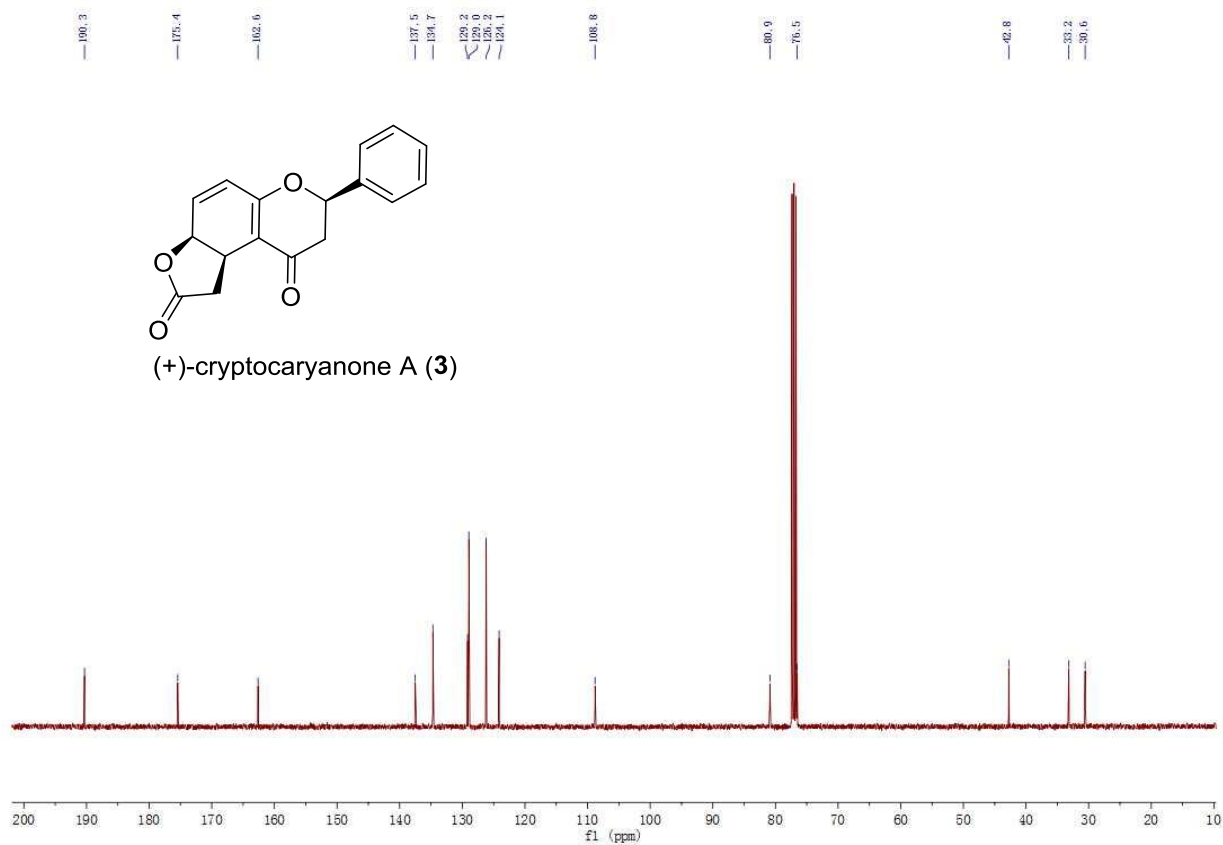

**<sup>1</sup>H NMR spectrum of compound 35 (400 MHz, CDCl<sub>3</sub>)**

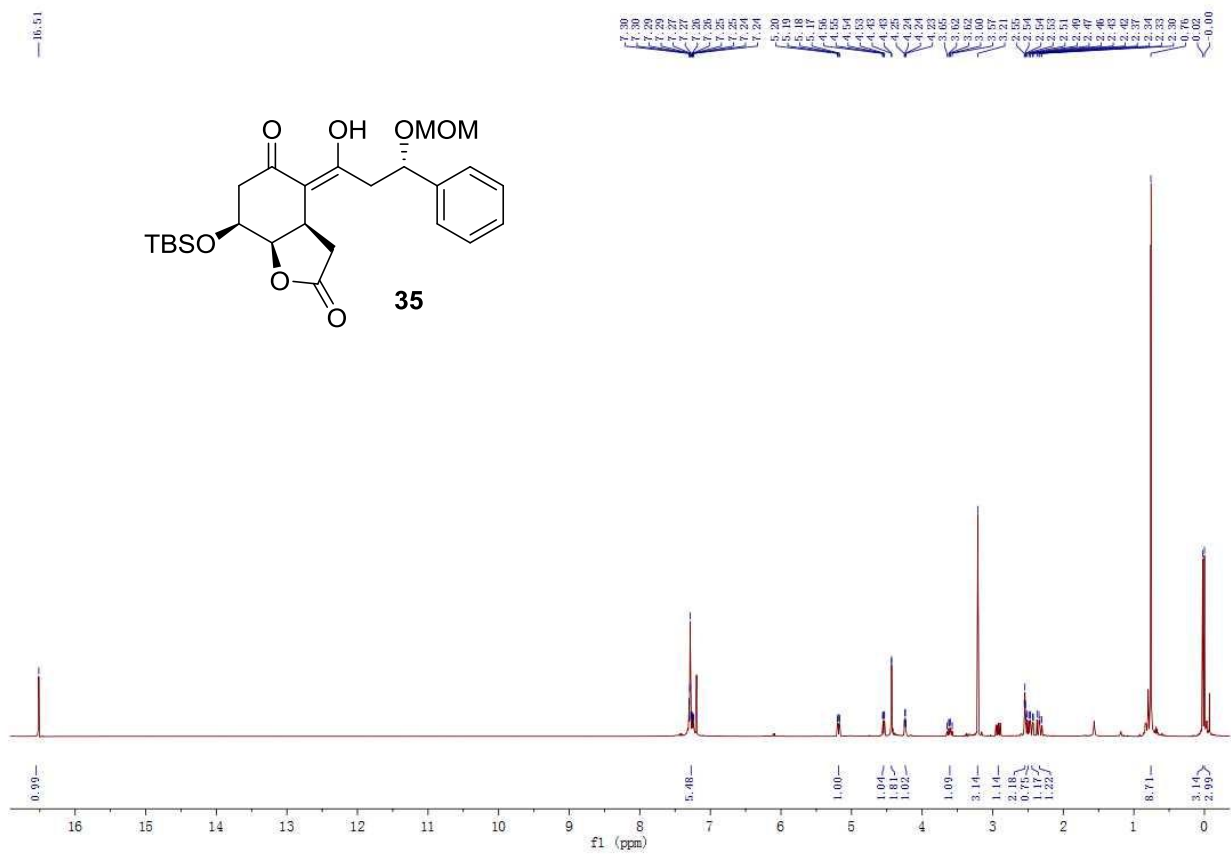

**$^{13}\text{C}$  NMR spectrum of compound 35 (100 MHz,  $\text{CDCl}_3$ )**

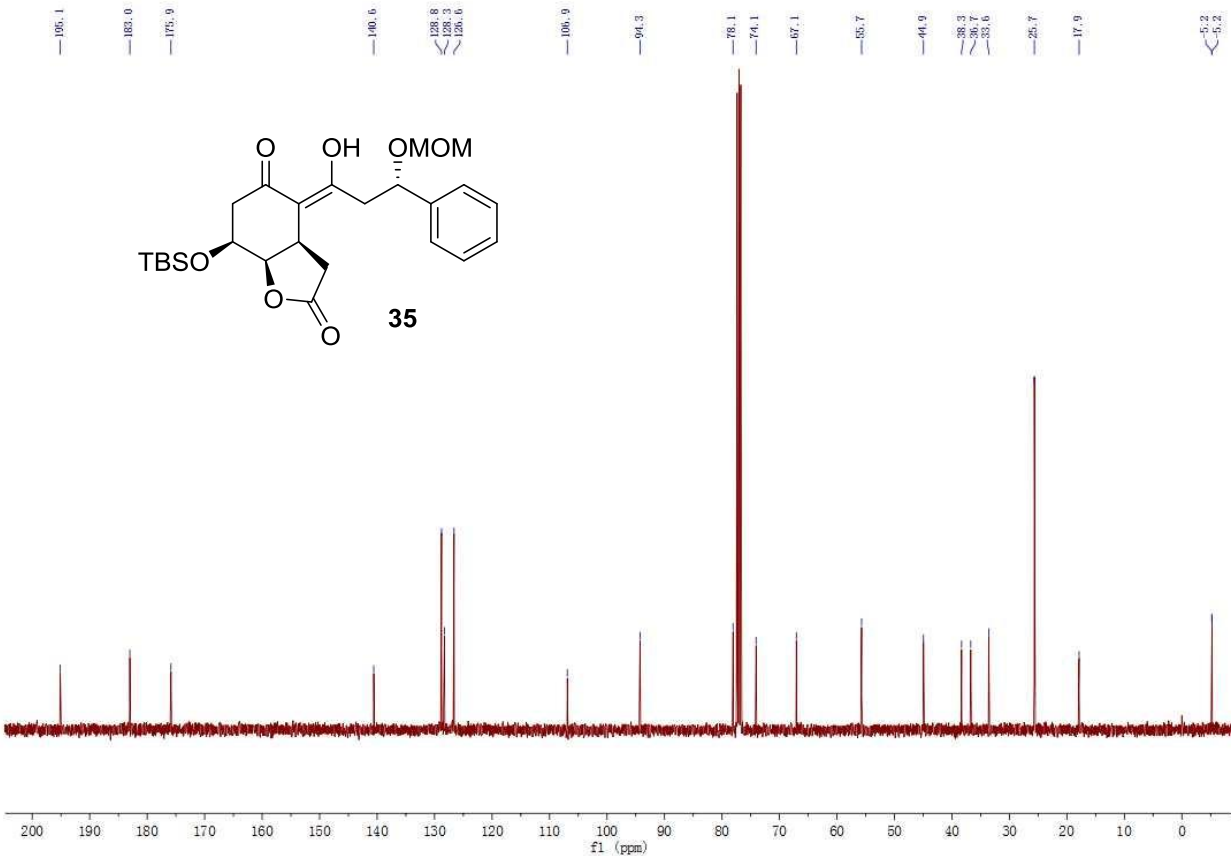

**<sup>1</sup>H NMR spectrum of compound 39 (400 MHz, CDCl<sub>3</sub>)**

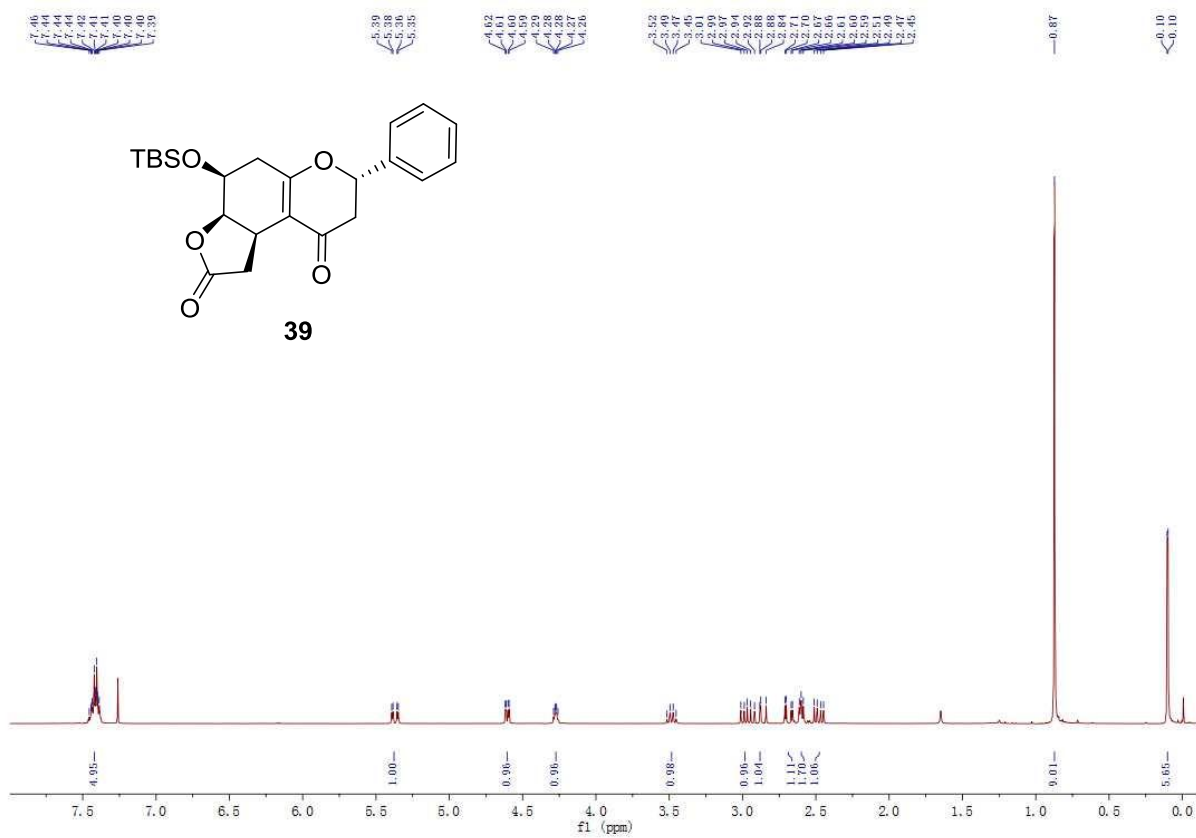

**$^{13}\text{C}$  NMR spectrum of compound 39 (100 MHz,  $\text{CDCl}_3$ )**

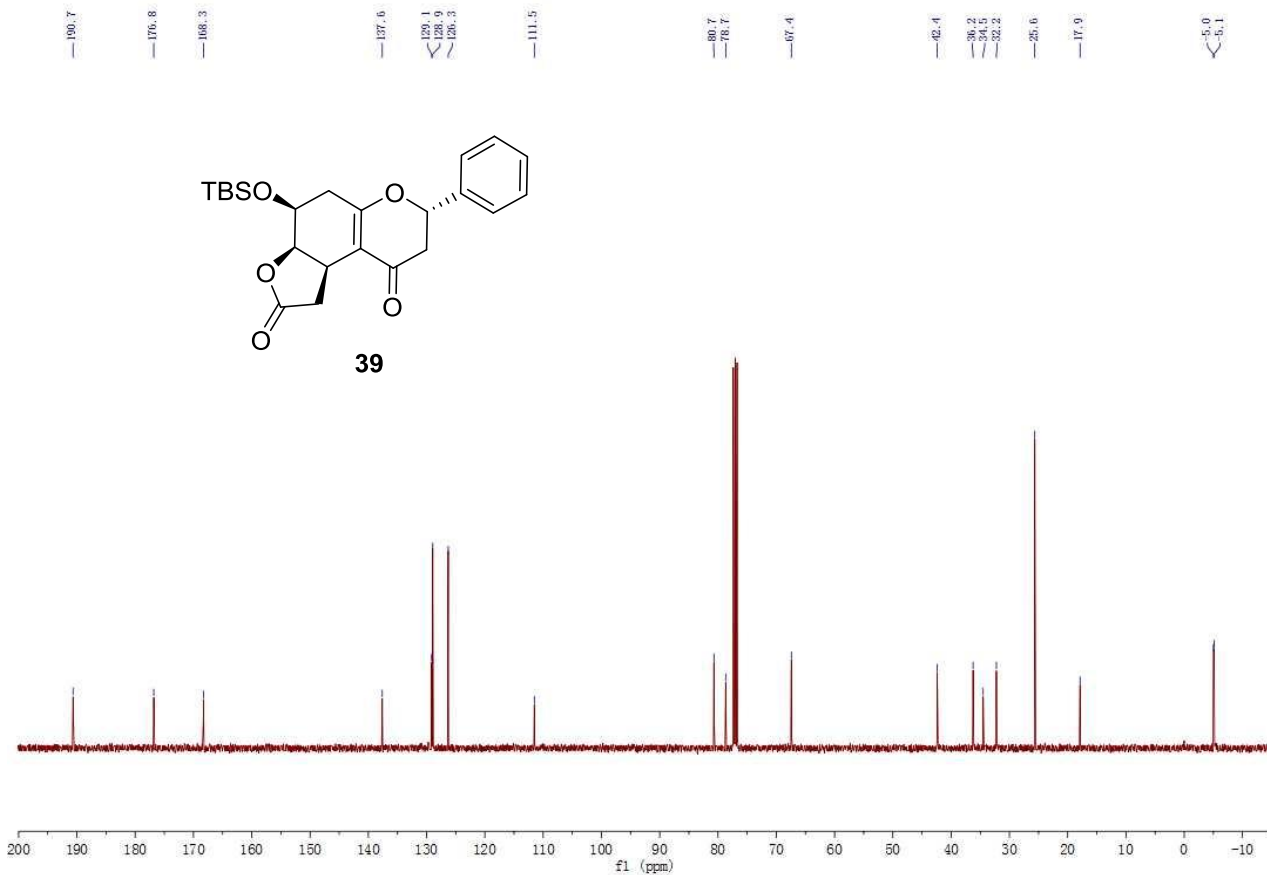

**$^1\text{H}$  NMR spectrum of compound 6 (400 MHz,  $\text{CDCl}_3$ )**

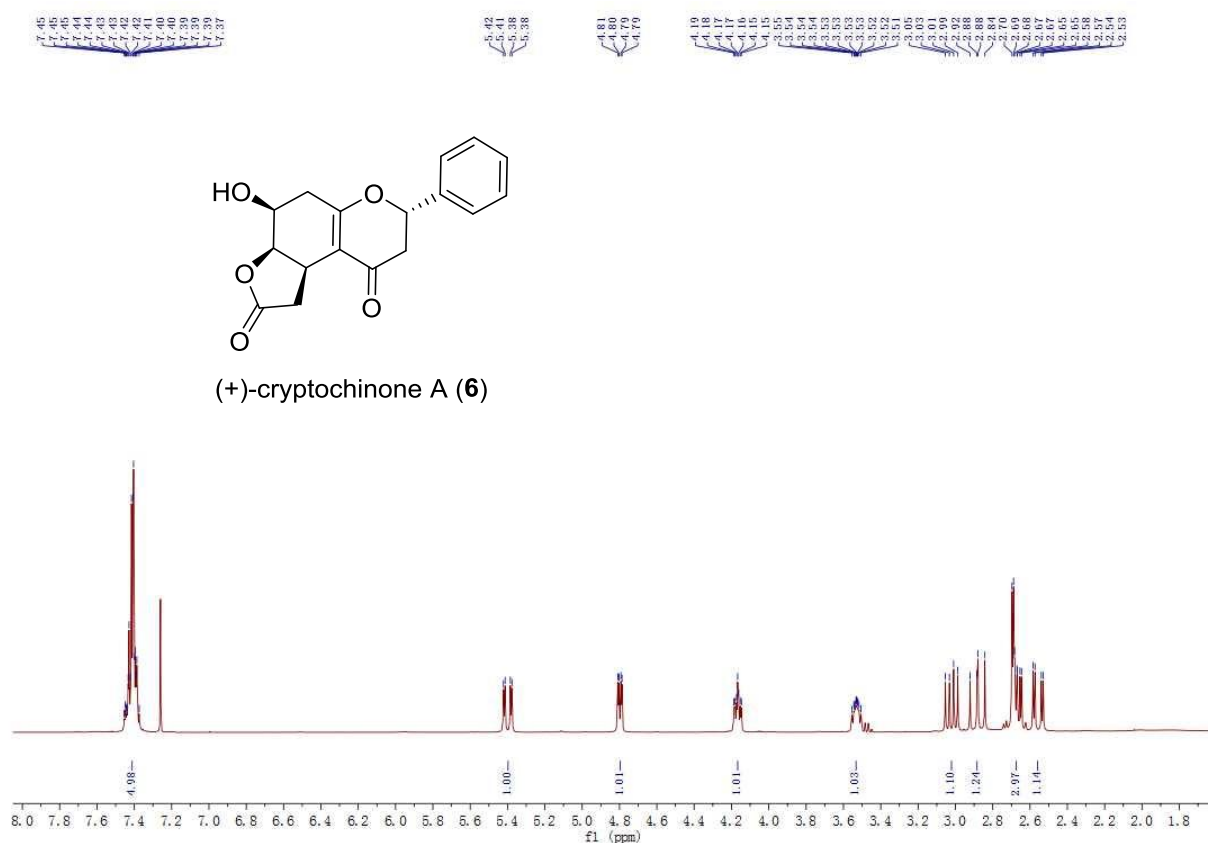

**$^{13}\text{C}$  NMR spectrum of compound 6 (100 MHz,  $\text{CDCl}_3$ )**

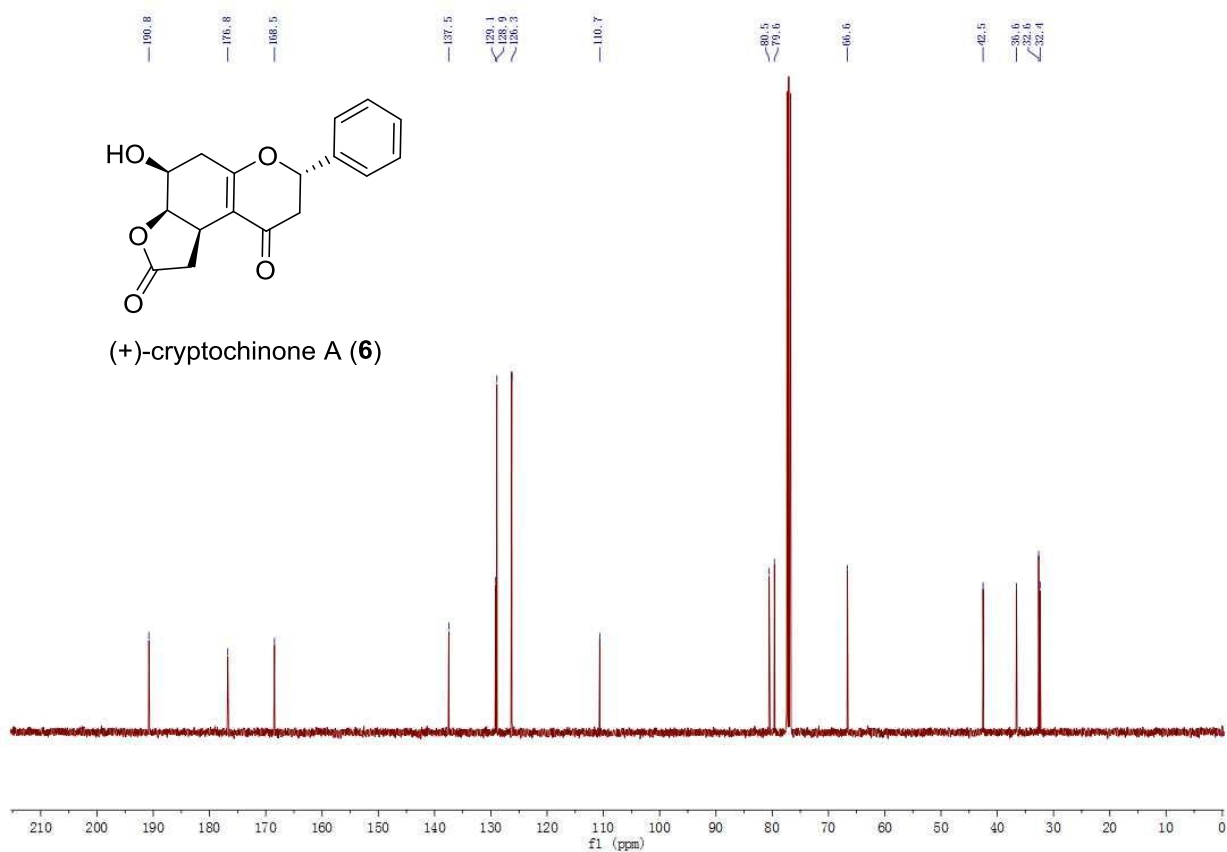

**<sup>1</sup>H NMR spectrum of compound 4 (400 MHz, CDCl<sub>3</sub>)**

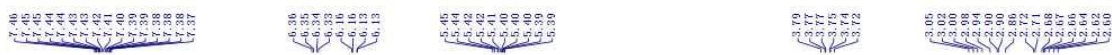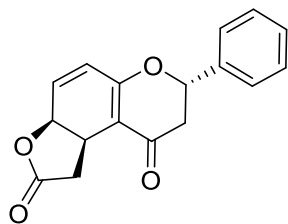

(+)-cryptocaryanone B (**4**)

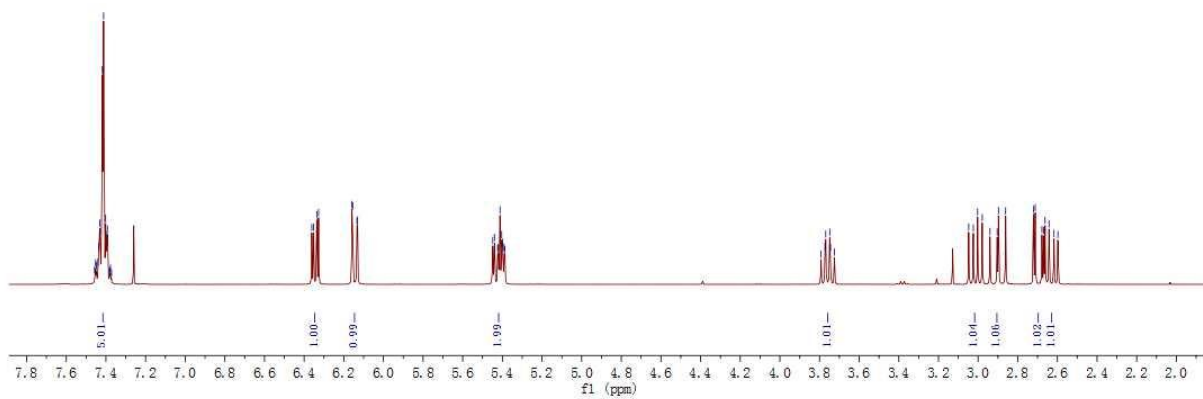

**$^{13}\text{C}$  NMR spectrum of compound 4 (100 MHz,  $\text{CDCl}_3$ )**

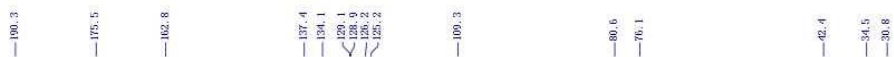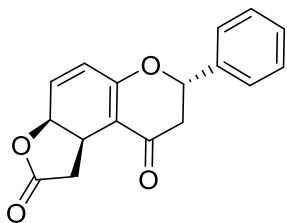

(+)-cryptocaryanone B (**4**)

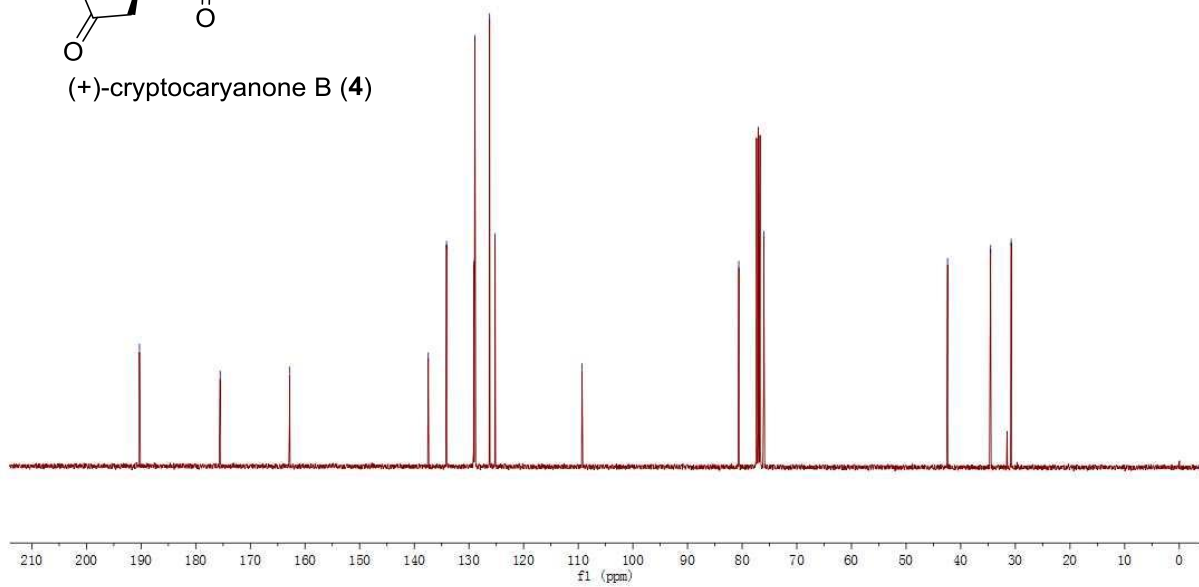

**$^1\text{H}$  NMR spectrum of compound 7 (400 MHz,  $\text{CDCl}_3$ )**

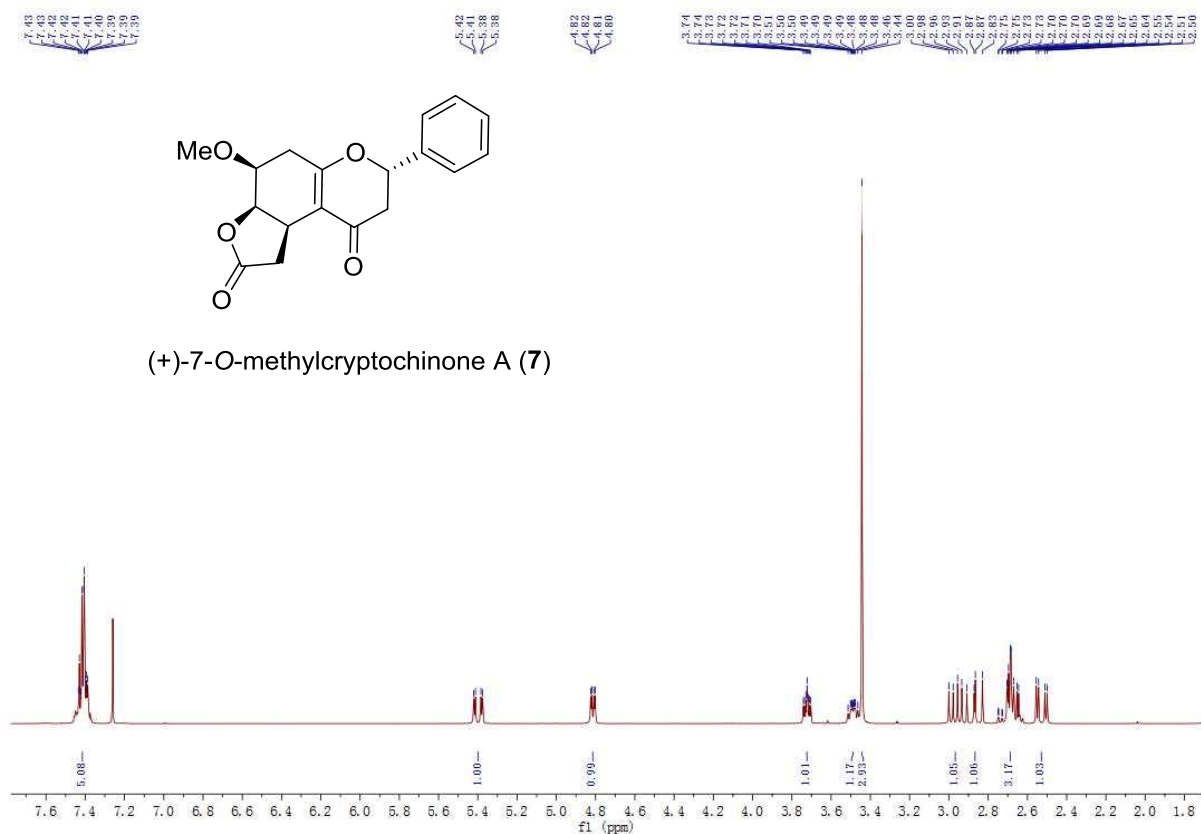

**$^{13}\text{C}$  NMR spectrum of compound 7 (100 MHz,  $\text{CDCl}_3$ )**

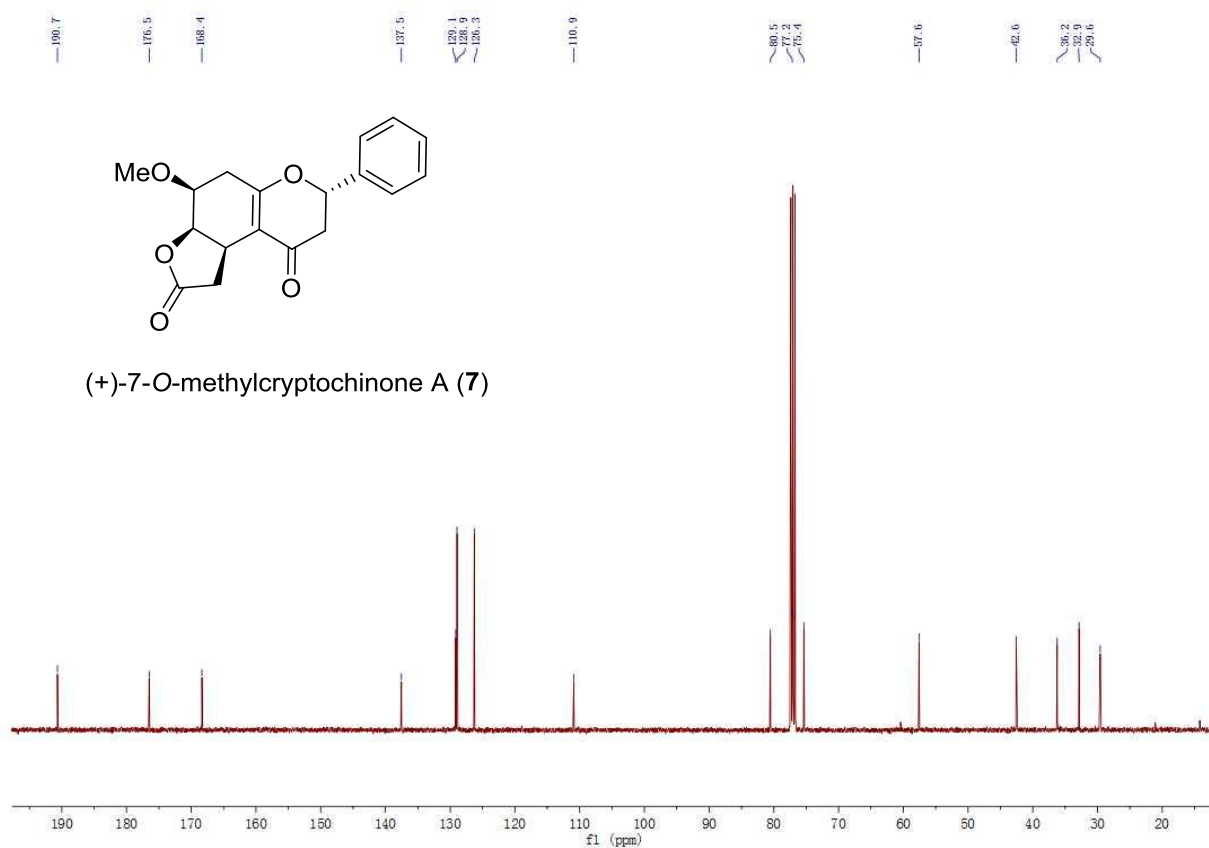

Supplement: Supplementary file 1 [file 10782245]
